# Supplementary material for: The effect of hybridization on transposable element accumulation in an undomesticated fungal species
Source: eLife journal article supplement (doi:10.7554/elife.60474), 2020-09-21

**a**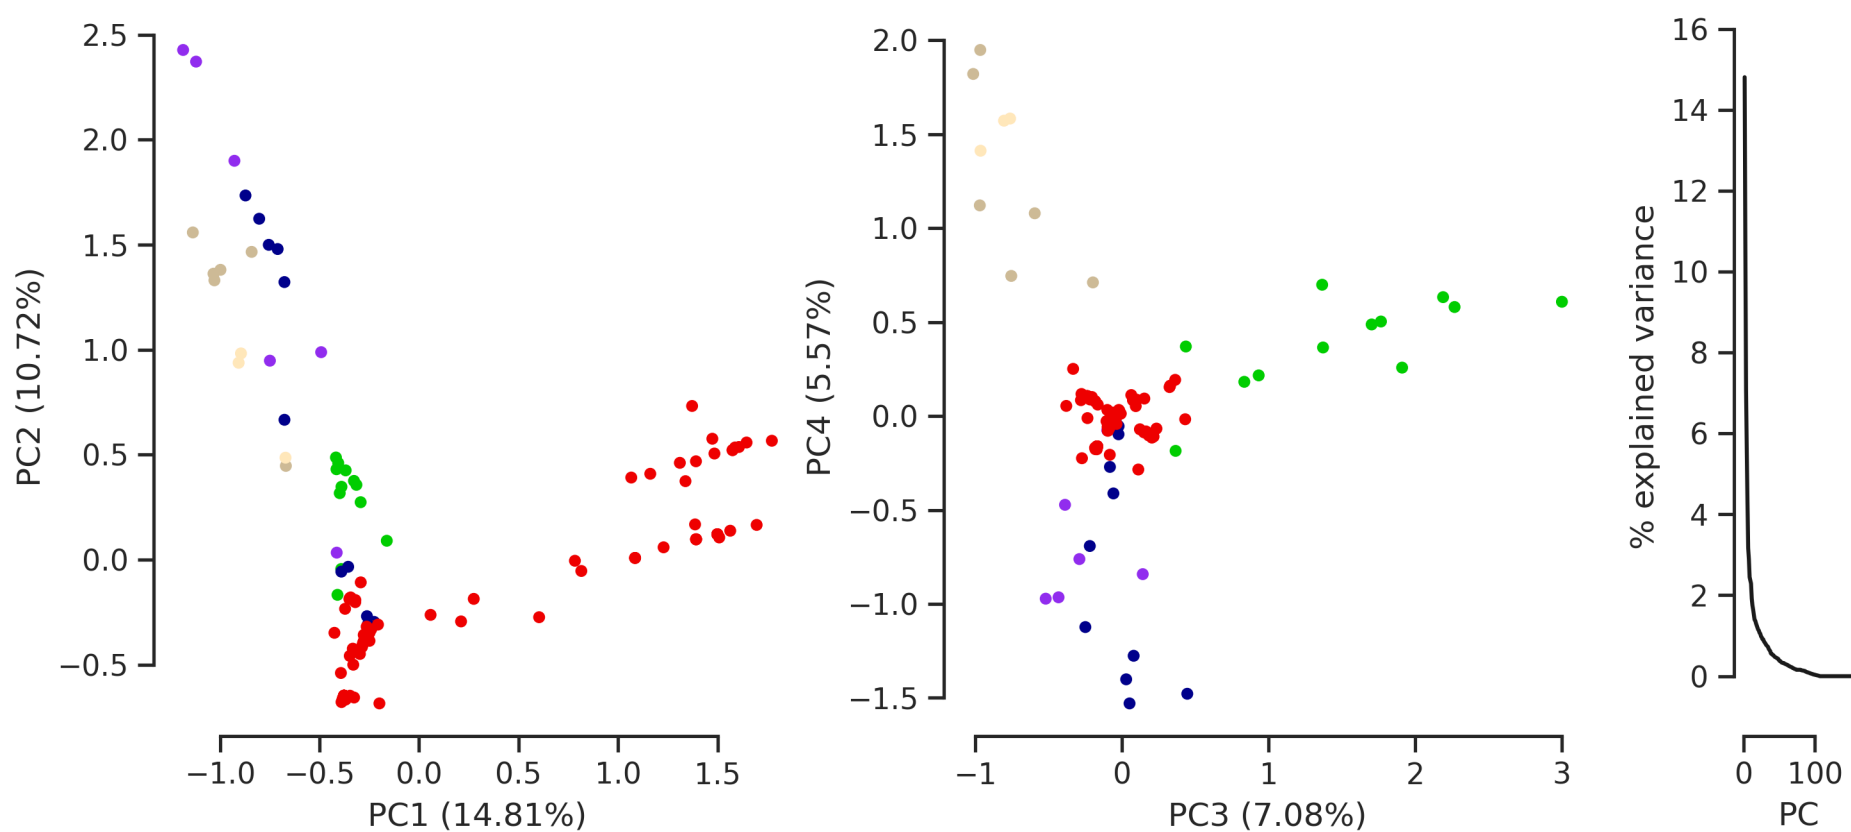**b**

Ty1

*SpA* (12)    *SpC\** (11)  
*SpB* (53)    *SpD<sub>1</sub>* (6)  
*SpC* (25)    *SpD<sub>2</sub>* (12)

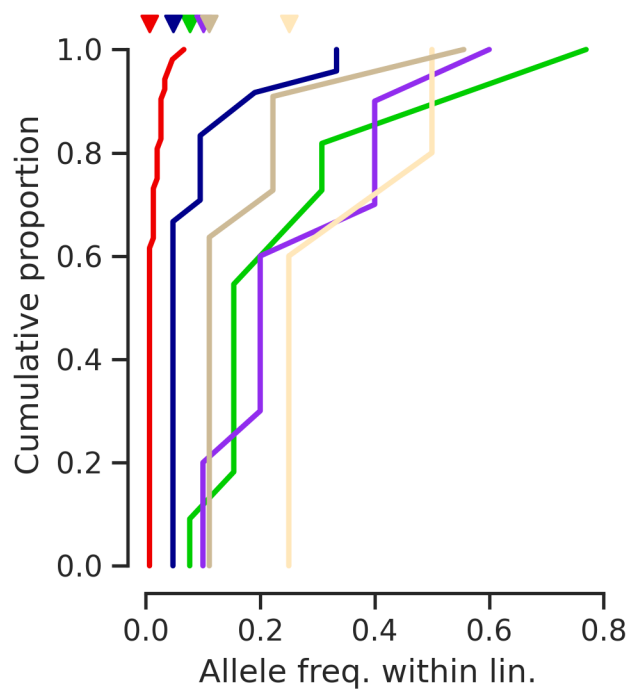

Ty3p

*SpA* (11)    *SpC\** (5)  
*SpB* (20)    *SpD<sub>1</sub>* (6)  
*SpC* (13)    *SpD<sub>2</sub>* (11)

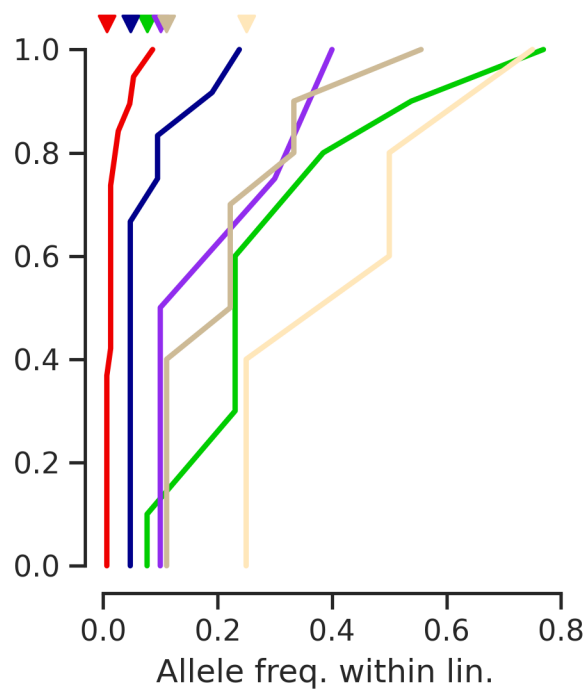

Tsu4/Ty4

*SpB* (35)    *SpD<sub>1</sub>* (5)  
*SpC* (2)    *SpD<sub>2</sub>* (10)  
*SpC\** (4)

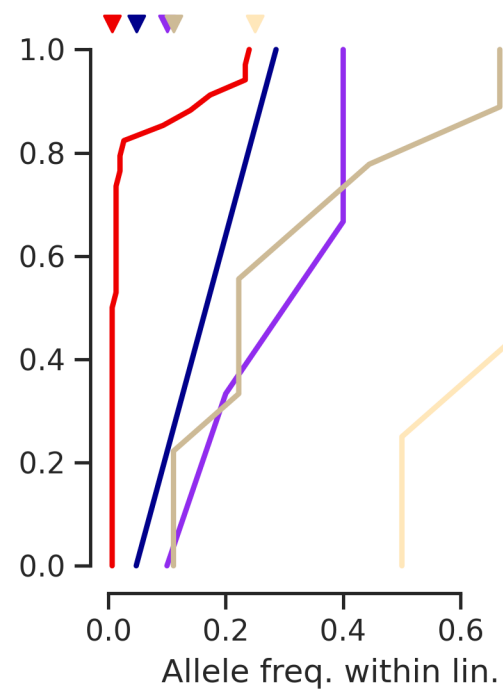

Supplement: supp [file elife-60474-supp-v1.zip]
