# Supplementary material for: The effect of hybridization on transposable element accumulation in an undomesticated fungal species
Source: eLife. 2020 Sep 21;9:e60474. doi: 10.7554/eLife.60474 (PMC7584455; doi:10.7554/eLife.60474)
Supplement: Supplementary file 1. — (a) Description of the wild strains used in this study. CNs of full-length Ty1, Ty3p and Tsu4 (expressed as log2 NRD) are indicated for individual strains. (b) AIC values for linear models testing the association between population structure and environmental variation. (c) Nucleotide diversity at four-fold degenerate sites in protein-coding genes (πS). (d) Primers used for ADE2 deletion in the parental SpC strains generated in this study. Primers were described in Charron et al., 2019. (e) Parental strains used in the MA experiment made in this study. (f) Description of the MA lines used in this study. CNs of full-length Ty1, Ty3p and Tsu4 (expressed as log2 NRD) are indicated for individual strains. [file elife-60474-supp1.xlsx]

## Sheet: Supplementary_File_1a
Strain	Lineage	Location	N	W	Ty1	Ty3p	Tsu4	Phenotyped	Reference - long read assembly	Reference - short reads
14_045Ci	SpA	Rockywold Deephaven Camps, New Hempshire	43.7769	-71.5401	2.95814	0.276318	-1.78508	False		Eberlein, Henault et al. Nat Comm 2019
14_055Ci	SpA	Saint Tite Caps, Quebec, Canada	47.1372	-70.7743	3.63144	0.196282	-1.52254	False		Eberlein, Henault et al. Nat Comm 2019
16_119A	SpA	University of Toronto Mississauga, Ontario, Canada	43.5521	-79.6611	3.23559	0.165051	-1.55338	True		Eberlein, Henault et al. Nat Comm 2019
16_134A	SpA	University of Toronto Mississauga, Ontario, Canada	43.5521	-79.6611	3.20101	0.235075	-1.2933	True		Eberlein, Henault et al. Nat Comm 2019
16_168A	SpA	Riverwood Park, Mississauga, Ontario, Canada	43.5651	-79.6738	4.0911	0.200136	-1.25506	True		Eberlein, Henault et al. Nat Comm 2019
16_183A	SpA	Riverwood Park, Mississauga, Ontario, Canada	43.5651	-79.6738	3.31965	0.228249	-1.29113	True		Eberlein, Henault et al. Nat Comm 2019
16_190A	SpA	Riverwood Park, Mississauga, Ontario, Canada	43.5651	-79.6738	3.24148	0.236919	-1.25951	True		Eberlein, Henault et al. Nat Comm 2019
16_296A	SpA	Andrew Clark House	42.4536	-76.4734	3.09428	0.225384	-1.33533	True		Eberlein, Henault et al. Nat Comm 2019
B2	SpA	University of Toronto Mississauga, Ontario, Canada	43.5521	-79.6611	3.22322	-0.0853439	-0.984977	False		Xia et al. Mol Ecol 2017
LL2012_001	SpA	Hull, Quebec, Canada	45.4287	-75.7133	3.65206	0.0258445	-0.754374	True	Eberlein, Henault et al. Nat Comm 2019	Leducq, Nielly-Thibault, Charron et al. Nat Micro 2016
LL2012_026	SpA	Sherbrooke, Quebec, Canada	45.4027	-71.919	3.61991	0.00365046	-0.659315	True		Leducq, Nielly-Thibault, Charron et al. Nat Micro 2016
YPS642	SpA	Buck Hill Falls, PE	41.1919	-75.2702	4.00278	-0.0148727	-0.737339	True		Leducq, Nielly-Thibault, Charron et al. Nat Micro 2016
YPS744	SpA	Tuscarora NY	42.6304	-77.8682	3.80204	-0.0559418	-0.678872	True		Leducq, Nielly-Thibault, Charron et al. Nat Micro 2016
14_076B	SpB	Pointe Platon, Quebec, Canada	46.662	-71.8395	2.25439	1.69157	5.06599	True		Eberlein, Henault et al. Nat Comm 2019
14_101B	SpB	Pointe Platon, Quebec, Canada	46.662	-71.8395	0.231758	-1.65954	0.0727688	True		Eberlein, Henault et al. Nat Comm 2019
14_123B	SpB	Pointe Platon, Quebec, Canada	46.662	-71.8395	2.23772	1.1298	5.25387	True		Eberlein, Henault et al. Nat Comm 2019
14_136B	SpB	Pointe Platon, Quebec, Canada	46.662	-71.8395	2.54193	1.74285	4.83708	True		Eberlein, Henault et al. Nat Comm 2019
14_152B	SpB	Pointe Platon, Quebec, Canada	46.662	-71.8395	0.163121	-1.42184	-0.11518	True		Eberlein, Henault et al. Nat Comm 2019
15_004B	SpB	Riviere-Verte, New Brunswick, Canada	47.4414	-68.2654	3.45999	1.18157	4.14357	True		Eberlein, Henault et al. Nat Comm 2019
16_004B	SpB	Lac Pink, Parc de la Gatineau, Quebec, Canada	45.4681	-75.8081	3.70927	2.40865	1.90791	True		Eberlein, Henault et al. Nat Comm 2019
16_007B	SpB	Lac Pink, Parc de la Gatineau, Quebec, Canada	45.4681	-75.8081	2.66882	0.186036	0.186036	True		Eberlein, Henault et al. Nat Comm 2019
16_018B	SpB	Lac Meech (Est), Parc de la Gatineau, Quebec, Canada	45.5313	-75.8845	3.44265	3.26463	1.58291	True		Eberlein, Henault et al. Nat Comm 2019
16_020B	SpB	Lac Meech (Est), Parc de la Gatineau, Quebec, Canada	45.5313	-75.8845	3.46911	3.34089	1.46132	True		Eberlein, Henault et al. Nat Comm 2019
16_022B	SpB	Lac Meech (Est), Parc de la Gatineau, Quebec, Canada	45.5313	-75.8845	3.53574	3.42815	1.48219	True		Eberlein, Henault et al. Nat Comm 2019
16_023B	SpB	Lac Meech (Est), Parc de la Gatineau, Quebec, Canada	45.5313	-75.8845	3.4734	3.2574	1.54825	True		Eberlein, Henault et al. Nat Comm 2019
16_025B	SpB	Lac Meech (Est), Parc de la Gatineau, Quebec, Canada	45.5313	-75.8845	0.0512555	-1.49307	0.111797	True		Eberlein, Henault et al. Nat Comm 2019
16_033B	SpB	Lac Meech (Est), Parc de la Gatineau, Quebec, Canada	45.5313	-75.8845	0.0970329	-1.47065	2.77999	False		Eberlein, Henault et al. Nat Comm 2019
16_036B	SpB	Lac Meech (Est), Parc de la Gatineau, Quebec, Canada	45.5313	-75.8845	-0.00509348	-1.41227	-1.41227	True		Eberlein, Henault et al. Nat Comm 2019
16_037B	SpB	Lac Meech (Est), Parc de la Gatineau, Quebec, Canada	45.5313	-75.8845	4.07569	0.0836219	3.38516	True		Eberlein, Henault et al. Nat Comm 2019
16_043B	SpB	Lac Meech (Est), Parc de la Gatineau, Quebec, Canada	45.5313	-75.8845	0.0994352	-1.4214	-1.4214	True		Eberlein, Henault et al. Nat Comm 2019
16_045B	SpB	Lac Meech (Est), Parc de la Gatineau, Quebec, Canada	45.5313	-75.8845	4.14501	2.16334	2.7628	True		Eberlein, Henault et al. Nat Comm 2019
16_046B	SpB	Lac Meech (Est), Parc de la Gatineau, Quebec, Canada	45.5313	-75.8845	-0.0887552	-1.4778	-1.4778	True		Eberlein, Henault et al. Nat Comm 2019
16_055B	SpB	Sucrerie, Parc de la Gatineau, Quebec, Canada	45.5085	-75.8162	3.74036	2.08178	1.51063	True		Eberlein, Henault et al. Nat Comm 2019
16_058B	SpB	Sucrerie, Parc de la Gatineau, Quebec, Canada	45.5085	-75.8162	3.4412	3.30532	1.49796	True		Eberlein, Henault et al. Nat Comm 2019
16_065B	SpB	Sucrerie, Parc de la Gatineau, Quebec, Canada	45.5085	-75.8162	3.78303	2.14123	1.609	True		Eberlein, Henault et al. Nat Comm 2019
16_066B	SpB	Sucrerie, Parc de la Gatineau, Quebec, Canada	45.5085	-75.8162	2.36554	-1.46735	1.84008	True		Eberlein, Henault et al. Nat Comm 2019
16_073B	SpB	Sucrerie, Parc de la Gatineau, Quebec, Canada	45.5085	-75.8162	-0.0574235	-1.55492	-1.55492	True		Eberlein, Henault et al. Nat Comm 2019
16_088B	SpB	University of Toronto Mississauga, Ontario, Canada	43.5521	-79.6611	-1.53225	0.107165	2.77013	True		Eberlein, Henault et al. Nat Comm 2019
16_097B	SpB	University of Toronto Mississauga, Ontario, Canada	43.5521	-79.6611	-1.49857	-1.49857	-1.49857	True		Eberlein, Henault et al. Nat Comm 2019
16_103B	SpB	University of Toronto Mississauga, Ontario, Canada	43.5521	-79.6611	-1.68634	-1.68634	-1.68634	True		Eberlein, Henault et al. Nat Comm 2019
16_189B	SpB	Riverwood Park, Mississauga, Ontario, Canada	43.5651	-79.6738	-1.91107	-1.91107	-1.91107	True		Eberlein, Henault et al. Nat Comm 2019
16_214B	SpB	Afton, Michigan, USA	45.3755	-84.4967	2.64068	1.05572	1.43681	True		Eberlein, Henault et al. Nat Comm 2019
16_217B	SpB	Afton, Michigan, USA	45.3755	-84.4967	2.25656	1.0092	2.10731	True		Eberlein, Henault et al. Nat Comm 2019
16_227B	SpB	Afton, Michigan, USA	45.3755	-84.4967	4.29492	3.09654	1.01972	True		Eberlein, Henault et al. Nat Comm 2019
16_234B	SpB	Afton, Michigan, USA	45.3755	-84.4967	3.00867	0.996693	2.44735	True		Eberlein, Henault et al. Nat Comm 2019
16_236B	SpB	Afton, Michigan, USA	45.3755	-84.4967	3.16841	1.74969	2.48371	False		Eberlein, Henault et al. Nat Comm 2019
16_245B	SpB	Afton, Michigan, USA	45.3755	-84.4967	2.57681	1.67093	1.33948	True		Eberlein, Henault et al. Nat Comm 2019
16_248B	SpB	Afton, Michigan, USA	45.3755	-84.4967	3.85054	1.64776	4.1357	True		Eberlein, Henault et al. Nat Comm 2019
16_250B	SpB	Afton, Michigan, USA	45.3755	-84.4967	3.9831	1.17329	4.10064	True		Eberlein, Henault et al. Nat Comm 2019
16_251B	SpB	Afton, Michigan, USA	45.3755	-84.4967	3.94631	1.73117	4.0682	True		Eberlein, Henault et al. Nat Comm 2019
16_253B	SpB	Afton, Michigan, USA	45.3755	-84.4967	3.98764	1.25268	4.16845	True		Eberlein, Henault et al. Nat Comm 2019
16_255B	SpB	Afton, Michigan, USA	45.3755	-84.4967	4.02995	1.65766	3.97578	True		Eberlein, Henault et al. Nat Comm 2019
16_258B	SpB	Afton, Michigan, USA	45.3755	-84.4967	3.85538	1.14933	4.14361	True		Eberlein, Henault et al. Nat Comm 2019
16_260B	SpB	Afton, Michigan, USA	45.3755	-84.4967	4.0633	1.40904	3.96859	True		Eberlein, Henault et al. Nat Comm 2019
16_261B	SpB	Afton, Michigan, USA	45.3755	-84.4967	3.86684	1.66192	4.06062	True		Eberlein, Henault et al. Nat Comm 2019
16_269B	SpB	Cornell, New York, USA	42.4536	-76.4734	3.88631	1.86246	2.76834	True		Eberlein, Henault et al. Nat Comm 2019
16_271B	SpB	Cornell, New York, USA	42.4536	-76.4734	3.83019	1.72062	2.8572	True		Eberlein, Henault et al. Nat Comm 2019
16_277B	SpB	Cornell, New York, USA	42.4536	-76.4734	3.37326	1.0746	2.25092	False		Eberlein, Henault et al. Nat Comm 2019
16_291B	SpB	Cornell, New York, USA	42.4536	-76.4734	-1.44156	-1.44156	-0.210237	True		Eberlein, Henault et al. Nat Comm 2019
95-7-1D	SpB	East Lansing, MI	42.737	-84.4812	-0.144919	-0.0369166	1.10185	True		Leducq, Nielly-Thibault, Charron et al. Nat Micro 2016
B1	SpB	University of Toronto Mississauga, Ontario, Canada	43.5521	-79.6611	-0.0721135	0.855241	2.27746	False		Leducq, Nielly-Thibault, Charron et al. Nat Micro 2016
LL2012_002	SpB	Pointe Platon, Quebec, Canada	46.662	-71.8395	1.67824	-0.847017	5.28171	True		Leducq, Nielly-Thibault, Charron et al. Nat Micro 2016
LL2012_014	SpB	St Michel de Bellechasse, Quebec, Canada	46.8734	-70.9103	2.97122	-2.42966	0.124925	True		Leducq, Nielly-Thibault, Charron et al. Nat Micro 2016
LL2012_015	SpB	Pointe Platon, Quebec, Canada	46.662	-71.8395	2.46338	1.39873	3.89485	True		Leducq, Nielly-Thibault, Charron et al. Nat Micro 2016
LL2012_021	SpB	Pointe Platon, Quebec, Canada	46.662	-71.8395	1.67474	1.38422	3.56643	True		Leducq, Nielly-Thibault, Charron et al. Nat Micro 2016
LL2012_022	SpB	Saint Justin, Quebec, Canada	46.2529	-73.0851	4.33016	-0.0992298	3.31941	True		Leducq, Nielly-Thibault, Charron et al. Nat Micro 2016
LL2012_024	SpB	Saint Justin, Quebec, Canada	46.2529	-73.0851	4.20007	0.469608	1.59834	True		Leducq, Nielly-Thibault, Charron et al. Nat Micro 2016
LL2012_025	SpB	Sherbrooke, Quebec, Canada	45.4027	-71.919	2.88157	0.828224	5.65207	True		Leducq, Nielly-Thibault, Charron et al. Nat Micro 2016
LL2012_030	SpB	Vancouver, British Columbia, Canada	49.284	-123.125	4.2231	2.55216	0.673467	True		Leducq, Nielly-Thibault, Charron et al. Nat Micro 2016
LL2013_030	SpB	Biddeford, Maine, USA	43.4584	-70.3865	1.91229		-0.706617	True		Leducq, Nielly-Thibault, Charron et al. Nat Micro 2016
LL2013_043	SpB	Woburn, Massachusetts, USA	42.4785	-71.1551	1.10164		-0.561327	True		Leducq, Nielly-Thibault, Charron et al. Nat Micro 2016
MSH-475	SpB	Mont St Hilaire, Quebec, Canada	45.5379	-73.1573	1.7199	-2.51714	-0.0390908	True		Leducq, Nielly-Thibault, Charron et al. Nat Micro 2016
MSH-578a-4-E	SpB	Mont St Hilaire, Quebec, Canada	45.5379	-73.1573	1.86904	-2.60901	-0.831398	True		Leducq, Nielly-Thibault, Charron et al. Nat Micro 2016
MSH-604	SpB	Mont St Hilaire, Quebec, Canada	45.5379	-73.1573	1.12498	0.900489	2.12183	True	Eberlein, Henault et al. Nat Comm 2019	Leducq, Nielly-Thibault, Charron et al. Nat Micro 2016
MSH-605	SpB	Mont St Hilaire, Quebec, Canada	45.5379	-73.1573				True		Leducq, Nielly-Thibault, Charron et al. Nat Micro 2016
R1	SpB	University of Toronto Mississauga, Ontario, Canada	43.5521	-79.6611	-0.993751		-0.993751	False		Xia et al. Mol Ecol 2017
R10	SpB	University of Toronto Mississauga, Ontario, Canada	43.5521	-79.6611	-0.976827		-0.976827	False		Xia et al. Mol Ecol 2017
R11	SpB	University of Toronto Mississauga, Ontario, Canada	43.5521	-79.6611	-1.02126		-1.02126	False		Xia et al. Mol Ecol 2017
R12	SpB	University of Toronto Mississauga, Ontario, Canada	43.5521	-79.6611	-1.11322		-1.11322	False		Xia et al. Mol Ecol 2017
R13	SpB	University of Toronto Mississauga, Ontario, Canada	43.5521	-79.6611	-0.375274		-1.10226	True		Xia et al. Mol Ecol 2017
R14	SpB	University of Toronto Mississauga, Ontario, Canada	43.5521	-79.6611	-1.02591		-1.02591	False		Xia et al. Mol Ecol 2017
R15	SpB	University of Toronto Mississauga, Ontario, Canada	43.5521	-79.6611	-0.567475		-1.07195	False		Xia et al. Mol Ecol 2017
R16	SpB	University of Toronto Mississauga, Ontario, Canada	43.5521	-79.6611	-1.07345		-1.07345	False		Xia et al. Mol Ecol 2017
R17	SpB	University of Toronto Mississauga, Ontario, Canada	43.5521	-79.6611	-1.0046		-1.0046	False		Xia et al. Mol Ecol 2017
R18	SpB	University of Toronto Mississauga, Ontario, Canada	43.5521	-79.6611	-1.18791		-1.18791	False		Xia et al. Mol Ecol 2017
R2	SpB	University of Toronto Mississauga, Ontario, Canada	43.5521	-79.6611	-1.10331		-1.10331	False		Xia et al. Mol Ecol 2017
R28	SpB	University of Toronto Mississauga, Ontario, Canada	43.5521	-79.6611	-0.957222		-0.957222	True		Xia et al. Mol Ecol 2017
R29	SpB	University of Toronto Mississauga, Ontario, Canada	43.5521	-79.6611	-1.07689	1.33722	2.45891	False		Xia et al. Mol Ecol 2017
R3	SpB	University of Toronto Mississauga, Ontario, Canada	43.5521	-79.6611	-1.08256		-1.08256	False		Xia et al. Mol Ecol 2017
R31	SpB	University of Toronto Mississauga, Ontario, Canada	43.5521	-79.6611	-1.00732	-0.19635	3.54673	False		Xia et al. Mol Ecol 2017
R32	SpB	University of Toronto Mississauga, Ontario, Canada	43.5521	-79.6611	-0.999218	-0.0749451	3.56372	False		Xia et al. Mol Ecol 2017
R33	SpB	University of Toronto Mississauga, Ontario, Canada	43.5521	-79.6611	-0.981782	-0.178819	3.54511	True		Xia et al. Mol Ecol 2017
R34	SpB	University of Toronto Mississauga, Ontario, Canada	43.5521	-79.6611	-0.999464	-0.153173	3.59633	False		Xia et al. Mol Ecol 2017
R35	SpB	University of Toronto Mississauga, Ontario, Canada	43.5521	-79.6611	-0.966442	-0.966442	-0.966442	False		Xia et al. Mol Ecol 2017
R36	SpB	University of Toronto Mississauga, Ontario, Canada	43.5521	-79.6611	-0.96977	-0.204986	3.75502	False		Xia et al. Mol Ecol 2017
R37	SpB	University of Toronto Mississauga, Ontario, Canada	43.5521	-79.6611	-1.0207	-0.213346	3.73472	False		Xia et al. Mol Ecol 2017
R38	SpB	University of Toronto Mississauga, Ontario, Canada	43.5521	-79.6611	-1.02483	-0.187105	3.75485	False		Xia et al. Mol Ecol 2017
R39	SpB	University of Toronto Mississauga, Ontario, Canada	43.5521	-79.6611	-0.994348	-0.220352	3.75787	False		Xia et al. Mol Ecol 2017
R4	SpB	University of Toronto Mississauga, Ontario, Canada	43.5521	-79.6611	-0.975253	-0.975253	-0.975253	False		Xia et al. Mol Ecol 2017
R40	SpB	University of Toronto Mississauga, Ontario, Canada	43.5521	-79.6611	-1.03449	-0.229307	3.73662	False		Xia et al. Mol Ecol 2017
R41	SpB	University of Toronto Mississauga, Ontario, Canada	43.5521	-79.6611	-1.04367	-0.274288	3.72931	False		Xia et al. Mol Ecol 2017
R42	SpB	University of Toronto Mississauga, Ontario, Canada	43.5521	-79.6611	-1.08166	-0.230187	3.74018	False		Xia et al. Mol Ecol 2017
R43	SpB	University of Toronto Mississauga, Ontario, Canada	43.5521	-79.6611	-1.03827	-0.213108	3.83263	False		Xia et al. Mol Ecol 2017
R44	SpB	University of Toronto Mississauga, Ontario, Canada	43.5521	-79.6611	-1.00151	-0.267033	3.69366	False		Xia et al. Mol Ecol 2017
R45	SpB	University of Toronto Mississauga, Ontario, Canada	43.5521	-79.6611	-1.05266	-0.18872	3.73185	False		Xia et al. Mol Ecol 2017
R46	SpB	University of Toronto Mississauga, Ontario, Canada	43.5521	-79.6611	-0.986441	-0.237979	3.83272	False		Xia et al. Mol Ecol 2017
R47	SpB	University of Toronto Mississauga, Ontario, Canada	43.5521	-79.6611	-0.956625	-0.18663	3.75139	False		Xia et al. Mol Ecol 2017
R5	SpB	University of Toronto Mississauga, Ontario, Canada	43.5521	-79.6611	-0.999419		-0.999419	False		Xia et al. Mol Ecol 2017
R6	SpB	University of Toronto Mississauga, Ontario, Canada	43.5521	-79.6611	-1.04035	-1.04035	-1.04035	False		Xia et al. Mol Ecol 2017
R7	SpB	University of Toronto Mississauga, Ontario, Canada	43.5521	-79.6611	-0.489872		-1.00197	False		Xia et al. Mol Ecol 2017
R8	SpB	University of Toronto Mississauga, Ontario, Canada	43.5521	-79.6611	-0.355253		-1.01084	False		Xia et al. Mol Ecol 2017
R9	SpB	University of Toronto Mississauga, Ontario, Canada	43.5521	-79.6611	-0.990277		-0.990277	False		Xia et al. Mol Ecol 2017
UTM6	SpB	Toronto, Ontario, Canada	43.5521	-79.6611	-0.723548	-0.723548	-0.723548	True		Leducq, Nielly-Thibault, Charron et al. Nat Micro 2016
UWOPS-80-13	SpB	London, ON	42.9864	-81.2375	0.860098	1.14615	-2.38783	False		Leducq, Nielly-Thibault, Charron et al. Nat Micro 2016
UWOPS-99-501.1	SpB	Long Point, ON	42.5791	-80.4309	-2.97922		-1.97922	False		Leducq, Nielly-Thibault, Charron et al. Nat Micro 2016
UWOPS_79-140	SpB	St-Joseph Island, ON	46.2333	-84.0472	0.198698	-0.774829	-0.774829	True		Leducq, Nielly-Thibault, Charron et al. Nat Micro 2016
UWOPS_91-202	SpB	Long Point, ON	42.5791	-80.4309	-0.767169	-0.767169	-0.767169	True		Leducq, Nielly-Thibault, Charron et al. Nat Micro 2016
WX1	SpB	University of Toronto Mississauga, Ontario, Canada	43.5521	-79.6611	-2.05185	-2.05185	-2.05185	False		Xia et al. Mol Ecol 2017
WX10	SpB	University of Toronto Mississauga, Ontario, Canada	43.5521	-79.6611	-1.04744		-1.04744	False		Xia et al. Mol Ecol 2017
WX11	SpB	University of Toronto Mississauga, Ontario, Canada	43.5521	-79.6611	-1.04367	-1.04367	-1.04367	False		Xia et al. Mol Ecol 2017
WX12	SpB	University of Toronto Mississauga, Ontario, Canada	43.5521	-79.6611	-1.00962	-1.00962	-1.00962	False		Xia et al. Mol Ecol 2017
WX13	SpB	University of Toronto Mississauga, Ontario, Canada	43.5521	-79.6611	-1.234		-1.234	False		Xia et al. Mol Ecol 2017
WX14	SpB	University of Toronto Mississauga, Ontario, Canada	43.5521	-79.6611	-1.12246		-1.12246	False		Xia et al. Mol Ecol 2017
WX15	SpB	University of Toronto Mississauga, Ontario, Canada	43.5521	-79.6611	-1.12087	-1.12087	-1.12087	True		Xia et al. Mol Ecol 2017
WX16	SpB	University of Toronto Mississauga, Ontario, Canada	43.5521	-79.6611	-1.05865	-1.05865	-1.05865	False		Xia et al. Mol Ecol 2017
WX17	SpB	University of Toronto Mississauga, Ontario, Canada	43.5521	-79.6611	-0.34692	-1.06777	-1.06777	False		Xia et al. Mol Ecol 2017
WX18	SpB	University of Toronto Mississauga, Ontario, Canada	43.5521	-79.6611	-1.06414		-1.06414	False		Xia et al. Mol Ecol 2017
WX2	SpB	University of Toronto Mississauga, Ontario, Canada	43.5521	-79.6611	-2.04782	-2.04782	-2.04782	False		Xia et al. Mol Ecol 2017
WX22	SpB	University of Toronto Mississauga, Ontario, Canada	43.5521	-79.6611	1.97148	-1.10328	1.78092	True		Xia et al. Mol Ecol 2017
WX25	SpB	University of Toronto Mississauga, Ontario, Canada	43.5521	-79.6611	-1.04681		-1.04681	False		Xia et al. Mol Ecol 2017
WX26	SpB	University of Toronto Mississauga, Ontario, Canada	43.5521	-79.6611	-1.01221	-1.01221	0.0955889	True		Xia et al. Mol Ecol 2017
WX27	SpB	University of Toronto Mississauga, Ontario, Canada	43.5521	-79.6611	-1.09294	-0.248221	3.54501	False		Xia et al. Mol Ecol 2017
WX28	SpB	University of Toronto Mississauga, Ontario, Canada	43.5521	-79.6611	-1.07112	-0.173688	3.50201	True		Xia et al. Mol Ecol 2017
WX29	SpB	University of Toronto Mississauga, Ontario, Canada	43.5521	-79.6611	-1.10133	-0.24507	3.52349	False		Xia et al. Mol Ecol 2017
WX3	SpB	University of Toronto Mississauga, Ontario, Canada	43.5521	-79.6611	-2.04229	-2.04229	-2.04229	False		Xia et al. Mol Ecol 2017
WX30	SpB	University of Toronto Mississauga, Ontario, Canada	43.5521	-79.6611	-1.05712	-0.166746	3.66748	False		Xia et al. Mol Ecol 2017
WX31	SpB	University of Toronto Mississauga, Ontario, Canada	43.5521	-79.6611	-1.10526	-0.207135	3.63744	False		Xia et al. Mol Ecol 2017
WX32	SpB	University of Toronto Mississauga, Ontario, Canada	43.5521	-79.6611	-0.451875	-0.210793	3.78689	False		Xia et al. Mol Ecol 2017
WX33	SpB	University of Toronto Mississauga, Ontario, Canada	43.5521	-79.6611	-1.08073	-0.247382	3.7341	False		Xia et al. Mol Ecol 2017
WX34	SpB	University of Toronto Mississauga, Ontario, Canada	43.5521	-79.6611	-1.15765	-0.393718	3.7895	False		Xia et al. Mol Ecol 2017
WX35	SpB	University of Toronto Mississauga, Ontario, Canada	43.5521	-79.6611	-1.14779	-0.376411	3.7441	True		Xia et al. Mol Ecol 2017
WX36	SpB	University of Toronto Mississauga, Ontario, Canada	43.5521	-79.6611	-1.10776	-0.235767	3.73512	False		Xia et al. Mol Ecol 2017
WX37	SpB	University of Toronto Mississauga, Ontario, Canada	43.5521	-79.6611	-1.07384	-0.331335	3.89815	False		Xia et al. Mol Ecol 2017
WX38	SpB	University of Toronto Mississauga, Ontario, Canada	43.5521	-79.6611	-1.13045	-0.437114	3.92136	False		Xia et al. Mol Ecol 2017
WX39	SpB	University of Toronto Mississauga, Ontario, Canada	43.5521	-79.6611	-1.07392	-0.364967	3.7175	False		Xia et al. Mol Ecol 2017
WX4	SpB	University of Toronto Mississauga, Ontario, Canada	43.5521	-79.6611	-2.01259	-2.01259	-2.01259	False		Xia et al. Mol Ecol 2017
WX40	SpB	University of Toronto Mississauga, Ontario, Canada	43.5521	-79.6611	-1.10565	-0.245832	3.74956	False		Xia et al. Mol Ecol 2017
WX41	SpB	University of Toronto Mississauga, Ontario, Canada	43.5521	-79.6611	-1.11728	-0.261017	3.79044	False		Xia et al. Mol Ecol 2017
WX42	SpB	University of Toronto Mississauga, Ontario, Canada	43.5521	-79.6611	-1.02085	-1.02085	-1.02085	False		Xia et al. Mol Ecol 2017
WX43	SpB	University of Toronto Mississauga, Ontario, Canada	43.5521	-79.6611	-1.11176	-0.228573	3.72057	False		Xia et al. Mol Ecol 2017
WX44	SpB	University of Toronto Mississauga, Ontario, Canada	43.5521	-79.6611	-0.214594	-0.144205	3.6935	False		Xia et al. Mol Ecol 2017
WX5	SpB	University of Toronto Mississauga, Ontario, Canada	43.5521	-79.6611	-1.11976	-1.11976	-1.11976	False		Xia et al. Mol Ecol 2017
WX6	SpB	University of Toronto Mississauga, Ontario, Canada	43.5521	-79.6611	-0.303954		-1.0487	False		Xia et al. Mol Ecol 2017
WX7	SpB	University of Toronto Mississauga, Ontario, Canada	43.5521	-79.6611	-1.0659	-1.0659	-1.0659	False		Xia et al. Mol Ecol 2017
WX8	SpB	University of Toronto Mississauga, Ontario, Canada	43.5521	-79.6611	-1.07454		-1.07454	False		Xia et al. Mol Ecol 2017
WX9	SpB	University of Toronto Mississauga, Ontario, Canada	43.5521	-79.6611	-0.678708	-1.00802	-1.00802	False		Xia et al. Mol Ecol 2017
YPS484	SpB	Grand Bend, ON	43.3128	-81.7546	0.114622	-0.885378	-0.885378	True		Leducq, Nielly-Thibault, Charron et al. Nat Micro 2016
YPS616	SpB	New Brunswick, NJ	40.4842	-74.4568	-0.73912	-0.73912	1.084	True		Leducq, Nielly-Thibault, Charron et al. Nat Micro 2016
yHBJ17	SpB	Iron River, Wisconsin, USA	46.5628	-91.4153	3.94394	2.09227	2.92078	True		Leducq, Nielly-Thibault, Charron et al. Nat Micro 2016
yHBJ24	SpB	Iron River, Wisconsin, USA	46.5628	-91.4153	3.53186	0.540904	2.91478	True		Leducq, Nielly-Thibault, Charron et al. Nat Micro 2016
yHBJ6	SpB	Iron River, Wisconsin, USA	46.5628	-91.4153	2.85671	0.292949	2.19019	True		Leducq, Nielly-Thibault, Charron et al. Nat Micro 2016
yHKS145	SpB	Madison, Wisconsin, USA	43.0703	-89.4134	2.18651	0.220302	0.487782	True		Leducq, Nielly-Thibault, Charron et al. Nat Micro 2016
yHKS223	SpB	Plainfield, New Hamshire, USA	43.5482	-72.2617	3.95893	1.4196	-0.564636	True		Leducq, Nielly-Thibault, Charron et al. Nat Micro 2016
yHKS253	SpB	Plainfield, New Hamshire, USA	43.5482	-72.2617	5.18056	3.0889	5.26116	True		Leducq, Nielly-Thibault, Charron et al. Nat Micro 2016
14_057Ci	SpC	Mont Orford, Quebec, Canada	45.309	-72.2369	4.16557	2.88042	3.66807	False		Eberlein, Henault et al. Nat Comm 2019
14_100C	SpC	Pointe Platon, Quebec, Canada	46.662	-71.8395	4.45307	1.64288	1.51133	True		Eberlein, Henault et al. Nat Comm 2019
14_103Ci	SpC	Parc Nat Jacques Cartier, Quebec, Canada	47.174	-71.3677	4.52855	2.39824	-1.55237	False		Eberlein, Henault et al. Nat Comm 2019
14_164C	SpC	Pointe Platon, Quebec, Canada	46.662	-71.8395	3.92198	1.2063	-1.83412	False		Eberlein, Henault et al. Nat Comm 2019
14_169C	SpC	Pointe Platon, Quebec, Canada	46.662	-71.8395	3.86253	0.165059	-2.30405	False		Eberlein, Henault et al. Nat Comm 2019
14_177C	SpC	Pointe Platon, Quebec, Canada	46.662	-71.8395	3.97764	1.36535	-2.24346	False		Eberlein, Henault et al. Nat Comm 2019
15_005C	SpC	Riviere-Verte, New Brunswick, Canada	47.4414	-68.2654	4.20291	1.43396	-2.09259	False		Eberlein, Henault et al. Nat Comm 2019
16_035C	SpC	Lac Meech (Est), Parc de la Gatineau, Quebec, Canada	45.5313	-75.8845	-1.7381	-1.7381	-1.7381	True		Eberlein, Henault et al. Nat Comm 2019
16_047C	SpC	Sucrerie, Parc de la Gatineau, Quebec, Canada	45.5085	-75.8162	4.69594	2.09146	-1.66624	True		Eberlein, Henault et al. Nat Comm 2019
16_067C	SpC	Sucrerie, Parc de la Gatineau, Quebec, Canada	45.5085	-75.8162	4.3899	2.823	-1.69832	True		Eberlein, Henault et al. Nat Comm 2019
LL2011_001	SpC	Quebec, Quebec, Canada	46.8151	-71.1963	4.34787	2.06116	-2.40554	True		Leducq, Nielly-Thibault, Charron et al. Nat Micro 2016
LL2011_004	SpC	Cap Chat, Quebec, Canada	49.0935	-66.6861	4.80652	1.50263	-0.749284	True		Leducq, Nielly-Thibault, Charron et al. Nat Micro 2016
LL2011_009	SpC	Squatec, Quebec, Canada	47.8754	-68.747	4.59732	1.57975	-2.09268	True		Leducq, Nielly-Thibault, Charron et al. Nat Micro 2016
LL2011_011	SpC	Squatec, Quebec, Canada	47.8754	-68.747	4.57374	1.44926	-0.889545	True		Leducq, Nielly-Thibault, Charron et al. Nat Micro 2016
LL2011_012	SpC	Station Dushesnay, Quebec, Canada	46.871	-71.6389	4.63952	1.35972	0.261152	True	Eberlein, Henault et al. Nat Comm 2019	Leducq, Nielly-Thibault, Charron et al. Nat Micro 2016
LL2012_006	SpC	Cap Chat, Quebec, Canada	49.0935	-66.6861	4.83047	1.10929	-2.3001	True		Leducq, Nielly-Thibault, Charron et al. Nat Micro 2016
LL2012_027	SpC	Sherbrooke, Quebec, Canada	45.4027	-71.919	4.02583	2.49468	2.43219	True		Leducq, Nielly-Thibault, Charron et al. Nat Micro 2016
LL2013_204	SpC	Orford sur le lac, Quebec, Canada	45.3006	-72.2765	4.06254	3.40576	2.87333	True		Leducq, Nielly-Thibault, Charron et al. Nat Micro 2016
LL2013_207	SpC	Orford sur le lac, Quebec, Canada	45.3006	-72.2765	4.28307	3.43907	3.13798	True		Leducq, Nielly-Thibault, Charron et al. Nat Micro 2016
MSH-587-1	SpC	Mont St Hilaire, Quebec, Canada	45.5379	-73.1573	4.33736	0.904761	2.0396	True		Leducq, Nielly-Thibault, Charron et al. Nat Micro 2016
YPS667	SpC	Buck Hill Falls, PE	41.1919	-75.2702	-0.768623	-0.124767	-0.768623	True		Leducq, Nielly-Thibault, Charron et al. Nat Micro 2016
14_067Ci	SpC*	Pointe Platon, Quebec, Canada	46.662	-71.8395	3.36523	-1.60378	-0.077712	True		Eberlein, Henault et al. Nat Comm 2019
14_092Ci	SpC*	Pointe Platon, Quebec, Canada	46.662	-71.8395	3.37707	-1.59562	-1.59562	True		Eberlein, Henault et al. Nat Comm 2019
14_121Ci	SpC*	Pointe Platon, Quebec, Canada	46.662	-71.8395	3.64936	-2.00528	-0.0604173	True		Eberlein, Henault et al. Nat Comm 2019
14_161Ci	SpC*	Pointe Platon, Quebec, Canada	46.662	-71.8395	2.84869	-1.9842	1.90454	True		Eberlein, Henault et al. Nat Comm 2019
14_178Ci	SpC*	Pointe Platon, Quebec, Canada	46.662	-71.8395	2.96549	-1.65456	0.0559329	True		Eberlein, Henault et al. Nat Comm 2019
16_199C	SpC*	Riverwood Park, Mississauga, Ontario, Canada	43.5651	-79.6738	0.639793	-1.60813	-1.60813	False		Eberlein, Henault et al. Nat Comm 2019
LL2011_005	SpC*	Ile d'Orleans, Quebec, Canada	46.9101	-71.0447	3.35549	-0.733603	2.79237	True		Leducq, Nielly-Thibault, Charron et al. Nat Micro 2016
LL2012_016	SpC*	Pointe Platon, Quebec, Canada	46.662	-71.8395	3.8854	-0.696216	0.204248	True	Eberlein, Henault et al. Nat Comm 2019	Leducq, Nielly-Thibault, Charron et al. Nat Micro 2016
LL2012_018	SpC*	Pointe Platon, Quebec, Canada	46.662	-71.8395	3.7	-0.818016	0.0487172	True		Leducq, Nielly-Thibault, Charron et al. Nat Micro 2016
LL2012_020	SpC*	Pointe Platon, Quebec, Canada	46.662	-71.8395	3.37168		-1.63795	True		Leducq, Nielly-Thibault, Charron et al. Nat Micro 2016
M2	SpD1	University of Toronto Mississauga, Ontario, Canada	43.5521	-79.6611	2.90841	-0.976556	2.09278	True		Xia et al. Mol Ecol 2017
R22	SpD1	University of Toronto Mississauga, Ontario, Canada	43.5521	-79.6611	3.01269		2.18714	True		Xia et al. Mol Ecol 2017
R23	SpD1	University of Toronto Mississauga, Ontario, Canada	43.5521	-79.6611	2.99807	-1.02736	2.12868	False	Eberlein, Henault et al. Nat Comm 2019	Xia et al. Mol Ecol 2017
R24	SpD1	University of Toronto Mississauga, Ontario, Canada	43.5521	-79.6611	3.01115	-0.977424	2.14476	True		Xia et al. Mol Ecol 2017
B3	SpD2	University of Toronto Mississauga, Ontario, Canada	43.5521	-79.6611	2.92636	-1.01411	2.04668	True		Xia et al. Mol Ecol 2017
M1	SpD2	University of Toronto Mississauga, Ontario, Canada	43.5521	-79.6611	3.12814	-1.01368	2.09104	True		Xia et al. Mol Ecol 2017
M3	SpD2	University of Toronto Mississauga, Ontario, Canada	43.5521	-79.6611	2.90226	-1.06094	2.38337	True		Xia et al. Mol Ecol 2017
R19	SpD2	University of Toronto Mississauga, Ontario, Canada	43.5521	-79.6611	3.09664		2.15582	True		Xia et al. Mol Ecol 2017
R20	SpD2	University of Toronto Mississauga, Ontario, Canada	43.5521	-79.6611	2.48509		2.14827	True		Xia et al. Mol Ecol 2017
R21	SpD2	University of Toronto Mississauga, Ontario, Canada	43.5521	-79.6611	2.7585		2.19279	True		Xia et al. Mol Ecol 2017
WX19	SpD2	University of Toronto Mississauga, Ontario, Canada	43.5521	-79.6611	2.96725	-1.13556	2.00492	True		Xia et al. Mol Ecol 2017
WX20	SpD2	University of Toronto Mississauga, Ontario, Canada	43.5521	-79.6611	3.01943	-1.06804	1.99755	True	Eberlein, Henault et al. Nat Comm 2019	Xia et al. Mol Ecol 2017
WX21	SpD2	University of Toronto Mississauga, Ontario, Canada	43.5521	-79.6611	2.93995	-1.05791	2.50106	True		Xia et al. Mol Ecol 2017

## Sheet: Supplementary_File_1b
Dataset	Family	AIC
		gPCs+ePCs	gPCs
All lineages	Ty1	562.75	569.19
All lineages	Ty3p	462.21	459.91
All lineages	Tsu4	705.99	704.18
SpB	Ty1	109.64	172.09
SpB	Ty3p	103.16	162.77
SpB	Tsu4	294.08	306.74
SpC	Ty1	-30.77	-2.88
SpC	Ty3p	33.13	33.85
SpC	Tsu4	31.06	66.3

## Sheet: Supplementary_File_1c
Lineage	πS
SpA	3.34e-05
SpB	0.0025064
SpC	0.0007916
SpC*	0.0004162
SpD1	1.2e-06
SpD2	0.0008641

## Sheet: Supplementary_File_1d
Name	Sequence
CLOP97-F5	acaattaaggaatcaagaaaccgtgataaaaaattcaagtCAGCTGAAGCTTCGTACGC
CLOP97-F6	gtaattgttcgctggccaagtatattaatacatttatataGCATAGGCCACTAGTGGATC

## Sheet: Supplementary_File_1e
Background	Ploidy	Genotype	Reference
LL2011_001	Haploid	MATa hoΔ::kanMX4	Charron et al., 2014
LL2011_001	Haploid	MATa hoΔ::kanMX4 ade2Δ::hphNT1	This study
LL2011_012	Haploid	MATa hoΔ::kanMX4	Leducq et al., 2016
LL2011_012	Haploid	MATa hoΔ::kanMX4 ade2Δ::hphNT1	This study
MSH-587-1	Haploid	MATa hoΔ::natMX4	Charron et al., 2014
MSH-587-1	Haploid	MATa hoΔ::natMX4 ade2Δ::hphNT1	This study

## Sheet: Supplementary_File_1f
Strain	Cross	Timepoint	Evolutionary divergence between parents	Ty1	Ty3p	Tsu4	Library name	Reference
J4	CC1	Tini	0.00751943	4.78257	1.63892	1.41721	NS.1249.001.N704---N504.J4_P1	This study
J4	CC1	Tend	0.00751943	4.72249	1.371	1.17285	NS.1250.001.N704---N508.J4_P35	This study
J5	CC1	Tini	0.00751943	4.7504	1.52591	1.20398	NS.1249.002.N711---N517.J5_P1	This study
J5	CC1	Tend	0.00751943	4.79039	1.38035	1.312	NS.1250.001.N712---N508.J5_P35	This study
J6	CC1	Tini	0.00751943	4.89352	1.71331	1.24345	NS.1249.001.N701---N504.J6_P1	This study
J6	CC1	Tend	0.00751943	4.70077	0.946997	1.40368	NS.1250.002.N711---N505.J6_P35	This study
J7	CC1	Tini	0.00751943	4.79688	1.58121	1.42826	NS.1249.001.N708---N505.J7_P1	This study
J7	CC1	Tend	0.00751943	4.70056	1.87488	0.419478	NS.1250.002.N703---N507.J7_P35	This study
J10	CC1	Tini	0.00751943	4.89188	1.62111	1.42713	NS.1249.001.N707---N503.J10_P1	This study
J10	CC1	Tend	0.00751943	4.57207	1.63072	1.03581	NS.1250.002.N710---N507.J10_P35	This study
J11	CC1	Tini	0.00751943	4.74196	1.4574	1.55913	NS.1249.001.N710---N507.J11_P1	This study
J11	CC1	Tend	0.00751943	4.81059	1.57537	1.54736	NS.1250.001.N706---N517.J11_P35	This study
J15	CC1	Tini	0.00751943	4.88625	1.62476	1.35218	NS.1249.001.N707---N505.J15_P1	This study
J15	CC1	Tend	0.00751943	4.65408	1.66893	0.830676	NS.1250.002.N703---N503.J15_P35	This study
J16	CC1	Tini	0.00751943	4.89848	1.68852	1.31633	NS.1249.001.N701---N502.J16_P1	This study
J16	CC1	Tend	0.00751943	4.39772	1.77409	0.627019	NS.1250.001.N704---N506.J16_P35	This study
J18	CC1	Tini	0.00751943	4.79694	1.5326	1.19886	NS.1249.002.N705---N508.J18_P1	This study
J18	CC1	Tend	0.00751943	4.67273	0.976763	1.37906	NS.1250.001.N711---N504.J18_P35	This study
J19	CC1	Tini	0.00751943	4.56663	1.49043	1.36037	NS.1249.002.N704---N502.J19_P1	This study
J19	CC1	Tend	0.00751943	4.80895	1.41431	0.773966	NS.1250.002.N707---N508.J19_P35	This study
J20	CC1	Tini	0.00751943	4.79047	1.59433	1.45215	NS.1249.001.N706---N502.J20_P1	This study
J20	CC1	Tend	0.00751943	4.64304	1.33701	1.23841	NS.1250.001.N712---N503.J20_P35	This study
J21	CC1	Tini	0.00751943	4.654	1.48772	1.35741	NS.1249.002.N704---N507.J21_P1	This study
J21	CC1	Tend	0.00751943	4.77772	1.3677	1.18128	NS.1250.001.N703---N505.J21_P35	This study
J22	CC1	Tini	0.00751943	4.69296	1.45083	1.37304	NS.1249.002.N702---N502.J22_P1	This study
J22	CC1	Tend	0.00751943	4.59671	0.893105	1.64647	NS.1250.001.N710---N504.J22_P35	This study
J23	CC1	Tini	0.00751943	4.67891	1.57111	1.27994	NS.1249.002.N704---N517.J23_P1	This study
J23	CC1	Tend	0.00751943	4.60211	1.76204	0.234173	NS.1250.001.N701---N505.J23_P35	This study
J25	CC1	Tini	0.00751943	4.79688	1.62418	1.33652	NS.1249.001.N710---N504.J25_P1	This study
J25	CC1	Tend	0.00751943	4.71477	1.2929	1.35722	NS.1250.002.N701---N505.J25_P35	This study
J26	CC1	Tini	0.00751943	4.87223	1.6648	1.40673	NS.1249.001.N707---N507.J26_P1	This study
J26	CC1	Tend	0.00751943	4.60913	1.27576	1.46104	NS.1250.002.N707---N505.J26_P35	This study
J29	CC1	Tini	0.00751943	4.83577	1.895	0.987536	NS.1249.002.N701---N506.J29_P1	This study
J29	CC1	Tend	0.00751943	4.6469	1.7395	0.626603	NS.1250.001.N703---N503.J29_P35	This study
J30	CC1	Tini	0.00751943	4.76059	1.67963	0.84062	NS.1249.002.N710---N508.J30_P1	This study
J30	CC1	Tend	0.00751943	4.78381	1.58988	1.09181	NS.1250.002.N707---N507.J30_P35	This study
J31	CC1	Tini	0.00751943	4.66288	1.48274	1.40474	NS.1249.002.N706---N517.J31_P1	This study
J31	CC1	Tend	0.00751943	4.60003	1.29787	1.02301	NS.1250.001.N703---N507.J31_P35	This study
J33	CC1	Tini	0.00751943	4.93313	1.92335	0.84835	NS.1249.002.N701---N508.J33_P1	This study
J33	CC1	Tend	0.00751943	4.76051	1.59467	1.09871	NS.1250.002.N708---N504.J33_P35	This study
J34	CC1	Tini	0.00751943	4.56774	1.41949	1.16447	NS.1249.002.N708---N506.J34_P1	This study
J34	CC1	Tend	0.00751943	4.48281	1.84206	1.1154	NS.1250.001.N705---N506.J34_P35	This study
J35	CC1	Tini	0.00751943	4.93343	1.77053	1.04405	NS.1249.001.N704---N508.J35_P1	This study
J35	CC1	Tend	0.00751943	4.74094	1.6336	1.05543	NS.1250.001.N709---N503.J35_P35	This study
J36	CC1	Tini	0.00751943	4.7448	1.76359	1.24702	NS.1249.002.N710---N502.J36_P1	This study
J36	CC1	Tend	0.00751943	4.59615	2.14316	0.681649	NS.1250.001.N709---N507.J36_P35	This study
J37	CC1	Tini	0.00751943	4.84151	1.63132	1.39198	NS.1249.001.N709---N508.J37_P1	This study
J37	CC1	Tend	0.00751943	4.42409	1.55363	0.74903	NS.1250.002.N703---N505.J37_P35	This study
J38	CC1	Tini	0.00751943	4.48882	1.52354	1.18585	NS.1249.002.N706---N508.J38_P1	This study
J38	CC1	Tend	0.00751943	4.5034	1.56216	0.655274	NS.1250.002.N704---N517.J38_P35	This study
J39	CC1	Tini	0.00751943	4.81977	1.55839	1.4718	NS.1249.001.N703---N517.J39_P1	This study
J39	CC1	Tend	0.00751943	4.78076	1.08254	1.36468	NS.1250.002.N701---N517.J39_P35	This study
J43	CC1	Tini	0.00751943	4.80833	1.54499	1.14622	NS.1249.002.N711---N508.J43_P1	This study
J43	CC1	Tend	0.00751943	4.78645	1.80471	0.978543	NS.1250.002.N702---N517.J43_P35	This study
J44	CC1	Tini	0.00751943	4.80374	1.89259	0.735047	NS.1249.001.N709---N517.J44_P1	This study
J44	CC1	Tend	0.00751943	4.64855	2.12387	0.620979	NS.1250.002.N706---N502.J44_P35	This study
J45	CC1	Tini	0.00751943	4.81703	1.64314	1.46539	NS.1249.001.N706---N503.J45_P1	This study
J45	CC1	Tend	0.00751943	4.85031	2.11153	0.475864	NS.1250.001.N701---N508.J45_P35	This study
J46	CC1	Tini	0.00751943	4.78276	1.58051	1.43791	NS.1249.001.N712---N502.J46_P1	This study
J46	CC1	Tend	0.00751943	4.63069	1.32493	0.743878	NS.1250.001.N711---N507.J46_P35	This study
J47	CC1	Tini	0.00751943	4.92067	1.65328	1.43243	NS.1249.001.N701---N503.J47_P1	This study
J47	CC1	Tend	0.00751943	4.70285	1.84955	0.597632	NS.1250.002.N704---N503.J47_P35	This study
J51	CC1	Tini	0.00751943	4.62229	1.48956	1.30743	NS.1249.002.N706---N503.J51_P1	This study
J51	CC1	Tend	0.00751943	4.69294	1.78625	0.685018	NS.1250.002.N703---N506.J51_P35	This study
J54	CC1	Tini	0.00751943	4.835	1.37702	1.16607	NS.1249.002.N703---N508.J54_P1	This study
J54	CC1	Tend	0.00751943	4.8627	1.60072	1.53779	NS.1250.001.N712---N504.J54_P35	This study
J55	CC1	Tini	0.00751943	4.62253	1.56583	1.29936	NS.1249.001.N704---N503.J55_P1	This study
J55	CC1	Tend	0.00751943	4.62602	1.87628	0.993378	NS.1250.002.N701---N504.J55_P35	This study
J56	CC1	Tini	0.00751943	4.75549	1.29974	1.42671	NS.1249.001.N712---N505.J56_P1	This study
J56	CC1	Tend	0.00751943	4.69106	1.58628	1.00609	NS.1250.001.N704---N517.J56_P35	This study
J59	CC1	Tini	0.00751943	4.67202	1.55885	1.29153	NS.1249.001.N711---N507.J59_P1	This study
J59	CC1	Tend	0.00751943	4.72415	1.82971	0.817258	NS.1250.001.N710---N505.J59_P35	This study
J60	CC1	Tini	0.00751943	4.73514	1.5931	1.44356	NS.1249.001.N711---N502.J60_P1	This study
J60	CC1	Tend	0.00751943	4.59539	0.986225	1.3976	NS.1250.002.N702---N502.J60_P35	This study
J63	CC1	Tini	0.00751943	4.67976	1.54342	1.34711	NS.1249.002.N705---N503.J63_P1	This study
J63	CC1	Tend	0.00751943	4.85399	1.22358	1.32389	NS.1250.001.N712---N517.J63_P35	This study
J64	CC1	Tini	0.00751943	4.78718	1.31152	1.66891	NS.1249.001.N712---N517.J64_P1	This study
J64	CC1	Tend	0.00751943	4.66613	1.39661	1.39661	NS.1250.002.N712---N502.J64_P35	This study
K2	CC2	Tini	0.00747778	4.89218	1.47699	-0.72758	NS.1249.001.N711---N506.K2_P1	This study
K2	CC2	Tend	0.00747778	4.68936	1.48279	-0.852975	NS.1250.001.N705---N503.K2_P35	This study
K3	CC2	Tini	0.00747778	4.65205	1.79379	-0.839036	NS.1249.002.N703---N502.K3_P1	This study
K3	CC2	Tend	0.00747778	4.58817	1.91677	-1.04177	NS.1250.002.N712---N503.K3_P35	This study
K5	CC2	Tini	0.00747778	4.74098	1.54799	-0.847934	NS.1249.002.N708---N503.K5_P1	This study
K5	CC2	Tend	0.00747778	4.88521	1.75064	-1.13072	NS.1250.002.N702---N503.K5_P35	This study
K7	CC2	Tini	0.00747778	4.66795	1.77321	-0.795012	NS.1249.002.N703---N505.K7_P1	This study
K7	CC2	Tend	0.00747778	4.90139	1.69888	-0.74213	NS.1250.001.N703---N508.K7_P35	This study
K8	CC2	Tini	0.00747778	4.84713	1.86437	-0.946801	NS.1249.001.N711---N508.K8_P1	This study
K8	CC2	Tend	0.00747778	4.86315	1.87028	-0.915218	NS.1250.002.N701---N508.K8_P35	This study
K9	CC2	Tini	0.00747778	4.90833	1.87259	-0.827851	NS.1249.001.N705---N517.K9_P1	This study
K9	CC2	Tend	0.00747778	4.90105	1.9454	-0.446112	NS.1250.002.N705---N517.K9_P35	This study
K10	CC2	Tini	0.00747778	4.81808	1.88303	-0.874999	NS.1249.001.N704---N506.K10_P1	This study
K10	CC2	Tend	0.00747778	4.82283	1.61618	-0.861866	NS.1250.001.N706---N503.K10_P35	This study
K11	CC2	Tini	0.00747778	4.76842	1.82712	-0.762646	NS.1249.001.N708---N502.K11_P1	This study
K11	CC2	Tend	0.00747778	4.76812	2.03115	-1.00551	NS.1250.001.N703---N517.K11_P35	This study
K13	CC2	Tini	0.00747778	4.62577	1.80873	-0.919194	NS.1249.002.N705---N505.K13_P1	This study
K13	CC2	Tend	0.00747778	4.63472	1.93592	-0.779847	NS.1250.001.N703---N506.K13_P35	This study
K15	CC2	Tini	0.00747778	4.89347	1.90079	-0.72565	NS.1249.001.N709---N506.K15_P1	This study
K15	CC2	Tend	0.00747778	4.79537	1.94398	-0.810903	NS.1250.002.N709---N504.K15_P35	This study
K17	CC2	Tini	0.00747778	4.99092	1.86152	-0.611967	NS.1249.001.N701---N505.K17_P1	This study
K17	CC2	Tend	0.00747778	4.88115	1.66164	-0.84086	NS.1250.001.N709---N517.K17_P35	This study
K18	CC2	Tini	0.00747778	4.84476	1.83873	-0.87854	NS.1249.002.N701---N502.K18_P1	This study
K18	CC2	Tend	0.00747778	4.95517	1.71659	-0.981968	NS.1250.001.N712---N502.K18_P35	This study
K19	CC2	Tini	0.00747778	4.64748	1.96268	-0.872353	NS.1249.002.N702---N508.K19_P1	This study
K19	CC2	Tend	0.00747778	4.87176	1.98482	-0.879639	NS.1250.001.N710---N502.K19_P35	This study
K20	CC2	Tini	0.00747778	5.00536	1.98342	-1.04478	NS.1249.001.N707---N508.K20_P1	This study
K20	CC2	Tend	0.00747778	4.75438	1.69115	-0.810101	NS.1250.001.N706---N502.K20_P35	This study
K21	CC2	Tini	0.00747778	4.87433	1.88671	-0.774199	NS.1249.001.N710---N502.K21_P1	This study
K21	CC2	Tend	0.00747778	4.84987	2.36595	-0.840947	NS.1250.001.N701---N506.K21_P35	This study
K24	CC2	Tini	0.00747778	4.79821	1.89846	-0.837494	NS.1249.001.N708---N504.K24_P1	This study
K24	CC2	Tend	0.00747778	4.78316	1.87362	0.145487	NS.1250.001.N708---N507.K24_P35	This study
K25	CC2	Tini	0.00747778	4.81636	1.94595	-0.974269	NS.1249.002.N701---N503.K25_P1	This study
K25	CC2	Tend	0.00747778	4.79613	1.74168	-0.796488	NS.1250.002.N710---N502.K25_P35	This study
K28	CC2	Tini	0.00747778	4.85325	1.63443	-0.801388	NS.1249.001.N711---N505.K28_P1	This study
K28	CC2	Tend	0.00747778	4.72475	1.38094	-0.934702	NS.1250.002.N709---N503.K28_P35	This study
K30	CC2	Tini	0.00747778	4.96901	2.00915	-0.925187	NS.1249.001.N712---N508.K30_P1	This study
K30	CC2	Tend	0.00747778	4.83507	1.86047	-0.819377	NS.1250.002.N705---N502.K30_P35	This study
K31	CC2	Tini	0.00747778	4.81579	1.92939	-1.03409	NS.1249.002.N712---N517.K31_P1	This study
K31	CC2	Tend	0.00747778	4.94958	1.90281	-0.965357	NS.1250.002.N703---N508.K31_P35	This study
K32	CC2	Tini	0.00747778	4.62795	1.81851	-0.82992	NS.1249.002.N705---N506.K32_P1	This study
K32	CC2	Tend	0.00747778	4.70498	1.39439	0.202338	NS.1250.001.N705---N505.K32_P35	This study
K33	CC2	Tini	0.00747778	4.60888	1.79501	-1.01489	NS.1249.002.N706---N505.K33_P1	This study
K33	CC2	Tend	0.00747778	4.67473	1.86344	-1.03886	NS.1250.002.N712---N517.K33_P35	This study
K38	CC2	Tini	0.00747778	4.84217	1.91369	-0.82634	NS.1249.001.N708---N508.K38_P1	This study
K38	CC2	Tend	0.00747778	4.82547	1.21941	-0.646136	NS.1250.001.N704---N505.K38_P35	This study
K40	CC2	Tini	0.00747778	4.63516	1.81403	-0.973073	NS.1249.002.N709---N508.K40_P1	This study
K40	CC2	Tend	0.00747778	4.62282	1.58285	0.303519	NS.1250.001.N704---N504.K40_P35	This study
K43	CC2	Tini	0.00747778	4.69098	1.93051	-0.688401	NS.1249.001.N708---N506.K43_P1	This study
K43	CC2	Tend	0.00747778	4.8112	1.83594	-0.759671	NS.1250.001.N709---N502.K43_P35	This study
K45	CC2	Tini	0.00747778	4.69293	1.73785	0.182751	NS.1249.002.N710---N517.K45_P1	This study
K45	CC2	Tend	0.00747778	4.7548	2.60054	-0.828061	NS.1250.001.N708---N508.K45_P35	This study
K47	CC2	Tini	0.00747778	4.7116	1.78593	-0.95527	NS.1249.002.N708---N517.K47_P1	This study
K47	CC2	Tend	0.00747778	4.90998	2.39678	-1.12482	NS.1250.002.N711---N508.K47_P35	This study
K48	CC2	Tini	0.00747778	4.85621	1.74822	-0.670868	NS.1249.001.N705---N505.K48_P1	This study
K48	CC2	Tend	0.00747778	4.7236	1.77896	0.21909	NS.1250.002.N702---N506.K48_P35	This study
K50	CC2	Tini	0.00747778	4.7312	1.81207	-0.896632	NS.1249.001.N706---N504.K50_P1	This study
K50	CC2	Tend	0.00747778	4.70305	2.04024	-0.9413	NS.1250.001.N711---N502.K50_P35	This study
K51	CC2	Tini	0.00747778	4.97446	1.65567	-0.842358	NS.1249.001.N702---N502.K51_P1	This study
K51	CC2	Tend	0.00747778	4.29793	1.39104	0.976004	NS.1250.001.N711---N505.K51_P35	This study
K52	CC2	Tini	0.00747778	4.78092	1.86275	-0.783946	NS.1249.001.N703---N506.K52_P1	This study
K52	CC2	Tend	0.00747778	4.89327	1.61111	-0.926683	NS.1250.002.N703---N517.K52_P35	This study
K53	CC2	Tini	0.00747778	4.62983	1.7841	-0.913496	NS.1249.002.N711---N507.K53_P1	This study
K53	CC2	Tend	0.00747778	4.81642	1.76839	-0.902305	NS.1250.002.N707---N517.K53_P35	This study
K54	CC2	Tini	0.00747778	4.7662	1.72796	-0.699048	NS.1249.002.N709---N507.K54_P1	This study
K54	CC2	Tend	0.00747778	4.78273	1.72571	-0.896547	NS.1250.002.N712---N504.K54_P35	This study
K56	CC2	Tini	0.00747778	4.95887	1.72226	-0.663028	NS.1249.001.N711---N517.K56_P1	This study
K56	CC2	Tend	0.00747778	4.65608	1.6171	-0.00399222	NS.1250.001.N705---N517.K56_P35	This study
K57	CC2	Tini	0.00747778	4.66191	1.7482	-0.851482	NS.1249.002.N707---N507.K57_P1	This study
K57	CC2	Tend	0.00747778	4.80846	1.48171	-6.00613	NS.1250.002.N706---N517.K57_P35	This study
K60	CC2	Tini	0.00747778	4.66849	2.08322	-0.702651	NS.1249.002.N701---N505.K60_P1	This study
K60	CC2	Tend	0.00747778	4.79527	1.9491	-0.850407	NS.1250.001.N711---N508.K60_P35	This study
K62	CC2	Tini	0.00747778	4.71581	2.02234	-0.735264	NS.1249.002.N702---N506.K62_P1	This study
K62	CC2	Tend	0.00747778	4.83336	1.68555	-0.859191	NS.1250.002.N705---N506.K62_P35	This study
K63	CC2	Tini	0.00747778	4.84537	1.93872	-0.53562	NS.1249.001.N703---N503.K63_P1	This study
K63	CC2	Tend	0.00747778	4.66962	1.64853	-0.90903	NS.1250.002.N708---N503.K63_P35	This study
L3	CC3	Tini	0.00804371	4.92952	2.16729		NS.1249.001.N702---N517.L3_P1	This study
L3	CC3	Tend	0.00804371	4.67098	2.11808		NS.1250.001.N706---N508.L3_P35	This study
L5	CC3	Tini	0.00804371	4.79725	1.98923		NS.1249.001.N712---N507.L5_P1	This study
L5	CC3	Tend	0.00804371	4.73988	1.98509		NS.1250.002.N706---N503.L5_P35	This study
L6	CC3	Tini	0.00804371	4.66309	1.97948		NS.1249.002.N709---N517.L6_P1	This study
L6	CC3	Tend	0.00804371	4.66161	1.87014		NS.1250.002.N709---N502.L6_P35	This study
L8	CC3	Tini	0.00804371	5.01188	2.02207		NS.1249.001.N706---N508.L8_P1	This study
L8	CC3	Tend	0.00804371	4.71521	1.84491		NS.1250.001.N710---N503.L8_P35	This study
L9	CC3	Tini	0.00804371	4.81065	2.10912		NS.1249.001.N701---N507.L9_P1	This study
L9	CC3	Tend	0.00804371	4.73672	2.30503		NS.1250.001.N702---N506.L9_P35	This study
L10	CC3	Tini	0.00804371	4.69424	2.138		NS.1249.002.N705---N502.L10_P1	This study
L10	CC3	Tend	0.00804371	4.79405	1.60331		NS.1250.001.N707---N508.L10_P35	This study
L11	CC3	Tini	0.00804371	4.76321	1.83151		NS.1249.001.N706---N507.L11_P1	This study
L11	CC3	Tend	0.00804371	4.61497	1.83486		NS.1250.002.N704---N502.L11_P35	This study
L12	CC3	Tini	0.00804371	4.7019	1.96226		NS.1249.002.N710---N503.L12_P1	This study
L12	CC3	Tend	0.00804371	4.77543	1.88875		NS.1250.001.N707---N507.L12_P35	This study
L15	CC3	Tini	0.00804371	4.86226	2.08873		NS.1249.001.N707---N504.L15_P1	This study
L15	CC3	Tend	0.00804371	4.75013	1.9956		NS.1250.002.N708---N507.L15_P35	This study
L16	CC3	Tini	0.00804371	4.72925	2.032		NS.1249.002.N710---N506.L16_P1	This study
L16	CC3	Tend	0.00804371	4.76892	1.96806		NS.1250.001.N704---N503.L16_P35	This study
L17	CC3	Tini	0.00804371	4.83785	2.17714		NS.1249.001.N705---N506.L17_P1	This study
L17	CC3	Tend	0.00804371	4.85207	2.06967		NS.1250.002.N702---N505.L17_P35	This study
L19	CC3	Tini	0.00804371	4.79083	1.99672		NS.1249.001.N710---N508.L19_P1	This study
L19	CC3	Tend	0.00804371	4.82234	1.94778		NS.1250.001.N702---N503.L19_P35	This study
L20	CC3	Tini	0.00804371	4.81375	2.07182		NS.1249.001.N702---N505.L20_P1	This study
L20	CC3	Tend	0.00804371	4.7923	2.12681		NS.1250.002.N707---N502.L20_P35	This study
L21	CC3	Tini	0.00804371	4.68857	1.91852		NS.1249.001.N704---N507.L21_P1	This study
L21	CC3	Tend	0.00804371	4.86857	1.62114		NS.1250.002.N702---N507.L21_P35	This study
L22	CC3	Tini	0.00804371	4.91276	1.92249		NS.1249.001.N710---N517.L22_P1	This study
L22	CC3	Tend	0.00804371	4.74595	2.02009		NS.1250.001.N705---N502.L22_P35	This study
L24	CC3	Tini	0.00804371	4.55912	1.50541		NS.1249.002.N707---N505.L24_P1	This study
L24	CC3	Tend	0.00804371	4.60856	2.05086		NS.1250.002.N708---N506.L24_P35	This study
L26	CC3	Tini	0.00804371	4.8749	2.08449		NS.1249.001.N711---N503.L26_P1	This study
L26	CC3	Tend	0.00804371	4.88574	2.19912		NS.1250.002.N702---N504.L26_P35	This study
L28	CC3	Tini	0.00804371	4.61538	1.98367		NS.1249.002.N706---N504.L28_P1	This study
L28	CC3	Tend	0.00804371	4.80367	1.7705		NS.1250.001.N708---N502.L28_P35	This study
L29	CC3	Tini	0.00804371	4.74372	1.57		NS.1249.001.N709---N505.L29_P1	This study
L29	CC3	Tend	0.00804371	4.92354	1.56358		NS.1250.002.N706---N506.L29_P35	This study
L34	CC3	Tini	0.00804371	4.80789	2.07867		NS.1249.001.N702---N504.L34_P1	This study
L34	CC3	Tend	0.00804371	4.68241	1.96912		NS.1250.001.N707---N517.L34_P35	This study
L37	CC3	Tini	0.00804371	4.84523	1.88021		NS.1249.001.N702---N503.L37_P1	This study
L37	CC3	Tend	0.00804371	4.84489	1.76076		NS.1250.002.N704---N508.L37_P35	This study
L38	CC3	Tini	0.00804371	4.73921	1.86559		NS.1249.002.N712---N502.L38_P1	This study
L38	CC3	Tend	0.00804371	4.66869	1.682		NS.1250.001.N707---N502.L38_P35	This study
L39	CC3	Tini	0.00804371	4.81443	2.27465		NS.1249.001.N702---N507.L39_P1	This study
L39	CC3	Tend	0.00804371	4.8204	2.14431		NS.1250.001.N710---N507.L39_P35	This study
L40	CC3	Tini	0.00804371	4.81694	2.06883		NS.1249.001.N704---N502.L40_P1	This study
L40	CC3	Tend	0.00804371	4.8276	1.95195		NS.1250.002.N705---N503.L40_P35	This study
L41	CC3	Tini	0.00804371	4.59781	2.17582		NS.1249.002.N711---N506.L41_P1	This study
L41	CC3	Tend	0.00804371	4.9666	1.6363		NS.1250.001.N702---N502.L41_P35	This study
L44	CC3	Tini	0.00804371	4.62191	1.98026		NS.1249.002.N709---N503.L44_P1	This study
L44	CC3	Tend	0.00804371	4.66319	1.87414		NS.1250.001.N709---N505.L44_P35	This study
L45	CC3	Tini	0.00804371	4.65175	1.91022		NS.1249.002.N708---N504.L45_P1	This study
L45	CC3	Tend	0.00804371	4.79221	2.13092		NS.1250.001.N708---N503.L45_P35	This study
L46	CC3	Tini	0.00804371	4.65038	1.96552		NS.1249.002.N705---N504.L46_P1	This study
L46	CC3	Tend	0.00804371	4.89145	2.08314		NS.1250.002.N711---N517.L46_P35	This study
L48	CC3	Tini	0.00804371	4.56155	2.02187		NS.1249.002.N711---N504.L48_P1	This study
L48	CC3	Tend	0.00804371	4.6877	2.04672		NS.1250.002.N708---N502.L48_P35	This study
L49	CC3	Tini	0.00804371	4.6143	2.02614		NS.1249.002.N707---N504.L49_P1	This study
L49	CC3	Tend	0.00804371	4.66644	1.65375		NS.1250.001.N704---N502.L49_P35	This study
L50	CC3	Tini	0.00804371	4.72357	2.09255		NS.1249.002.N708---N508.L50_P1	This study
L50	CC3	Tend	0.00804371	4.75534	2.03861		NS.1250.001.N706---N507.L50_P35	This study
L52	CC3	Tini	0.00804371	4.97586	1.93953		NS.1249.001.N702---N508.L52_P1	This study
L52	CC3	Tend	0.00804371	4.78793	2.16078		NS.1250.002.N711---N506.L52_P35	This study
L53	CC3	Tini	0.00804371	4.50005	1.94215		NS.1249.002.N706---N506.L53_P1	This study
L53	CC3	Tend	0.00804371	4.81669	1.75527		NS.1250.001.N702---N507.L53_P35	This study
L54	CC3	Tini	0.00804371	4.66666	1.96263		NS.1249.002.N707---N503.L54_P1	This study
L54	CC3	Tend	0.00804371	4.71873	2.31021		NS.1250.002.N701---N503.L54_P35	This study
L55	CC3	Tini	0.00804371	4.79573	1.99291		NS.1249.001.N710---N506.L55_P1	This study
L55	CC3	Tend	0.00804371	4.73112	2.14027		NS.1250.002.N709---N517.L55_P35	This study
L56	CC3	Tini	0.00804371	4.65666	1.97444		NS.1249.002.N704---N503.L56_P1	This study
L56	CC3	Tend	0.00804371	4.83652	1.98482		NS.1250.001.N712---N505.L56_P35	This study
L61	CC3	Tini	0.00804371	4.92841	1.96631		NS.1249.001.N708---N507.L61_P1	This study
L61	CC3	Tend	0.00804371	4.82889	2.20283		NS.1250.001.N710---N517.L61_P35	This study
L62	CC3	Tini	0.00804371	4.86552	2.13725		NS.1249.001.N701---N517.L62_P1	This study
L62	CC3	Tend	0.00804371	4.8002	1.55871		NS.1250.002.N710---N505.L62_P35	This study
L63	CC3	Tini	0.00804371	4.86756	1.9948		NS.1249.001.N710---N505.L63_P1	This study
L63	CC3	Tend	0.00804371	4.73341	2.1284		NS.1250.001.N708---N504.L63_P35	This study
L64	CC3	Tini	0.00804371	4.84043	2.04565		NS.1249.001.N711---N504.L64_P1	This study
L64	CC3	Tend	0.00804371	4.68866	1.91386		NS.1250.001.N707---N503.L64_P35	This study
I1	BB1	Tini	0.0174823	2.07188	0.710056	4.1578	HI.4802.002.N703---N517.I1_P1	Charron, Marsit et al. Nat Comm 2019
I1	BB1	Tend	0.0174823	2.29025	0.0919228	4.35496	HI.4803.001.N708---N508.I1_P35	Charron, Marsit et al. Nat Comm 2019
I2	BB1	Tini	0.0174823	1.90348	0.574528	4.19043	HI.4802.003.N706---N504.I2_P1	Charron, Marsit et al. Nat Comm 2019
I2	BB1	Tend	0.0174823	2.01065	0.073768	4.10674	HI.4803.002.N707---N506.I2_P35	Charron, Marsit et al. Nat Comm 2019
I3	BB1	Tini	0.0174823	2.05642	0.643822	4.24907	HI.4802.003.N701---N503.I3_P1	Charron, Marsit et al. Nat Comm 2019
I3	BB1	Tend	0.0174823	1.68241	0.97801	4.07001	HI.4803.003.N704---N503.I3_P35	Charron, Marsit et al. Nat Comm 2019
I4	BB1	Tini	0.0174823	2.00136	0.609988	4.15657	HI.4802.003.N709---N505.I4_P1	Charron, Marsit et al. Nat Comm 2019
I4	BB1	Tend	0.0174823	1.9907	0.99618	4.31208	HI.4803.003.N705---N507.I4_P35	Charron, Marsit et al. Nat Comm 2019
I5	BB1	Tini	0.0174823	2.13056	0.669964	4.11774	HI.4802.002.N707---N517.I5_P1	Charron, Marsit et al. Nat Comm 2019
I5	BB1	Tend	0.0174823	2.07984	0.661048	4.08918	HI.4803.001.N702---N508.I5_P35	Charron, Marsit et al. Nat Comm 2019
I6	BB1	Tini	0.0174823	2.11379	0.697031	4.09033	HI.4802.002.N701---N503.I6_P1	Charron, Marsit et al. Nat Comm 2019
I6	BB1	Tend	0.0174823	2.05725	0.597816	4.16972	HI.4803.003.N704---N502.I6_P35	Charron, Marsit et al. Nat Comm 2019
I7	BB1	Tini	0.0174823	2.15946	0.687191	4.04762	HI.4802.003.N711---N503.I7_P1	Charron, Marsit et al. Nat Comm 2019
I7	BB1	Tend	0.0174823	2.03578	0.614412	4.206	HI.4803.003.N708---N508.I7_P35	Charron, Marsit et al. Nat Comm 2019
I8	BB1	Tini	0.0174823	2.08225	0.670127	4.09423	HI.4802.002.N711---N508.I8_P1	Charron, Marsit et al. Nat Comm 2019
I8	BB1	Tend	0.0174823	2.17997	0.0674919	4.08445	HI.4803.002.N710---N517.I8_P35	Charron, Marsit et al. Nat Comm 2019
I11	BB1	Tini	0.0174823	2.02203	0.660936	4.16596	HI.4802.003.N706---N507.I11_P1	Charron, Marsit et al. Nat Comm 2019
I11	BB1	Tend	0.0174823	2.33508	0.620162	4.03261	HI.4803.001.N706---N504.I11_P35	Charron, Marsit et al. Nat Comm 2019
I12	BB1	Tini	0.0174823	2.10663	0.736871	4.10427	HI.4802.002.N702---N504.I12_P1	Charron, Marsit et al. Nat Comm 2019
I12	BB1	Tend	0.0174823	2.03914	0.0976145	3.92979	HI.4803.001.N706---N505.I12_P35	Charron, Marsit et al. Nat Comm 2019
I14	BB1	Tini	0.0174823	2.05769	0.699576	4.09407	HI.4802.002.N709---N507.I14_P1	Charron, Marsit et al. Nat Comm 2019
I14	BB1	Tend	0.0174823	1.9167	0.554882	4.08254	HI.4803.001.N709---N507.I14_P35	Charron, Marsit et al. Nat Comm 2019
I15	BB1	Tini	0.0174823	2.08868	0.657069	4.14596	HI.4802.002.N702---N502.I15_P1	Charron, Marsit et al. Nat Comm 2019
I15	BB1	Tend	0.0174823	2.16975	0.67079	4.10542	HI.4803.002.N704---N503.I15_P35	Charron, Marsit et al. Nat Comm 2019
I16	BB1	Tini	0.0174823	2.00996	0.643176	4.12453	HI.4802.003.N702---N505.I16_P1	Charron, Marsit et al. Nat Comm 2019
I16	BB1	Tend	0.0174823	1.45665	1.04856	3.89212	HI.4803.003.N708---N502.I16_P35	Charron, Marsit et al. Nat Comm 2019
I18	BB1	Tini	0.0174823	2.17656	0.651664	4.13942	HI.4802.003.N703---N508.I18_P1	Charron, Marsit et al. Nat Comm 2019
I18	BB1	Tend	0.0174823	2.08465	0.599226	4.09697	HI.4803.003.N708---N504.I18_P35	Charron, Marsit et al. Nat Comm 2019
I19	BB1	Tini	0.0174823	2.16584	0.688516	4.00478	HI.4802.002.N712---N502.I19_P1	Charron, Marsit et al. Nat Comm 2019
I19	BB1	Tend	0.0174823	2.18623	0.700799	4.07548	HI.4803.002.N710---N505.I19_P35	Charron, Marsit et al. Nat Comm 2019
I21	BB1	Tini	0.0174823	2.11925	0.712289	4.08609	HI.4802.001.N702---N507.I21_P1	Charron, Marsit et al. Nat Comm 2019
I21	BB1	Tend	0.0174823	2.12628	0.690354	4.03692	HI.4803.001.N704---N503.I21_P35	Charron, Marsit et al. Nat Comm 2019
I22	BB1	Tini	0.0174823	2.12346	0.688738	4.07273	HI.4802.001.N710---N504.I22_P1	Charron, Marsit et al. Nat Comm 2019
I22	BB1	Tend	0.0174823	2.00756	0.593839	4.16025	HI.4803.003.N710---N507.I22_P35	Charron, Marsit et al. Nat Comm 2019
I23	BB1	Tini	0.0174823	2.1681	0.73086	4.06537	HI.4802.001.N710---N508.I23_P1	Charron, Marsit et al. Nat Comm 2019
I23	BB1	Tend	0.0174823	2.14157	0.659179	4.28596	HI.4803.002.N707---N505.I23_P35	Charron, Marsit et al. Nat Comm 2019
I24	BB1	Tini	0.0174823	2.13423	1.26961	3.90759	NS.1249.002.N701---N507.I24_P1	Charron, Marsit et al. Nat Comm 2019
I24	BB1	Tend	0.0174823	2.39553	1.13249	3.90649	NS.1250.001.N706---N506.I24_P35	Charron, Marsit et al. Nat Comm 2019
I25	BB1	Tini	0.0174823	2.09834	0.771789	4.07742	HI.4802.001.N702---N504.I25_P1	Charron, Marsit et al. Nat Comm 2019
I25	BB1	Tend	0.0174823	2.71614	0.56653	3.85071	HI.4803.001.N704---N504.I25_P35	Charron, Marsit et al. Nat Comm 2019
I26	BB1	Tini	0.0174823	2.1312	0.733517	3.98869	HI.4802.001.N704---N506.I26_P1	Charron, Marsit et al. Nat Comm 2019
I26	BB1	Tend	0.0174823	2.114	0.759039	4.03153	HI.4803.001.N710---N502.I26_P35	Charron, Marsit et al. Nat Comm 2019
I27	BB1	Tini	0.0174823	2.32503	0.828771	4.04001	NS.1249.002.N702---N517.I27_P1	Charron, Marsit et al. Nat Comm 2019
I27	BB1	Tend	0.0174823	2.42187	1.23581	4.00341	NS.1250.001.N701---N504.I27_P35	Charron, Marsit et al. Nat Comm 2019
I28	BB1	Tini	0.0174823	2.22528	0.701715	4.01359	HI.4802.001.N704---N507.I28_P1	Charron, Marsit et al. Nat Comm 2019
I28	BB1	Tend	0.0174823	1.94836	0.69749	4.16098	HI.4803.002.N710---N506.I28_P35	Charron, Marsit et al. Nat Comm 2019
I29	BB1	Tini	0.0174823	2.15784	0.819518	4.31351	HI.4802.001.N701---N506.I29_P1	Charron, Marsit et al. Nat Comm 2019
I29	BB1	Tend	0.0174823	2.09691	0.213291	3.88572	HI.4803.001.N703---N517.I29_P35	Charron, Marsit et al. Nat Comm 2019
I31	BB1	Tini	0.0174823	1.87517	0.612133	4.12376	HI.4802.002.N704---N505.I31_P1	Charron, Marsit et al. Nat Comm 2019
I31	BB1	Tend	0.0174823	2.06413	0.770398	4.03779	HI.4803.001.N707---N502.I31_P35	Charron, Marsit et al. Nat Comm 2019
I33	BB1	Tini	0.0174823	2.04488	0.638253	4.06217	HI.4802.003.N709---N507.I33_P1	Charron, Marsit et al. Nat Comm 2019
I33	BB1	Tend	0.0174823	2.24149	1.33742	4.11924	HI.4803.001.N711---N506.I33_P35	Charron, Marsit et al. Nat Comm 2019
I35	BB1	Tini	0.0174823	2.116	0.689379	4.04504	HI.4802.002.N706---N517.I35_P1	Charron, Marsit et al. Nat Comm 2019
I35	BB1	Tend	0.0174823	2.23756	0.720288	4.16406	HI.4803.001.N709---N502.I35_P35	Charron, Marsit et al. Nat Comm 2019
I36	BB1	Tini	0.0174823	2.08571	0.660277	4.22624	HI.4802.003.N707---N505.I36_P1	Charron, Marsit et al. Nat Comm 2019
I36	BB1	Tend	0.0174823	2.06024	0.611106	4.26047	HI.4803.003.N707---N517.I36_P35	Charron, Marsit et al. Nat Comm 2019
I37	BB1	Tini	0.0174823	2.01649	0.686221	4.07754	HI.4802.002.N704---N508.I37_P1	Charron, Marsit et al. Nat Comm 2019
I37	BB1	Tend	0.0174823	2.3009	0.548212	3.90335	HI.4803.003.N709---N517.I37_P35	Charron, Marsit et al. Nat Comm 2019
I38	BB1	Tini	0.0174823	2.13074	0.752664	4.0084	HI.4802.001.N701---N503.I38_P1	Charron, Marsit et al. Nat Comm 2019
I38	BB1	Tend	0.0174823	2.3259	0.578967	4.18637	HI.4803.002.N701---N504.I38_P35	Charron, Marsit et al. Nat Comm 2019
I40	BB1	Tini	0.0174823	2.09986	0.701532	4.15462	HI.4802.002.N703---N503.I40_P1	Charron, Marsit et al. Nat Comm 2019
I40	BB1	Tend	0.0174823	2.17276	0.671722	4.22242	HI.4803.002.N707---N517.I40_P35	Charron, Marsit et al. Nat Comm 2019
I42	BB1	Tini	0.0174823	2.09127	0.709404	4.13343	HI.4802.002.N707---N507.I42_P1	Charron, Marsit et al. Nat Comm 2019
I42	BB1	Tend	0.0174823	2.24365	0.683345	4.19624	HI.4803.002.N710---N502.I42_P35	Charron, Marsit et al. Nat Comm 2019
I43	BB1	Tini	0.0174823	2.00307	0.655657	4.1786	HI.4802.002.N709---N508.I43_P1	Charron, Marsit et al. Nat Comm 2019
I43	BB1	Tend	0.0174823	2.05685	0.674474	4.17634	HI.4803.003.N701---N508.I43_P35	Charron, Marsit et al. Nat Comm 2019
I45	BB1	Tini	0.0174823	2.13046	0.751243	3.96906	HI.4802.001.N712---N508.I45_P1	Charron, Marsit et al. Nat Comm 2019
I45	BB1	Tend	0.0174823	2.46327	0.741568	4.33424	HI.4803.002.N711---N506.I45_P35	Charron, Marsit et al. Nat Comm 2019
I46	BB1	Tini	0.0174823	2.1808	0.752234	4.07811	HI.4802.001.N705---N502.I46_P1	Charron, Marsit et al. Nat Comm 2019
I46	BB1	Tend	0.0174823	1.91902	1.16638	3.95192	HI.4803.001.N703---N508.I46_P35	Charron, Marsit et al. Nat Comm 2019
I47	BB1	Tini	0.0174823	2.0253	0.659764	4.22423	HI.4802.003.N703---N507.I47_P1	Charron, Marsit et al. Nat Comm 2019
I47	BB1	Tend	0.0174823	1.86549	0.700675	4.08729	HI.4803.001.N709---N503.I47_P35	Charron, Marsit et al. Nat Comm 2019
I48	BB1	Tini	0.0174823	2.18975	0.69988	4.10065	HI.4802.001.N703---N502.I48_P1	Charron, Marsit et al. Nat Comm 2019
I48	BB1	Tend	0.0174823	2.12419	0.584458	4.11844	HI.4803.003.N710---N504.I48_P35	Charron, Marsit et al. Nat Comm 2019
H1	BB2	Tini	0.022708	1.67989	0.149378	4.32818	HI.4802.001.N701---N517.H1_P1	Charron, Marsit et al. Nat Comm 2019
H1	BB2	Tend	0.022708	1.64029	0.015433	4.43131	HI.4803.001.N707---N505.H1_P35	Charron, Marsit et al. Nat Comm 2019
H2	BB2	Tini	0.022708	1.55852	-0.0128354	4.50852	HI.4802.003.N708---N505.H2_P1	Charron, Marsit et al. Nat Comm 2019
H2	BB2	Tend	0.022708	1.6202	-0.839235	4.51067	HI.4803.003.N704---N507.H2_P35	Charron, Marsit et al. Nat Comm 2019
H3	BB2	Tini	0.022708	1.58232	-0.0241759	4.52741	HI.4802.003.N701---N504.H3_P1	Charron, Marsit et al. Nat Comm 2019
H3	BB2	Tend	0.022708	2.10338	-0.150042	4.29698	HI.4803.002.N712---N503.H3_P35	Charron, Marsit et al. Nat Comm 2019
H6	BB2	Tini	0.022708	1.52342	-0.00382353	4.46074	HI.4802.003.N704---N504.H6_P1	Charron, Marsit et al. Nat Comm 2019
H6	BB2	Tend	0.022708	1.66227	-0.0211699	4.64656	HI.4803.002.N705---N506.H6_P35	Charron, Marsit et al. Nat Comm 2019
H8	BB2	Tini	0.022708	1.61537	-0.00201338	4.41354	HI.4802.002.N712---N504.H8_P1	Charron, Marsit et al. Nat Comm 2019
H8	BB2	Tend	0.022708	1.61663	-0.0341322	4.51245	HI.4803.003.N711---N506.H8_P35	Charron, Marsit et al. Nat Comm 2019
H9	BB2	Tini	0.022708	1.68922	0.0751087	4.42329	HI.4802.001.N703---N505.H9_P1	Charron, Marsit et al. Nat Comm 2019
H9	BB2	Tend	0.022708	2.09425	0.0510859	4.48704	HI.4803.001.N701---N507.H9_P35	Charron, Marsit et al. Nat Comm 2019
H11	BB2	Tini	0.022708	1.66659	0.133714	4.38648	HI.4802.001.N702---N505.H11_P1	Charron, Marsit et al. Nat Comm 2019
H11	BB2	Tend	0.022708	1.63234	0.0473816	4.45191	HI.4803.001.N710---N508.H11_P35	Charron, Marsit et al. Nat Comm 2019
H12	BB2	Tini	0.022708	1.54984	-0.0217069	4.48168	HI.4802.003.N710---N506.H12_P1	Charron, Marsit et al. Nat Comm 2019
H12	BB2	Tend	0.022708	0.972822	-0.136803	4.31154	HI.4803.003.N707---N507.H12_P35	Charron, Marsit et al. Nat Comm 2019
H13	BB2	Tini	0.022708	1.07254	0.122726	4.42291	HI.4802.002.N707---N506.H13_P1	Charron, Marsit et al. Nat Comm 2019
H13	BB2	Tend	0.022708	1.02647	0.148646	4.32541	HI.4803.001.N712---N517.H13_P35	Charron, Marsit et al. Nat Comm 2019
H14	BB2	Tini	0.022708	1.69908	0.0959154	4.37177	HI.4802.001.N705---N508.H14_P1	Charron, Marsit et al. Nat Comm 2019
H14	BB2	Tend	0.022708	2.12677	0.00317184	4.45113	HI.4803.001.N701---N502.H14_P35	Charron, Marsit et al. Nat Comm 2019
H16	BB2	Tini	0.022708	0.959852	0.631798	4.49365	HI.4802.002.N701---N507.H16_P1	Charron, Marsit et al. Nat Comm 2019
H16	BB2	Tend	0.022708	1.43917	0.401297	4.49596	HI.4803.003.N707---N504.H16_P35	Charron, Marsit et al. Nat Comm 2019
H17	BB2	Tini	0.022708	1.55565	0.0794394	4.48664	HI.4802.002.N706---N507.H17_P1	Charron, Marsit et al. Nat Comm 2019
H17	BB2	Tend	0.022708	1.63021	0.0542638	4.44144	HI.4803.001.N707---N508.H17_P35	Charron, Marsit et al. Nat Comm 2019
H18	BB2	Tini	0.022708	1.6252	0.144258	4.44724	HI.4802.001.N710---N503.H18_P1	Charron, Marsit et al. Nat Comm 2019
H18	BB2	Tend	0.022708	1.74875	-0.0726497	4.57752	HI.4803.002.N703---N507.H18_P35	Charron, Marsit et al. Nat Comm 2019
H19	BB2	Tini	0.022708	1.6644	-0.506768	4.60419	HI.4802.003.N712---N503.H19_P1	Charron, Marsit et al. Nat Comm 2019
H19	BB2	Tend	0.022708	1.83883	-0.161165	4.55547	HI.4803.002.N702---N507.H19_P35	Charron, Marsit et al. Nat Comm 2019
H20	BB2	Tini	0.022708	1.50224	0.00163096	4.39801	HI.4802.003.N708---N517.H20_P1	Charron, Marsit et al. Nat Comm 2019
H20	BB2	Tend	0.022708	1.81592	-0.184077	4.60726	HI.4803.002.N702---N505.H20_P35	Charron, Marsit et al. Nat Comm 2019
H21	BB2	Tini	0.022708	1.5106	0.0593283	4.52012	HI.4802.003.N703---N505.H21_P1	Charron, Marsit et al. Nat Comm 2019
H21	BB2	Tend	0.022708	1.30432	0.0623462	4.20979	HI.4803.001.N712---N502.H21_P35	Charron, Marsit et al. Nat Comm 2019
H23	BB2	Tini	0.022708	1.68356	-0.0308744	4.4767	HI.4802.003.N709---N506.H23_P1	Charron, Marsit et al. Nat Comm 2019
H23	BB2	Tend	0.022708	1.58299	-0.0194556	4.30335	HI.4803.001.N706---N517.H23_P35	Charron, Marsit et al. Nat Comm 2019
H24	BB2	Tini	0.022708	1.66886	0.155026	4.39353	HI.4802.001.N708---N504.H24_P1	Charron, Marsit et al. Nat Comm 2019
H24	BB2	Tend	0.022708	1.77382	-0.120993	4.50014	HI.4803.002.N711---N502.H24_P35	Charron, Marsit et al. Nat Comm 2019
H25	BB2	Tini	0.022708	1.67625	0.184811	4.46106	HI.4802.002.N707---N508.H25_P1	Charron, Marsit et al. Nat Comm 2019
H25	BB2	Tend	0.022708	1.57158	0.00487896	4.64219	HI.4803.003.N707---N505.H25_P35	Charron, Marsit et al. Nat Comm 2019
H26	BB2	Tini	0.022708	1.6761	0.0746474	4.33128	HI.4802.002.N712---N507.H26_P1	Charron, Marsit et al. Nat Comm 2019
H26	BB2	Tend	0.022708	1.59706	-0.0315332	4.53111	HI.4803.001.N709---N504.H26_P35	Charron, Marsit et al. Nat Comm 2019
H27	BB2	Tini	0.022708	1.14038	0.183965	4.2875	HI.4802.001.N704---N508.H27_P1	Charron, Marsit et al. Nat Comm 2019
H27	BB2	Tend	0.022708	1.05719	-0.0060073	4.43123	HI.4803.003.N708---N503.H27_P35	Charron, Marsit et al. Nat Comm 2019
H28	BB2	Tini	0.022708	1.8471	0.090073	4.49334	NS.1249.002.N703---N506.H28_P1	Charron, Marsit et al. Nat Comm 2019
H28	BB2	Tend	0.022708	2.23663	0.123422	4.68904	NS.1250.001.N707---N505.H28_P35	Charron, Marsit et al. Nat Comm 2019
H29	BB2	Tini	0.022708	1.40143	0.104815	4.45572	HI.4802.002.N705---N503.H29_P1	Charron, Marsit et al. Nat Comm 2019
H29	BB2	Tend	0.022708	2.25081	0.00896632	4.71052	HI.4803.003.N707---N503.H29_P35	Charron, Marsit et al. Nat Comm 2019
H30	BB2	Tini	0.022708	1.46742	-0.11075	4.55409	HI.4802.003.N704---N506.H30_P1	Charron, Marsit et al. Nat Comm 2019
H30	BB2	Tend	0.022708	1.72442	-0.0849777	4.43236	HI.4803.003.N703---N517.H30_P35	Charron, Marsit et al. Nat Comm 2019
H31	BB2	Tini	0.022708	1.57053	-0.0010079	4.55244	HI.4802.003.N704---N505.H31_P1	Charron, Marsit et al. Nat Comm 2019
H31	BB2	Tend	0.022708	1.59619	0.0881334	4.39759	HI.4803.001.N711---N505.H31_P35	Charron, Marsit et al. Nat Comm 2019
H32	BB2	Tini	0.022708	1.69312	0.140783	4.4062	HI.4802.001.N703---N504.H32_P1	Charron, Marsit et al. Nat Comm 2019
H32	BB2	Tend	0.022708	1.82467	-0.0585118	4.70135	HI.4803.002.N706---N508.H32_P35	Charron, Marsit et al. Nat Comm 2019
H33	BB2	Tini	0.022708	1.66807	0.0831081	4.32045	HI.4802.001.N709---N517.H33_P1	Charron, Marsit et al. Nat Comm 2019
H33	BB2	Tend	0.022708	1.63418	0.0606225	4.25247	HI.4803.001.N711---N502.H33_P35	Charron, Marsit et al. Nat Comm 2019
H37	BB2	Tini	0.022708	1.68214	0.0525093	4.42919	HI.4802.001.N711---N502.H37_P1	Charron, Marsit et al. Nat Comm 2019
H37	BB2	Tend	0.022708	2.0804	-0.0176343	4.55032	HI.4803.003.N710---N503.H37_P35	Charron, Marsit et al. Nat Comm 2019
H38	BB2	Tini	0.022708	1.77083	0.248404	4.61743	NS.1249.001.N709---N503.H38_P1	Charron, Marsit et al. Nat Comm 2019
H38	BB2	Tend	0.022708	1.56849	0.259007	4.5213	NS.1250.001.N705---N508.H38_P35	Charron, Marsit et al. Nat Comm 2019
H40	BB2	Tini	0.022708	1.67701	0.164719	4.42775	HI.4802.001.N710---N506.H40_P1	Charron, Marsit et al. Nat Comm 2019
H40	BB2	Tend	0.022708	1.57313	-0.108827	4.63099	HI.4803.003.N704---N508.H40_P35	Charron, Marsit et al. Nat Comm 2019
H41	BB2	Tini	0.022708	0.886771	-0.269349	4.41595	HI.4802.002.N708---N508.H41_P1	Charron, Marsit et al. Nat Comm 2019
H41	BB2	Tend	0.022708	1.01641	0.0495722	4.3428	HI.4803.003.N705---N506.H41_P35	Charron, Marsit et al. Nat Comm 2019
H43	BB2	Tini	0.022708	1.79337	0.0219944	4.43936	HI.4802.003.N701---N502.H43_P1	Charron, Marsit et al. Nat Comm 2019
H43	BB2	Tend	0.022708	1.04298	0.0534679	4.25783	HI.4803.003.N709---N502.H43_P35	Charron, Marsit et al. Nat Comm 2019
H44	BB2	Tini	0.022708	1.61864	0.008585	4.46456	HI.4802.003.N703---N503.H44_P1	Charron, Marsit et al. Nat Comm 2019
H44	BB2	Tend	0.022708	1.99768	0.161758	4.3934	HI.4803.001.N708---N505.H44_P35	Charron, Marsit et al. Nat Comm 2019
H45	BB2	Tini	0.022708	1.59429	0.0721915	4.49846	HI.4802.002.N702---N506.H45_P1	Charron, Marsit et al. Nat Comm 2019
H45	BB2	Tend	0.022708	2.21096	-0.0415196	4.55303	HI.4803.003.N711---N502.H45_P35	Charron, Marsit et al. Nat Comm 2019
H46	BB2	Tini	0.022708	1.73038	0.220452	4.55456	HI.4802.001.N707---N502.H46_P1	Charron, Marsit et al. Nat Comm 2019
H46	BB2	Tend	0.022708	2.24961	-0.0853741	4.64255	HI.4803.002.N702---N517.H46_P35	Charron, Marsit et al. Nat Comm 2019
H47	BB2	Tini	0.022708	1.56621	0.0995906	4.54126	HI.4802.002.N702---N517.H47_P1	Charron, Marsit et al. Nat Comm 2019
H47	BB2	Tend	0.022708	1.34851	0.0178689	4.47531	HI.4803.003.N702---N506.H47_P35	Charron, Marsit et al. Nat Comm 2019
H48	BB2	Tini	0.022708	1.60646	-0.00149597	4.44205	HI.4802.003.N706---N503.H48_P1	Charron, Marsit et al. Nat Comm 2019
H48	BB2	Tend	0.022708	1.71801	-0.00809156	4.60121	HI.4803.002.N705---N504.H48_P35	Charron, Marsit et al. Nat Comm 2019
A1	BC1	Tini	0.211957	4.08127	1.64813	1.04327	NS.1249.002.N709---N502.A1_P1	Charron, Marsit et al. Nat Comm 2019
A1	BC1	Tend	0.211957	3.98195	1.28339	1.18865	NS.1250.002.N705---N504.A1_P35	Charron, Marsit et al. Nat Comm 2019
A4	BC1	Tini	0.211957	4.04052	1.60009	1.24586	NS.1249.001.N702---N506.A4_P1	Charron, Marsit et al. Nat Comm 2019
A4	BC1	Tend	0.211957	4.17244	1.75541	0.70478	NS.1250.001.N701---N507.A4_P35	Charron, Marsit et al. Nat Comm 2019
A6	BC1	Tini	0.211957	4.14958	1.4792	1.12625	HI.4802.003.N703---N504.A6_P1	Charron, Marsit et al. Nat Comm 2019
A6	BC1	Tend	0.211957	4.13222	1.18042	1.19522	HI.4803.001.N710---N506.A6_P35	Charron, Marsit et al. Nat Comm 2019
A13	BC1	Tini	0.211957	4.2508	1.56988	1.06521	NS.1249.002.N702---N507.A13_P1	Charron, Marsit et al. Nat Comm 2019
A13	BC1	Tend	0.211957	4.06823	1.53326	1.02762	NS.1250.002.N709---N505.A13_P35	Charron, Marsit et al. Nat Comm 2019
A17	BC1	Tini	0.211957	4.03476	1.45735	1.15177	HI.4802.003.N707---N503.A17_P1	Charron, Marsit et al. Nat Comm 2019
A17	BC1	Tend	0.211957	3.886	1.4447	1.13238	HI.4803.003.N704---N517.A17_P35	Charron, Marsit et al. Nat Comm 2019
A27	BC1	Tini	0.211957	4.02926	1.55786	1.1094	NS.1249.002.N706---N507.A27_P1	Charron, Marsit et al. Nat Comm 2019
A27	BC1	Tend	0.211957	4.17478	1.48218	1.12034	NS.1250.002.N710---N506.A27_P35	Charron, Marsit et al. Nat Comm 2019
A30	BC1	Tini	0.211957	4.10493	1.6247	1.05469	HI.4802.003.N705---N508.A30_P1	Charron, Marsit et al. Nat Comm 2019
A30	BC1	Tend	0.211957	4.13002	1.58463	1.0992	HI.4803.003.N707---N506.A30_P35	Charron, Marsit et al. Nat Comm 2019
A32	BC1	Tini	0.211957	4.26134	1.55582	1.0647	NS.1249.002.N707---N508.A32_P1	Charron, Marsit et al. Nat Comm 2019
A32	BC1	Tend	0.211957	3.98431	1.88849	1.03246	NS.1250.001.N709---N508.A32_P35	Charron, Marsit et al. Nat Comm 2019
A34	BC1	Tini	0.211957	3.88056	1.54803	1.10841	HI.4802.002.N709---N503.A34_P1	Charron, Marsit et al. Nat Comm 2019
A34	BC1	Tend	0.211957	3.96191	1.50742	1.08149	HI.4803.003.N710---N505.A34_P35	Charron, Marsit et al. Nat Comm 2019
A41	BC1	Tini	0.211957	4.1097	1.46914	0.998069	HI.4802.003.N707---N507.A41_P1	Charron, Marsit et al. Nat Comm 2019
A41	BC1	Tend	0.211957	3.91375	1.63746	0.922189	HI.4803.001.N712---N503.A41_P35	Charron, Marsit et al. Nat Comm 2019
A42	BC1	Tini	0.211957	4.31172	1.64566	1.1807	NS.1249.001.N704---N517.A42_P1	Charron, Marsit et al. Nat Comm 2019
A42	BC1	Tend	0.211957	4.14454	1.67123	0.926385	NS.1250.001.N710---N508.A42_P35	Charron, Marsit et al. Nat Comm 2019
A45	BC1	Tini	0.211957	4.06426	1.49754	1.10286	NS.1249.002.N706---N502.A45_P1	Charron, Marsit et al. Nat Comm 2019
A45	BC1	Tend	0.211957	4.051	1.49749	1.14699	NS.1250.002.N704---N505.A45_P35	Charron, Marsit et al. Nat Comm 2019
A46	BC1	Tini	0.211957	4.10255	1.58031	1.04642	NS.1249.002.N702---N503.A46_P1	Charron, Marsit et al. Nat Comm 2019
A46	BC1	Tend	0.211957	4.10203	1.58809	1.47638	NS.1250.002.N707---N504.A46_P35	Charron, Marsit et al. Nat Comm 2019
A49	BC1	Tini	0.211957	4.30238	1.76791	1.149	NS.1249.001.N701---N506.A49_P1	Charron, Marsit et al. Nat Comm 2019
A49	BC1	Tend	0.211957	3.92821	1.66808	0.706383	NS.1250.001.N702---N508.A49_P35	Charron, Marsit et al. Nat Comm 2019
A59	BC1	Tini	0.211957	4.0453	1.6796	1.21011	NS.1249.002.N703---N507.A59_P1	Charron, Marsit et al. Nat Comm 2019
A59	BC1	Tend	0.211957	4.19554	1.65118	1.12852	NS.1250.002.N701---N506.A59_P35	Charron, Marsit et al. Nat Comm 2019
A61	BC1	Tini	0.211957	4.30861	1.57902	1.09359	HI.4802.001.N703---N506.A61_P1	Charron, Marsit et al. Nat Comm 2019
A61	BC1	Tend	0.211957	4.23736	1.45593	1.46737	HI.4803.003.N706---N507.A61_P35	Charron, Marsit et al. Nat Comm 2019
A63	BC1	Tini	0.211957	4.02067	1.46042	1.38785	NS.1249.001.N705---N507.A63_P1	Charron, Marsit et al. Nat Comm 2019
A63	BC1	Tend	0.211957	3.85753	1.4549	1.21927	NS.1250.001.N707---N504.A63_P35	Charron, Marsit et al. Nat Comm 2019
A67	BC1	Tini	0.211957	4.04368	1.45302	1.04935	HI.4802.003.N705---N502.A67_P1	Charron, Marsit et al. Nat Comm 2019
A67	BC1	Tend	0.211957	3.89293	1.6208	1.07397	HI.4803.003.N709---N506.A67_P35	Charron, Marsit et al. Nat Comm 2019
A68	BC1	Tini	0.211957	3.9279	1.48516	1.11076	HI.4802.003.N711---N506.A68_P1	Charron, Marsit et al. Nat Comm 2019
A68	BC1	Tend	0.211957	3.91122	1.47904	1.10193	HI.4803.003.N706---N505.A68_P35	Charron, Marsit et al. Nat Comm 2019
A70	BC1	Tini	0.211957	4.08223	1.50237	1.07269	HI.4802.002.N712---N503.A70_P1	Charron, Marsit et al. Nat Comm 2019
A70	BC1	Tend	0.211957	3.97232	1.26598	1.537	HI.4803.002.N703---N504.A70_P35	Charron, Marsit et al. Nat Comm 2019
A82	BC1	Tini	0.211957	4.03967	1.46152	1.09177	HI.4802.003.N704---N517.A82_P1	Charron, Marsit et al. Nat Comm 2019
A82	BC1	Tend	0.211957	3.65618	1.34356	2.65872	HI.4803.001.N708---N503.A82_P35	Charron, Marsit et al. Nat Comm 2019
A88	BC1	Tini	0.211957	3.88706	1.28602	1.13617	HI.4802.002.N711---N502.A88_P1	Charron, Marsit et al. Nat Comm 2019
A88	BC1	Tend	0.211957	3.76439	1.21534	2.12591	HI.4803.002.N712---N506.A88_P35	Charron, Marsit et al. Nat Comm 2019
A92	BC1	Tini	0.211957	4.25996	1.60923	1.19419	NS.1249.001.N710---N503.A92_P1	Charron, Marsit et al. Nat Comm 2019
A92	BC1	Tend	0.211957	3.86649	1.6095	0.940704	NS.1250.001.N712---N506.A92_P35	Charron, Marsit et al. Nat Comm 2019
D3	BC2	Tini	0.210731	3.85908	1.08965		NS.1249.001.N706---N506.D3_P1	Charron, Marsit et al. Nat Comm 2019
D3	BC2	Tend	0.210731	3.87416	1.09685		NS.1250.001.N702---N505.D3_P35	Charron, Marsit et al. Nat Comm 2019
D8	BC2	Tini	0.210731	3.96981	0.729871		NS.1249.001.N704---N505.D8_P1	Charron, Marsit et al. Nat Comm 2019
D8	BC2	Tend	0.210731	3.83428	0.661334		NS.1250.002.N709---N506.D8_P35	Charron, Marsit et al. Nat Comm 2019
D12	BC2	Tini	0.210731	3.83124	0.995346		HI.4802.001.N711---N505.D12_P1	Charron, Marsit et al. Nat Comm 2019
D12	BC2	Tend	0.210731	3.91811	0.869297		HI.4803.001.N701---N517.D12_P35	Charron, Marsit et al. Nat Comm 2019
D23	BC2	Tini	0.210731	3.81901	0.994842		NS.1249.002.N707---N506.D23_P1	Charron, Marsit et al. Nat Comm 2019
D23	BC2	Tend	0.210731	4.03544	1.07807		NS.1250.001.N711---N506.D23_P35	Charron, Marsit et al. Nat Comm 2019
D28	BC2	Tini	0.210731	3.75441	0.968689		NS.1249.002.N709---N504.D28_P1	Charron, Marsit et al. Nat Comm 2019
D28	BC2	Tend	0.210731	3.76928	0.919678		NS.1250.002.N706---N507.D28_P35	Charron, Marsit et al. Nat Comm 2019
D29	BC2	Tini	0.210731	3.79842	0.958414		HI.4802.002.N709---N517.D29_P1	Charron, Marsit et al. Nat Comm 2019
D29	BC2	Tend	0.210731	3.81998	0.562001		HI.4803.003.N705---N504.D29_P35	Charron, Marsit et al. Nat Comm 2019
D38	BC2	Tini	0.210731	3.66732	0.941753		HI.4802.003.N706---N508.D38_P1	Charron, Marsit et al. Nat Comm 2019
D38	BC2	Tend	0.210731	3.75897	0.865023		HI.4803.002.N709---N503.D38_P35	Charron, Marsit et al. Nat Comm 2019
D39	BC2	Tini	0.210731	3.75011	1.005		NS.1249.002.N704---N505.D39_P1	Charron, Marsit et al. Nat Comm 2019
D39	BC2	Tend	0.210731	3.69536	0.633678		NS.1250.002.N708---N517.D39_P35	Charron, Marsit et al. Nat Comm 2019
D41	BC2	Tini	0.210731	3.89644	1.17734		NS.1249.001.N705---N504.D41_P1	Charron, Marsit et al. Nat Comm 2019
D41	BC2	Tend	0.210731	4.00579	1.07309		NS.1250.001.N710---N506.D41_P35	Charron, Marsit et al. Nat Comm 2019
D42	BC2	Tini	0.210731	3.8372	1.02656		HI.4802.002.N701---N502.D42_P1	Charron, Marsit et al. Nat Comm 2019
D42	BC2	Tend	0.210731	3.99381	1.36987		HI.4803.001.N701---N504.D42_P35	Charron, Marsit et al. Nat Comm 2019
D49	BC2	Tini	0.210731	3.73287	0.986588		NS.1249.002.N709---N505.D49_P1	Charron, Marsit et al. Nat Comm 2019
D49	BC2	Tend	0.210731	3.80197	0.692084		NS.1250.001.N702---N504.D49_P35	Charron, Marsit et al. Nat Comm 2019
D50	BC2	Tini	0.210731	4.06474	1.27696		NS.1249.001.N705---N508.D50_P1	Charron, Marsit et al. Nat Comm 2019
D50	BC2	Tend	0.210731	3.98795	1.05659		NS.1250.002.N710---N517.D50_P35	Charron, Marsit et al. Nat Comm 2019
D51	BC2	Tini	0.210731	3.84558	0.946807		HI.4802.001.N701---N505.D51_P1	Charron, Marsit et al. Nat Comm 2019
D51	BC2	Tend	0.210731	3.91152	0.786508		HI.4803.002.N703---N502.D51_P35	Charron, Marsit et al. Nat Comm 2019
D56	BC2	Tini	0.210731	3.94327	1.12827		NS.1249.001.N705---N502.D56_P1	Charron, Marsit et al. Nat Comm 2019
D56	BC2	Tend	0.210731	3.67581	1.15051		NS.1250.002.N711---N504.D56_P35	Charron, Marsit et al. Nat Comm 2019
D57	BC2	Tini	0.210731	3.78547	0.970056		HI.4802.001.N711---N517.D57_P1	Charron, Marsit et al. Nat Comm 2019
D57	BC2	Tend	0.210731	4.07599	1.02361		HI.4803.001.N703---N505.D57_P35	Charron, Marsit et al. Nat Comm 2019
D63	BC2	Tini	0.210731	3.83104	0.921239		HI.4802.002.N701---N504.D63_P1	Charron, Marsit et al. Nat Comm 2019
D63	BC2	Tend	0.210731	3.75931	-0.119467		HI.4803.003.N702---N502.D63_P35	Charron, Marsit et al. Nat Comm 2019
D68	BC2	Tini	0.210731	3.85821	1.00912		HI.4802.003.N707---N517.D68_P1	Charron, Marsit et al. Nat Comm 2019
D68	BC2	Tend	0.210731	4.05617	0.89479		HI.4803.001.N701---N503.D68_P35	Charron, Marsit et al. Nat Comm 2019
D71	BC2	Tini	0.210731	3.72113	1.08954		NS.1249.002.N708---N505.D71_P1	Charron, Marsit et al. Nat Comm 2019
D71	BC2	Tend	0.210731	3.99428	1.03552		NS.1250.002.N708---N508.D71_P35	Charron, Marsit et al. Nat Comm 2019
D72	BC2	Tini	0.210731	3.80761	1.07821		NS.1249.002.N703---N517.D72_P1	Charron, Marsit et al. Nat Comm 2019
D72	BC2	Tend	0.210731	3.89679	0.626801		NS.1250.001.N703---N502.D72_P35	Charron, Marsit et al. Nat Comm 2019
D73	BC2	Tini	0.210731	3.84333	0.667564		HI.4802.002.N708---N517.D73_P1	Charron, Marsit et al. Nat Comm 2019
D73	BC2	Tend	0.210731	3.87588	0.603816		HI.4803.001.N701---N506.D73_P35	Charron, Marsit et al. Nat Comm 2019
D75	BC2	Tini	0.210731	3.65391	0.955753		HI.4802.003.N704---N503.D75_P1	Charron, Marsit et al. Nat Comm 2019
D75	BC2	Tend	0.210731	3.94039	0.895992		HI.4803.002.N705---N505.D75_P35	Charron, Marsit et al. Nat Comm 2019
D86	BC2	Tini	0.210731	3.85205	1.01769		HI.4802.002.N707---N503.D86_P1	Charron, Marsit et al. Nat Comm 2019
D86	BC2	Tend	0.210731	3.81263	0.922305		HI.4803.002.N704---N517.D86_P35	Charron, Marsit et al. Nat Comm 2019
D95	BC2	Tini	0.210731	3.65196	1.02911		NS.1249.002.N703---N504.D95_P1	Charron, Marsit et al. Nat Comm 2019
D95	BC2	Tend	0.210731	3.75591	0.68642		NS.1250.001.N709---N504.D95_P35	Charron, Marsit et al. Nat Comm 2019
B1	BA1	Tini	0.45018	3.65646	0.838045	1.16441	HI.4802.001.N707---N506.B1_P1	Charron, Marsit et al. Nat Comm 2019
B1	BA1	Tend	0.45018	3.6146	0.702775	1.10955	HI.4803.001.N705---N508.B1_P35	Charron, Marsit et al. Nat Comm 2019
B7	BA1	Tini	0.45018	3.67277	1.02464	0.902351	HI.4802.002.N703---N504.B7_P1	Charron, Marsit et al. Nat Comm 2019
B7	BA1	Tend	0.45018	3.4617	0.682507	1.21563	HI.4803.003.N703---N506.B7_P35	Charron, Marsit et al. Nat Comm 2019
B10	BA1	Tini	0.45018	3.44659	0.687068	1.27203	HI.4802.003.N702---N504.B10_P1	Charron, Marsit et al. Nat Comm 2019
B10	BA1	Tend	0.45018	3.56847	0.738394	1.111	HI.4803.001.N705---N502.B10_P35	Charron, Marsit et al. Nat Comm 2019
B15	BA1	Tini	0.45018	3.6197	0.790485	1.2328	HI.4802.001.N701---N508.B15_P1	Charron, Marsit et al. Nat Comm 2019
B15	BA1	Tend	0.45018	3.85033	1.27059	0.982312	HI.4803.003.N708---N505.B15_P35	Charron, Marsit et al. Nat Comm 2019
B18	BA1	Tini	0.45018	3.40748	0.632771	1.31301	HI.4802.003.N702---N507.B18_P1	Charron, Marsit et al. Nat Comm 2019
B18	BA1	Tend	0.45018	3.5325	0.658512	1.2149	HI.4803.003.N708---N506.B18_P35	Charron, Marsit et al. Nat Comm 2019
B19	BA1	Tini	0.45018	3.39705	0.579532	1.28764	HI.4802.001.N709---N504.B19_P1	Charron, Marsit et al. Nat Comm 2019
B19	BA1	Tend	0.45018	3.25161	0.6369	1.22186	HI.4803.003.N709---N505.B19_P35	Charron, Marsit et al. Nat Comm 2019
B23	BA1	Tini	0.45018	3.58186	0.535616	1.12734	HI.4802.003.N712---N502.B23_P1	Charron, Marsit et al. Nat Comm 2019
B23	BA1	Tend	0.45018	3.43034	0.607438	1.21543	HI.4803.003.N704---N504.B23_P35	Charron, Marsit et al. Nat Comm 2019
B28	BA1	Tini	0.45018	3.52638	0.757106	1.25861	HI.4802.002.N703---N502.B28_P1	Charron, Marsit et al. Nat Comm 2019
B28	BA1	Tend	0.45018	3.53328	1.39834	1.04798	HI.4803.001.N701---N508.B28_P35	Charron, Marsit et al. Nat Comm 2019
B29	BA1	Tini	0.45018	3.51866	0.879702	1.10558	HI.4802.001.N709---N505.B29_P1	Charron, Marsit et al. Nat Comm 2019
B29	BA1	Tend	0.45018	3.38631	0.610869	1.1563	HI.4803.003.N702---N517.B29_P35	Charron, Marsit et al. Nat Comm 2019
B30	BA1	Tini	0.45018	3.59253	0.77468	1.16046	HI.4802.001.N708---N507.B30_P1	Charron, Marsit et al. Nat Comm 2019
B30	BA1	Tend	0.45018	3.58146	0.726607	1.18229	HI.4803.001.N707---N503.B30_P35	Charron, Marsit et al. Nat Comm 2019
B31	BA1	Tini	0.45018	3.64316	0.762357	1.15984	HI.4802.001.N712---N503.B31_P1	Charron, Marsit et al. Nat Comm 2019
B31	BA1	Tend	0.45018	3.41095	0.697922	1.2015	HI.4803.003.N701---N505.B31_P35	Charron, Marsit et al. Nat Comm 2019
B33	BA1	Tini	0.45018	3.56542	0.782242	1.22732	HI.4802.001.N703---N517.B33_P1	Charron, Marsit et al. Nat Comm 2019
B33	BA1	Tend	0.45018	3.66542	0.623004	1.46062	HI.4803.003.N705---N502.B33_P35	Charron, Marsit et al. Nat Comm 2019
B37	BA1	Tini	0.45018	3.63073	0.653123	1.14451	HI.4802.002.N710---N507.B37_P1	Charron, Marsit et al. Nat Comm 2019
B37	BA1	Tend	0.45018	3.49804	0.725447	1.29143	HI.4803.003.N709---N503.B37_P35	Charron, Marsit et al. Nat Comm 2019
B46	BA1	Tini	0.45018	3.42386	0.728713	1.22948	HI.4802.002.N706---N508.B46_P1	Charron, Marsit et al. Nat Comm 2019
B46	BA1	Tend	0.45018	3.46829	0.63438	1.58777	HI.4803.003.N708---N507.B46_P35	Charron, Marsit et al. Nat Comm 2019
B47	BA1	Tini	0.45018	3.39462	0.613426	1.24891	HI.4802.002.N706---N505.B47_P1	Charron, Marsit et al. Nat Comm 2019
B47	BA1	Tend	0.45018	3.52855	0.714963	1.22516	HI.4803.002.N709---N506.B47_P35	Charron, Marsit et al. Nat Comm 2019
B54	BA1	Tini	0.45018	3.59772	0.78832	0.821379	HI.4802.001.N707---N507.B54_P1	Charron, Marsit et al. Nat Comm 2019
B54	BA1	Tend	0.45018	3.48762	0.680261	0.821124	HI.4803.003.N703---N505.B54_P35	Charron, Marsit et al. Nat Comm 2019
B61	BA1	Tini	0.45018	3.58404	0.75875	1.20177	HI.4802.001.N707---N504.B61_P1	Charron, Marsit et al. Nat Comm 2019
B61	BA1	Tend	0.45018	3.48769	0.68282	1.2026	HI.4803.002.N708---N507.B61_P35	Charron, Marsit et al. Nat Comm 2019
B64	BA1	Tini	0.45018	3.64376	0.762197	1.19489	HI.4802.001.N703---N508.B64_P1	Charron, Marsit et al. Nat Comm 2019
B64	BA1	Tend	0.45018	3.56408	0.66286	1.12999	HI.4803.002.N708---N504.B64_P35	Charron, Marsit et al. Nat Comm 2019
B67	BA1	Tini	0.45018	3.56642	0.837217	1.20301	HI.4802.001.N702---N517.B67_P1	Charron, Marsit et al. Nat Comm 2019
B67	BA1	Tend	0.45018	3.65848	0.680813	1.06881	HI.4803.001.N705---N507.B67_P35	Charron, Marsit et al. Nat Comm 2019
B69	BA1	Tini	0.45018	3.61073	0.696891	1.12752	HI.4802.001.N705---N506.B69_P1	Charron, Marsit et al. Nat Comm 2019
B69	BA1	Tend	0.45018	3.56674	0.676197	1.29463	HI.4803.003.N702---N503.B69_P35	Charron, Marsit et al. Nat Comm 2019
B70	BA1	Tini	0.45018	3.59197	0.770052	1.16124	HI.4802.001.N712---N504.B70_P1	Charron, Marsit et al. Nat Comm 2019
B70	BA1	Tend	0.45018	3.38513	0.648169	1.24832	HI.4803.002.N702---N502.B70_P35	Charron, Marsit et al. Nat Comm 2019
B71	BA1	Tini	0.45018	3.46437	0.633613	1.25293	HI.4802.003.N703---N517.B71_P1	Charron, Marsit et al. Nat Comm 2019
B71	BA1	Tend	0.45018	3.55356	0.680617	1.33117	HI.4803.002.N704---N506.B71_P35	Charron, Marsit et al. Nat Comm 2019
B72	BA1	Tini	0.45018	3.49176	0.713178	1.27051	HI.4802.002.N702---N507.B72_P1	Charron, Marsit et al. Nat Comm 2019
B72	BA1	Tend	0.45018	3.66636	0.743267	1.10408	HI.4803.001.N708---N502.B72_P35	Charron, Marsit et al. Nat Comm 2019
B74	BA1	Tini	0.45018	3.26859	0.66941	1.11972	HI.4802.003.N710---N517.B74_P1	Charron, Marsit et al. Nat Comm 2019
B74	BA1	Tend	0.45018	3.60961	0.765961	0.651249	HI.4803.001.N702---N502.B74_P35	Charron, Marsit et al. Nat Comm 2019
B80	BA1	Tini	0.45018	3.5988	0.779281	1.19432	HI.4802.001.N710---N507.B80_P1	Charron, Marsit et al. Nat Comm 2019
B80	BA1	Tend	0.45018	3.45451	0.626343	1.11874	HI.4803.002.N712---N507.B80_P35	Charron, Marsit et al. Nat Comm 2019
B82	BA1	Tini	0.45018	3.46343	0.68533	1.20109	HI.4802.003.N709---N504.B82_P1	Charron, Marsit et al. Nat Comm 2019
B82	BA1	Tend	0.45018	3.47227	0.71211	1.58369	HI.4803.003.N705---N503.B82_P35	Charron, Marsit et al. Nat Comm 2019
B85	BA1	Tini	0.45018	3.43212	0.61174	1.26382	HI.4802.003.N709---N502.B85_P1	Charron, Marsit et al. Nat Comm 2019
B85	BA1	Tend	0.45018	3.61656	0.631672	1.24758	HI.4803.002.N701---N503.B85_P35	Charron, Marsit et al. Nat Comm 2019
B86	BA1	Tini	0.45018	3.62863	0.756165	1.16014	HI.4802.002.N701---N505.B86_P1	Charron, Marsit et al. Nat Comm 2019
B86	BA1	Tend	0.45018	3.41398	0.62908	1.27761	HI.4803.003.N706---N517.B86_P35	Charron, Marsit et al. Nat Comm 2019
B90	BA1	Tini	0.45018	3.6614	0.860982	1.12581	HI.4802.001.N706---N508.B90_P1	Charron, Marsit et al. Nat Comm 2019
B90	BA1	Tend	0.45018	3.28445	0.465622	1.63455	HI.4803.003.N706---N502.B90_P35	Charron, Marsit et al. Nat Comm 2019
B96	BA1	Tini	0.45018	3.52997	1.02532	1.17145	HI.4802.001.N701---N507.B96_P1	Charron, Marsit et al. Nat Comm 2019
B96	BA1	Tend	0.45018	3.50335	0.523786	1.31038	HI.4803.002.N701---N507.B96_P35	Charron, Marsit et al. Nat Comm 2019
E3	BA2	Tini	0.449584	2.95216	-0.837602		HI.4802.003.N710---N502.E3_P1	Charron, Marsit et al. Nat Comm 2019
E3	BA2	Tend	0.449584	3.04372	-0.937987		HI.4803.001.N711---N504.E3_P35	Charron, Marsit et al. Nat Comm 2019
E9	BA2	Tini	0.449584	3.00183	-0.796124		HI.4802.001.N708---N502.E9_P1	Charron, Marsit et al. Nat Comm 2019
E9	BA2	Tend	0.449584	3.11795	-0.783588		HI.4802.003.N712---N507.E9_P35	Charron, Marsit et al. Nat Comm 2019
E11	BA2	Tini	0.449584	3.04143	-0.901773		HI.4802.001.N705---N503.E11_P1	Charron, Marsit et al. Nat Comm 2019
E11	BA2	Tend	0.449584	3.19896	-0.697532		HI.4803.001.N706---N503.E11_P35	Charron, Marsit et al. Nat Comm 2019
E12	BA2	Tini	0.449584	2.9871	-0.961915		HI.4802.001.N709---N502.E12_P1	Charron, Marsit et al. Nat Comm 2019
E12	BA2	Tend	0.449584	3.13421	-0.803874		HI.4803.003.N711---N503.E12_P35	Charron, Marsit et al. Nat Comm 2019
E15	BA2	Tini	0.449584	3.05293	-0.795513		HI.4802.001.N706---N502.E15_P1	Charron, Marsit et al. Nat Comm 2019
E15	BA2	Tend	0.449584	2.88595	-1.02246		HI.4803.002.N703---N517.E15_P35	Charron, Marsit et al. Nat Comm 2019
E21	BA2	Tini	0.449584	2.97029	-0.923722		HI.4802.003.N706---N505.E21_P1	Charron, Marsit et al. Nat Comm 2019
E21	BA2	Tend	0.449584	2.90872	-0.854368		HI.4802.003.N712---N504.E21_P35	Charron, Marsit et al. Nat Comm 2019
E23	BA2	Tini	0.449584	2.94649	-0.853976		HI.4802.003.N701---N507.E23_P1	Charron, Marsit et al. Nat Comm 2019
E23	BA2	Tend	0.449584	3.31727	-0.25925		HI.4803.001.N712---N504.E23_P35	Charron, Marsit et al. Nat Comm 2019
E25	BA2	Tini	0.449584	2.90612	-1.0175		HI.4802.001.N709---N507.E25_P1	Charron, Marsit et al. Nat Comm 2019
E25	BA2	Tend	0.449584	2.95432	-0.969763		HI.4803.002.N706---N506.E25_P35	Charron, Marsit et al. Nat Comm 2019
E27	BA2	Tini	0.449584	3.17796	-0.652003		NS.1249.001.N707---N506.E27_P1	Charron, Marsit et al. Nat Comm 2019
E27	BA2	Tend	0.449584	3.39889	-0.482318		NS.1250.002.N706---N508.E27_P35	Charron, Marsit et al. Nat Comm 2019
E30	BA2	Tini	0.449584	3.00852	-0.832461		HI.4802.003.N707---N508.E30_P1	Charron, Marsit et al. Nat Comm 2019
E30	BA2	Tend	0.449584	3.25856	-0.933956		HI.4803.003.N703---N504.E30_P35	Charron, Marsit et al. Nat Comm 2019
E33	BA2	Tini	0.449584	3.05532	-0.655911		HI.4802.001.N710---N517.E33_P1	Charron, Marsit et al. Nat Comm 2019
E33	BA2	Tend	0.449584	3.10638	-0.856452		HI.4803.001.N712---N507.E33_P35	Charron, Marsit et al. Nat Comm 2019
E34	BA2	Tini	0.449584	2.82996	-0.858292		HI.4802.001.N711---N504.E34_P1	Charron, Marsit et al. Nat Comm 2019
E34	BA2	Tend	0.449584	3.07334	-0.715715		HI.4803.001.N705---N505.E34_P35	Charron, Marsit et al. Nat Comm 2019
E36	BA2	Tini	0.449584	2.98536	-0.835232		HI.4802.002.N709---N505.E36_P1	Charron, Marsit et al. Nat Comm 2019
E36	BA2	Tend	0.449584	2.99934	-0.669942		HI.4803.001.N710---N505.E36_P35	Charron, Marsit et al. Nat Comm 2019
E37	BA2	Tini	0.449584	2.87893	-1.01184		HI.4802.003.N705---N505.E37_P1	Charron, Marsit et al. Nat Comm 2019
E37	BA2	Tend	0.449584	3.06783	-0.974767		HI.4803.002.N707---N508.E37_P35	Charron, Marsit et al. Nat Comm 2019
E39	BA2	Tini	0.449584	3.00986	-0.972693		HI.4802.002.N710---N508.E39_P1	Charron, Marsit et al. Nat Comm 2019
E39	BA2	Tend	0.449584	2.93077	-1.04336		HI.4803.002.N703---N506.E39_P35	Charron, Marsit et al. Nat Comm 2019
E40	BA2	Tini	0.449584	3.12993	-0.623951		HI.4802.001.N708---N505.E40_P1	Charron, Marsit et al. Nat Comm 2019
E40	BA2	Tend	0.449584	2.97392	-0.683538		HI.4803.001.N711---N503.E40_P35	Charron, Marsit et al. Nat Comm 2019
E50	BA2	Tini	0.449584	3.01733	-0.809592		HI.4802.002.N704---N517.E50_P1	Charron, Marsit et al. Nat Comm 2019
E50	BA2	Tend	0.449584	2.93618	-0.900923		HI.4803.002.N706---N504.E50_P35	Charron, Marsit et al. Nat Comm 2019
E51	BA2	Tini	0.449584	2.95537	-0.723922		HI.4802.001.N709---N503.E51_P1	Charron, Marsit et al. Nat Comm 2019
E51	BA2	Tend	0.449584	2.97868	-0.837686		HI.4803.003.N701---N507.E51_P35	Charron, Marsit et al. Nat Comm 2019
E52	BA2	Tini	0.449584	3.13702	-0.821755		HI.4802.001.N704---N517.E52_P1	Charron, Marsit et al. Nat Comm 2019
E52	BA2	Tend	0.449584	3.31573	-0.845258		HI.4803.002.N708---N517.E52_P35	Charron, Marsit et al. Nat Comm 2019
E54	BA2	Tini	0.449584	2.99462	-0.722101		HI.4802.002.N711---N504.E54_P1	Charron, Marsit et al. Nat Comm 2019
E54	BA2	Tend	0.449584	3.13263	-0.846732		HI.4803.002.N702---N504.E54_P35	Charron, Marsit et al. Nat Comm 2019
E61	BA2	Tini	0.449584	2.97355	-0.865044		HI.4802.003.N707---N502.E61_P1	Charron, Marsit et al. Nat Comm 2019
E61	BA2	Tend	0.449584	3.05494	-0.809094		HI.4803.002.N710---N507.E61_P35	Charron, Marsit et al. Nat Comm 2019
E64	BA2	Tini	0.449584	2.9412	-0.901872		HI.4802.003.N706---N502.E64_P1	Charron, Marsit et al. Nat Comm 2019
E64	BA2	Tend	0.449584	3.15306	-0.995336		HI.4803.001.N709---N517.E64_P35	Charron, Marsit et al. Nat Comm 2019
E65	BA2	Tini	0.449584	2.82361	-0.80972		HI.4802.003.N711---N505.E65_P1	Charron, Marsit et al. Nat Comm 2019
E65	BA2	Tend	0.449584	3.05433	-0.87978		HI.4803.003.N704---N505.E65_P35	Charron, Marsit et al. Nat Comm 2019
E68	BA2	Tini	0.449584	2.82319	-1.11118		HI.4802.003.N708---N506.E68_P1	Charron, Marsit et al. Nat Comm 2019
E68	BA2	Tend	0.449584	3.13248	-0.72351		HI.4803.001.N702---N504.E68_P35	Charron, Marsit et al. Nat Comm 2019
E69	BA2	Tini	0.449584	3.01019	-0.876888		HI.4802.003.N712---N517.E69_P1	Charron, Marsit et al. Nat Comm 2019
E69	BA2	Tend	0.449584	2.92539	-0.814851		HI.4803.002.N709---N504.E69_P35	Charron, Marsit et al. Nat Comm 2019
E70	BA2	Tini	0.449584	3.05408	-0.649796		HI.4802.002.N710---N505.E70_P1	Charron, Marsit et al. Nat Comm 2019
E70	BA2	Tend	0.449584	3.09607	-0.699111		HI.4803.001.N702---N503.E70_P35	Charron, Marsit et al. Nat Comm 2019
E72	BA2	Tini	0.449584	2.9999	-0.975912		HI.4802.003.N711---N502.E72_P1	Charron, Marsit et al. Nat Comm 2019
E72	BA2	Tend	0.449584	3.06614	-0.884724		HI.4803.001.N709---N508.E72_P35	Charron, Marsit et al. Nat Comm 2019
E78	BA2	Tini	0.449584	3.00375	-0.875131		HI.4802.002.N710---N504.E78_P1	Charron, Marsit et al. Nat Comm 2019
E78	BA2	Tend	0.449584	3.05586	-0.959425		HI.4803.002.N707---N504.E78_P35	Charron, Marsit et al. Nat Comm 2019
E81	BA2	Tini	0.449584	2.89267	-0.807773		HI.4802.002.N706---N502.E81_P1	Charron, Marsit et al. Nat Comm 2019
E81	BA2	Tend	0.449584	3.07711	-0.763509		HI.4803.001.N702---N517.E81_P35	Charron, Marsit et al. Nat Comm 2019
E84	BA2	Tini	0.449584	3.13066	-0.618874		HI.4802.001.N702---N506.E84_P1	Charron, Marsit et al. Nat Comm 2019
E84	BA2	Tend	0.449584	3.1274	-0.848116		HI.4803.002.N707---N503.E84_P35	Charron, Marsit et al. Nat Comm 2019
E88	BA2	Tini	0.449584	3.06346	-0.579859		HI.4802.001.N704---N505.E88_P1	Charron, Marsit et al. Nat Comm 2019
E88	BA2	Tend	0.449584	2.98251	-0.742138		HI.4803.002.N708---N506.E88_P35	Charron, Marsit et al. Nat Comm 2019
E89	BA2	Tini	0.449584	3.07902	-0.869994		HI.4802.001.N705---N517.E89_P1	Charron, Marsit et al. Nat Comm 2019
E89	BA2	Tend	0.449584	2.97387	-0.765099		HI.4803.001.N712---N508.E89_P35	Charron, Marsit et al. Nat Comm 2019
E92	BA2	Tini	0.449584	2.38911	-1.50291		HI.4802.003.N702---N508.E92_P1	Charron, Marsit et al. Nat Comm 2019
E92	BA2	Tend	0.449584	3.13668	-0.653983		HI.4803.001.N706---N502.E92_P35	Charron, Marsit et al. Nat Comm 2019
E93	BA2	Tini	0.449584	2.88701	-0.960643		HI.4802.001.N712---N502.E93_P1	Charron, Marsit et al. Nat Comm 2019
E93	BA2	Tend	0.449584	3.08742	-0.574362		HI.4803.001.N712---N506.E93_P35	Charron, Marsit et al. Nat Comm 2019
C1	BSc1	Tini	2.09721	2.0287	0.418648	1.36712	NS.1249.002.N702---N504.C1_P1	Charron, Marsit et al. Nat Comm 2019
C1	BSc1	Tend	2.09721	2.06064	0.447662	1.41186	NS.1250.002.N710---N504.C1_P35	Charron, Marsit et al. Nat Comm 2019
C2	BSc1	Tini	2.09721	2.17463	0.514008	1.28606	NS.1249.002.N704---N508.C2_P1	Charron, Marsit et al. Nat Comm 2019
C2	BSc1	Tend	2.09721	2.18328	0.613817	1.34522	NS.1250.001.N702---N517.C2_P35	Charron, Marsit et al. Nat Comm 2019
C3	BSc1	Tini	2.09721	2.0237	0.407032	1.32669	HI.4802.002.N706---N506.C3_P1	Charron, Marsit et al. Nat Comm 2019
C3	BSc1	Tend	2.09721	2.43685	0.362015	1.37531	HI.4803.001.N711---N507.C3_P35	Charron, Marsit et al. Nat Comm 2019
C5	BSc1	Tini	2.09721	1.98626	0.35678	1.45796	HI.4802.003.N704---N508.C5_P1	Charron, Marsit et al. Nat Comm 2019
C5	BSc1	Tend	2.09721	1.47072	0.427463	1.33686	HI.4803.001.N708---N517.C5_P35	Charron, Marsit et al. Nat Comm 2019
C12	BSc1	Tini	2.09721	2.02868	0.395394	1.39012	HI.4802.002.N708---N505.C12_P1	Charron, Marsit et al. Nat Comm 2019
C12	BSc1	Tend	2.09721	2.21024	-0.206654	1.21024	HI.4803.001.N712---N505.C12_P35	Charron, Marsit et al. Nat Comm 2019
C13	BSc1	Tini	2.09721	1.89372	0.281423	1.51559	HI.4802.003.N705---N506.C13_P1	Charron, Marsit et al. Nat Comm 2019
C13	BSc1	Tend	2.09721	2.19113	0.254116	1.46604	HI.4803.003.N710---N502.C13_P35	Charron, Marsit et al. Nat Comm 2019
C14	BSc1	Tini	2.09721	1.97868	0.310755	1.53507	HI.4802.003.N706---N517.C14_P1	Charron, Marsit et al. Nat Comm 2019
C14	BSc1	Tend	2.09721	1.94957	0.293788	1.44851	HI.4803.003.N701---N517.C14_P35	Charron, Marsit et al. Nat Comm 2019
C15	BSc1	Tini	2.09721	2.11519	0.489006	1.337	HI.4802.001.N711---N508.C15_P1	Charron, Marsit et al. Nat Comm 2019
C15	BSc1	Tend	2.09721	2.47131	0.323558	1.20572	HI.4803.001.N702---N506.C15_P35	Charron, Marsit et al. Nat Comm 2019
C20	BSc1	Tini	2.09721	2.02187	0.436905	1.43002	HI.4802.002.N711---N507.C20_P1	Charron, Marsit et al. Nat Comm 2019
C20	BSc1	Tend	2.09721	1.95556	0.286938	1.58717	HI.4803.003.N705---N508.C20_P35	Charron, Marsit et al. Nat Comm 2019
C21	BSc1	Tini	2.09721	2.07226	0.378118	1.40508	HI.4802.001.N701---N504.C21_P1	Charron, Marsit et al. Nat Comm 2019
C21	BSc1	Tend	2.09721	2.03946	0.257741	1.68997	HI.4803.002.N705---N517.C21_P35	Charron, Marsit et al. Nat Comm 2019
C23	BSc1	Tini	2.09721	2.01485	0.523603	1.50993	HI.4802.003.N711---N504.C23_P1	Charron, Marsit et al. Nat Comm 2019
C23	BSc1	Tend	2.09721	2.22584	0.388273	1.34074	HI.4803.001.N710---N504.C23_P35	Charron, Marsit et al. Nat Comm 2019
C25	BSc1	Tini	2.09721	1.91698	0.353082	1.54964	HI.4802.003.N701---N505.C25_P1	Charron, Marsit et al. Nat Comm 2019
C25	BSc1	Tend	2.09721	1.77628	0.237126	1.60345	HI.4802.003.N712---N505.C25_P35	Charron, Marsit et al. Nat Comm 2019
C26	BSc1	Tini	2.09721	2.06657	0.490174	1.3885	HI.4802.001.N711---N507.C26_P1	Charron, Marsit et al. Nat Comm 2019
C26	BSc1	Tend	2.09721	1.94648	0.36905	1.49833	HI.4803.002.N710---N504.C26_P35	Charron, Marsit et al. Nat Comm 2019
C31	BSc1	Tini	2.09721	1.98271	0.428367	1.45091	HI.4802.002.N703---N507.C31_P1	Charron, Marsit et al. Nat Comm 2019
C31	BSc1	Tend	2.09721	2.06136	0.40816	1.46261	HI.4803.001.N706---N507.C31_P35	Charron, Marsit et al. Nat Comm 2019
C32	BSc1	Tini	2.09721	1.89795	0.299567	1.52388	HI.4802.003.N705---N504.C32_P1	Charron, Marsit et al. Nat Comm 2019
C32	BSc1	Tend	2.09721	2.04892	0.275847	1.59777	HI.4803.002.N703---N505.C32_P35	Charron, Marsit et al. Nat Comm 2019
C37	BSc1	Tini	2.09721	2.06106	0.417199	1.41189	HI.4802.001.N708---N517.C37_P1	Charron, Marsit et al. Nat Comm 2019
C37	BSc1	Tend	2.09721	2.17386	0.343214	1.50704	HI.4803.002.N704---N504.C37_P35	Charron, Marsit et al. Nat Comm 2019
C44	BSc1	Tini	2.09721	1.95047	0.38696	1.52881	HI.4802.003.N701---N508.C44_P1	Charron, Marsit et al. Nat Comm 2019
C44	BSc1	Tend	2.09721	2.07139	0.37805	1.38316	HI.4803.001.N705---N503.C44_P35	Charron, Marsit et al. Nat Comm 2019
C46	BSc1	Tini	2.09721	1.99814	0.439557	1.50096	HI.4802.002.N707---N502.C46_P1	Charron, Marsit et al. Nat Comm 2019
C46	BSc1	Tend	2.09721	2.01962	0.315221	1.43268	HI.4803.003.N711---N505.C46_P35	Charron, Marsit et al. Nat Comm 2019
C49	BSc1	Tini	2.09721	1.95048	0.471208	1.41768	HI.4802.002.N705---N505.C49_P1	Charron, Marsit et al. Nat Comm 2019
C49	BSc1	Tend	2.09721	2.27852	0.299163	1.23205	HI.4803.001.N703---N504.C49_P35	Charron, Marsit et al. Nat Comm 2019
C57	BSc1	Tini	2.09721	1.89045	0.313393	1.51194	HI.4802.002.N710---N517.C57_P1	Charron, Marsit et al. Nat Comm 2019
C57	BSc1	Tend	2.09721	2.03145	0.451305	1.3773	HI.4803.001.N707---N517.C57_P35	Charron, Marsit et al. Nat Comm 2019
C59	BSc1	Tini	2.09721	2.01402	0.469021	1.43714	HI.4802.001.N708---N503.C59_P1	Charron, Marsit et al. Nat Comm 2019
C59	BSc1	Tend	2.09721	2.49805	0.312831	1.42679	HI.4803.003.N702---N504.C59_P35	Charron, Marsit et al. Nat Comm 2019
C62	BSc1	Tini	2.09721	1.9933	0.465564	1.45349	HI.4802.003.N709---N517.C62_P1	Charron, Marsit et al. Nat Comm 2019
C62	BSc1	Tend	2.09721	1.87965	0.363952	1.5137	HI.4803.002.N711---N517.C62_P35	Charron, Marsit et al. Nat Comm 2019
C65	BSc1	Tini	2.09721	2.01034	0.472122	1.38152	HI.4802.002.N704---N502.C65_P1	Charron, Marsit et al. Nat Comm 2019
C65	BSc1	Tend	2.09721	1.8373	0.256488	1.49654	HI.4803.003.N702---N508.C65_P35	Charron, Marsit et al. Nat Comm 2019
C68	BSc1	Tini	2.09721	1.82248	0.442723	1.43462	HI.4802.001.N701---N502.C68_P1	Charron, Marsit et al. Nat Comm 2019
C68	BSc1	Tend	2.09721	1.7668	0.427317	1.49911	HI.4803.002.N709---N502.C68_P35	Charron, Marsit et al. Nat Comm 2019
C70	BSc1	Tini	2.09721	1.99318	0.307693	1.46267	HI.4802.003.N708---N507.C70_P1	Charron, Marsit et al. Nat Comm 2019
C70	BSc1	Tend	2.09721	1.96096	0.277692	1.56025	HI.4803.002.N712---N517.C70_P35	Charron, Marsit et al. Nat Comm 2019
C71	BSc1	Tini	2.09721	1.88976	0.297496	1.53963	HI.4802.001.N706---N517.C71_P1	Charron, Marsit et al. Nat Comm 2019
C71	BSc1	Tend	2.09721	1.97024	0.303403	1.61476	HI.4803.002.N706---N502.C71_P35	Charron, Marsit et al. Nat Comm 2019
C72	BSc1	Tini	2.09721	1.95872	0.400727	1.42063	HI.4802.002.N707---N504.C72_P1	Charron, Marsit et al. Nat Comm 2019
C72	BSc1	Tend	2.09721	1.86126	0.360934	1.46785	HI.4802.003.N712---N506.C72_P35	Charron, Marsit et al. Nat Comm 2019
C73	BSc1	Tini	2.09721	1.92353	0.165863	1.53859	HI.4802.003.N710---N508.C73_P1	Charron, Marsit et al. Nat Comm 2019
C73	BSc1	Tend	2.09721	2.00603	0.397985	1.32031	HI.4803.001.N711---N517.C73_P35	Charron, Marsit et al. Nat Comm 2019
C74	BSc1	Tini	2.09721	2.00542	0.363677	1.49705	HI.4802.003.N708---N503.C74_P1	Charron, Marsit et al. Nat Comm 2019
C74	BSc1	Tend	2.09721	2.04329	0.368135	1.53288	HI.4803.002.N711---N503.C74_P35	Charron, Marsit et al. Nat Comm 2019
C77	BSc1	Tini	2.09721	2.06911	0.354862	1.48414	HI.4802.001.N706---N504.C77_P1	Charron, Marsit et al. Nat Comm 2019
C77	BSc1	Tend	2.09721	1.19918	0.292288	1.63806	HI.4803.002.N711---N504.C77_P35	Charron, Marsit et al. Nat Comm 2019
C78	BSc1	Tini	2.09721	2.0084	0.39042	1.4004	HI.4802.002.N701---N506.C78_P1	Charron, Marsit et al. Nat Comm 2019
C78	BSc1	Tend	2.09721	2.26829	0.402141	1.45151	HI.4803.003.N706---N508.C78_P35	Charron, Marsit et al. Nat Comm 2019
C82	BSc1	Tini	2.09721	2.02102	0.4306	1.47101	HI.4802.001.N702---N508.C82_P1	Charron, Marsit et al. Nat Comm 2019
C82	BSc1	Tend	2.09721	1.39241	0.318826	1.04231	HI.4803.003.N710---N506.C82_P35	Charron, Marsit et al. Nat Comm 2019
C83	BSc1	Tini	2.09721	2.00418	0.385946	1.37145	HI.4802.002.N710---N506.C83_P1	Charron, Marsit et al. Nat Comm 2019
C83	BSc1	Tend	2.09721	2.03829	0.301329	1.49286	HI.4803.002.N708---N502.C83_P35	Charron, Marsit et al. Nat Comm 2019
C84	BSc1	Tini	2.09721	1.87771	0.390327	1.55007	HI.4802.003.N711---N507.C84_P1	Charron, Marsit et al. Nat Comm 2019
C84	BSc1	Tend	2.09721	1.97458	0.917997	1.3258	HI.4803.001.N705---N517.C84_P35	Charron, Marsit et al. Nat Comm 2019
C87	BSc1	Tini	2.09721	1.98288	0.516968	1.56612	HI.4802.001.N703---N503.C87_P1	Charron, Marsit et al. Nat Comm 2019
C87	BSc1	Tend	2.09721	1.94634	0.380174	1.48809	HI.4803.003.N707---N502.C87_P35	Charron, Marsit et al. Nat Comm 2019
C96	BSc1	Tini	2.09721	1.96224	0.31555	1.41824	HI.4802.003.N710---N507.C96_P1	Charron, Marsit et al. Nat Comm 2019
C96	BSc1	Tend	2.09721	2.11914	0.392154	1.51526	HI.4803.002.N707---N507.C96_P35	Charron, Marsit et al. Nat Comm 2019
F1	BSc2	Tini	2.09483	1.37362			HI.4802.001.N712---N506.F1_P1	Charron, Marsit et al. Nat Comm 2019
F1	BSc2	Tend	2.09483	1.74027			HI.4803.002.N709---N507.F1_P35	Charron, Marsit et al. Nat Comm 2019
F2	BSc2	Tini	2.09483	1.67928			NS.1249.001.N705---N503.F2_P1	Charron, Marsit et al. Nat Comm 2019
F2	BSc2	Tend	2.09483	1.06699			NS.1250.002.N711---N507.F2_P35	Charron, Marsit et al. Nat Comm 2019
F3	BSc2	Tini	2.09483	1.25376			HI.4802.002.N702---N508.F3_P1	Charron, Marsit et al. Nat Comm 2019
F3	BSc2	Tend	2.09483	1.30527			HI.4803.003.N705---N505.F3_P35	Charron, Marsit et al. Nat Comm 2019
F4	BSc2	Tini	2.09483	1.47555			HI.4802.001.N707---N505.F4_P1	Charron, Marsit et al. Nat Comm 2019
F4	BSc2	Tend	2.09483	1.32996			HI.4803.001.N702---N505.F4_P35	Charron, Marsit et al. Nat Comm 2019
F7	BSc2	Tini	2.09483	1.48788			HI.4802.001.N706---N506.F7_P1	Charron, Marsit et al. Nat Comm 2019
F7	BSc2	Tend	2.09483	1.74644			HI.4803.001.N704---N508.F7_P35	Charron, Marsit et al. Nat Comm 2019
F8	BSc2	Tini	2.09483	1.33415			HI.4802.002.N705---N508.F8_P1	Charron, Marsit et al. Nat Comm 2019
F8	BSc2	Tend	2.09483	1.21584			HI.4803.002.N703---N503.F8_P35	Charron, Marsit et al. Nat Comm 2019
F11	BSc2	Tini	2.09483	1.34054			HI.4802.002.N709---N502.F11_P1	Charron, Marsit et al. Nat Comm 2019
F11	BSc2	Tend	2.09483	1.10319			HI.4803.002.N701---N506.F11_P35	Charron, Marsit et al. Nat Comm 2019
F12	BSc2	Tini	2.09483	1.0859			HI.4802.002.N704---N506.F12_P1	Charron, Marsit et al. Nat Comm 2019
F12	BSc2	Tend	2.09483	1.27139			HI.4803.003.N708---N517.F12_P35	Charron, Marsit et al. Nat Comm 2019
F13	BSc2	Tini	2.09483	1.20958			HI.4802.003.N704---N507.F13_P1	Charron, Marsit et al. Nat Comm 2019
F13	BSc2	Tend	2.09483	1.26087			HI.4803.003.N702---N505.F13_P35	Charron, Marsit et al. Nat Comm 2019
F15	BSc2	Tini	2.09483	1.43876			HI.4802.001.N707---N508.F15_P1	Charron, Marsit et al. Nat Comm 2019
F15	BSc2	Tend	2.09483	1.37396			HI.4803.001.N710---N503.F15_P35	Charron, Marsit et al. Nat Comm 2019
F20	BSc2	Tini	2.09483	1.29654			HI.4802.002.N711---N506.F20_P1	Charron, Marsit et al. Nat Comm 2019
F20	BSc2	Tend	2.09483	1.06314			HI.4803.003.N701---N504.F20_P35	Charron, Marsit et al. Nat Comm 2019
F21	BSc2	Tini	2.09483	1.32492			HI.4802.001.N702---N502.F21_P1	Charron, Marsit et al. Nat Comm 2019
F21	BSc2	Tend	2.09483	1.25901			HI.4803.003.N705---N517.F21_P35	Charron, Marsit et al. Nat Comm 2019
F23	BSc2	Tini	2.09483	1.33862			HI.4802.001.N706---N503.F23_P1	Charron, Marsit et al. Nat Comm 2019
F23	BSc2	Tend	2.09483	1.18115			HI.4803.002.N708---N508.F23_P35	Charron, Marsit et al. Nat Comm 2019
F25	BSc2	Tini	2.09483	1.24455			HI.4802.003.N704---N502.F25_P1	Charron, Marsit et al. Nat Comm 2019
F25	BSc2	Tend	2.09483	1.25689			HI.4803.002.N701---N508.F25_P35	Charron, Marsit et al. Nat Comm 2019
F27	BSc2	Tini	2.09483	1.47386			HI.4802.002.N708---N503.F27_P1	Charron, Marsit et al. Nat Comm 2019
F27	BSc2	Tend	2.09483	1.39795			HI.4803.001.N707---N504.F27_P35	Charron, Marsit et al. Nat Comm 2019
F31	BSc2	Tini	2.09483	1.24052			HI.4802.003.N706---N506.F31_P1	Charron, Marsit et al. Nat Comm 2019
F31	BSc2	Tend	2.09483	1.31283			HI.4803.003.N706---N503.F31_P35	Charron, Marsit et al. Nat Comm 2019
F34	BSc2	Tini	2.09483	1.35316			HI.4802.001.N707---N503.F34_P1	Charron, Marsit et al. Nat Comm 2019
F34	BSc2	Tend	2.09483	1.46207			HI.4803.002.N705---N508.F34_P35	Charron, Marsit et al. Nat Comm 2019
F39	BSc2	Tini	2.09483	1.22424			HI.4802.002.N703---N508.F39_P1	Charron, Marsit et al. Nat Comm 2019
F39	BSc2	Tend	2.09483	1.28676			HI.4803.002.N706---N505.F39_P35	Charron, Marsit et al. Nat Comm 2019
F48	BSc2	Tini	2.09483	1.32897			HI.4802.002.N712---N506.F48_P1	Charron, Marsit et al. Nat Comm 2019
F48	BSc2	Tend	2.09483	1.29114			HI.4803.002.N709---N508.F48_P35	Charron, Marsit et al. Nat Comm 2019
F49	BSc2	Tini	2.09483	1.26395			HI.4802.003.N705---N507.F49_P1	Charron, Marsit et al. Nat Comm 2019
F49	BSc2	Tend	2.09483	1.28291			HI.4803.002.N702---N508.F49_P35	Charron, Marsit et al. Nat Comm 2019
F50	BSc2	Tini	2.09483	1.32991			HI.4802.001.N702---N503.F50_P1	Charron, Marsit et al. Nat Comm 2019
F50	BSc2	Tend	2.09483	1.33511			HI.4803.001.N710---N517.F50_P35	Charron, Marsit et al. Nat Comm 2019
F52	BSc2	Tini	2.09483	1.27827			HI.4802.002.N710---N502.F52_P1	Charron, Marsit et al. Nat Comm 2019
F52	BSc2	Tend	2.09483	1.20081			HI.4803.003.N709---N508.F52_P35	Charron, Marsit et al. Nat Comm 2019
F53	BSc2	Tini	2.09483	1.34144			HI.4802.002.N708---N504.F53_P1	Charron, Marsit et al. Nat Comm 2019
F53	BSc2	Tend	2.09483	1.23144			HI.4803.002.N710---N508.F53_P35	Charron, Marsit et al. Nat Comm 2019
F56	BSc2	Tini	2.09483	1.28009			HI.4802.002.N706---N503.F56_P1	Charron, Marsit et al. Nat Comm 2019
F56	BSc2	Tend	2.09483	1.85865			HI.4803.003.N706---N506.F56_P35	Charron, Marsit et al. Nat Comm 2019
F58	BSc2	Tini	2.09483	1.33075			HI.4802.002.N709---N504.F58_P1	Charron, Marsit et al. Nat Comm 2019
F58	BSc2	Tend	2.09483	1.13065			HI.4803.002.N701---N505.F58_P35	Charron, Marsit et al. Nat Comm 2019
F59	BSc2	Tini	2.09483	1.36559			HI.4802.001.N711---N503.F59_P1	Charron, Marsit et al. Nat Comm 2019
F59	BSc2	Tend	2.09483	1.36099			HI.4803.002.N704---N507.F59_P35	Charron, Marsit et al. Nat Comm 2019
F62	BSc2	Tini	2.09483	1.35772			HI.4802.002.N709---N506.F62_P1	Charron, Marsit et al. Nat Comm 2019
F62	BSc2	Tend	2.09483	1.3808			HI.4803.001.N704---N506.F62_P35	Charron, Marsit et al. Nat Comm 2019
F65	BSc2	Tini	2.09483	1.32408			HI.4802.003.N701---N517.F65_P1	Charron, Marsit et al. Nat Comm 2019
F65	BSc2	Tend	2.09483	1.33562			HI.4803.001.N704---N517.F65_P35	Charron, Marsit et al. Nat Comm 2019
F72	BSc2	Tini	2.09483	1.31357			HI.4802.003.N707---N506.F72_P1	Charron, Marsit et al. Nat Comm 2019
F72	BSc2	Tend	2.09483	1.62561			HI.4803.002.N709---N505.F72_P35	Charron, Marsit et al. Nat Comm 2019
F76	BSc2	Tini	2.09483	1.40338			HI.4802.001.N709---N506.F76_P1	Charron, Marsit et al. Nat Comm 2019
F76	BSc2	Tend	2.09483	1.27639			HI.4803.002.N710---N503.F76_P35	Charron, Marsit et al. Nat Comm 2019
F79	BSc2	Tini	2.09483	1.2826			HI.4802.003.N702---N517.F79_P1	Charron, Marsit et al. Nat Comm 2019
F79	BSc2	Tend	2.09483	1.29972			HI.4803.002.N711---N507.F79_P35	Charron, Marsit et al. Nat Comm 2019
F81	BSc2	Tini	2.09483	1.08394			HI.4802.001.N712---N517.F81_P1	Charron, Marsit et al. Nat Comm 2019
F81	BSc2	Tend	2.09483	2.28482			HI.4803.001.N706---N506.F81_P35	Charron, Marsit et al. Nat Comm 2019
F86	BSc2	Tini	2.09483	1.49139			NS.1249.002.N702---N505.F86_P1	Charron, Marsit et al. Nat Comm 2019
F86	BSc2	Tend	2.09483	1.54846			NS.1250.002.N703---N502.F86_P35	Charron, Marsit et al. Nat Comm 2019
F88	BSc2	Tini	2.09483	1.13785			HI.4802.002.N706---N504.F88_P1	Charron, Marsit et al. Nat Comm 2019
F88	BSc2	Tend	2.09483	1.19172			HI.4803.001.N711---N508.F88_P35	Charron, Marsit et al. Nat Comm 2019
F92	BSc2	Tini	2.09483	1.6284			NS.1249.001.N709---N507.F92_P1	Charron, Marsit et al. Nat Comm 2019
F92	BSc2	Tend	2.09483	1.56344			NS.1250.002.N701---N502.F92_P35	Charron, Marsit et al. Nat Comm 2019
