# Supplementary figures and images for: The effect of hybridization on transposable element accumulation in an undomesticated fungal species
Source: eLife journal article supplement (doi:10.7554/elife.60474), 2020-09-21

# YPR200C utg210\_pilon 13537

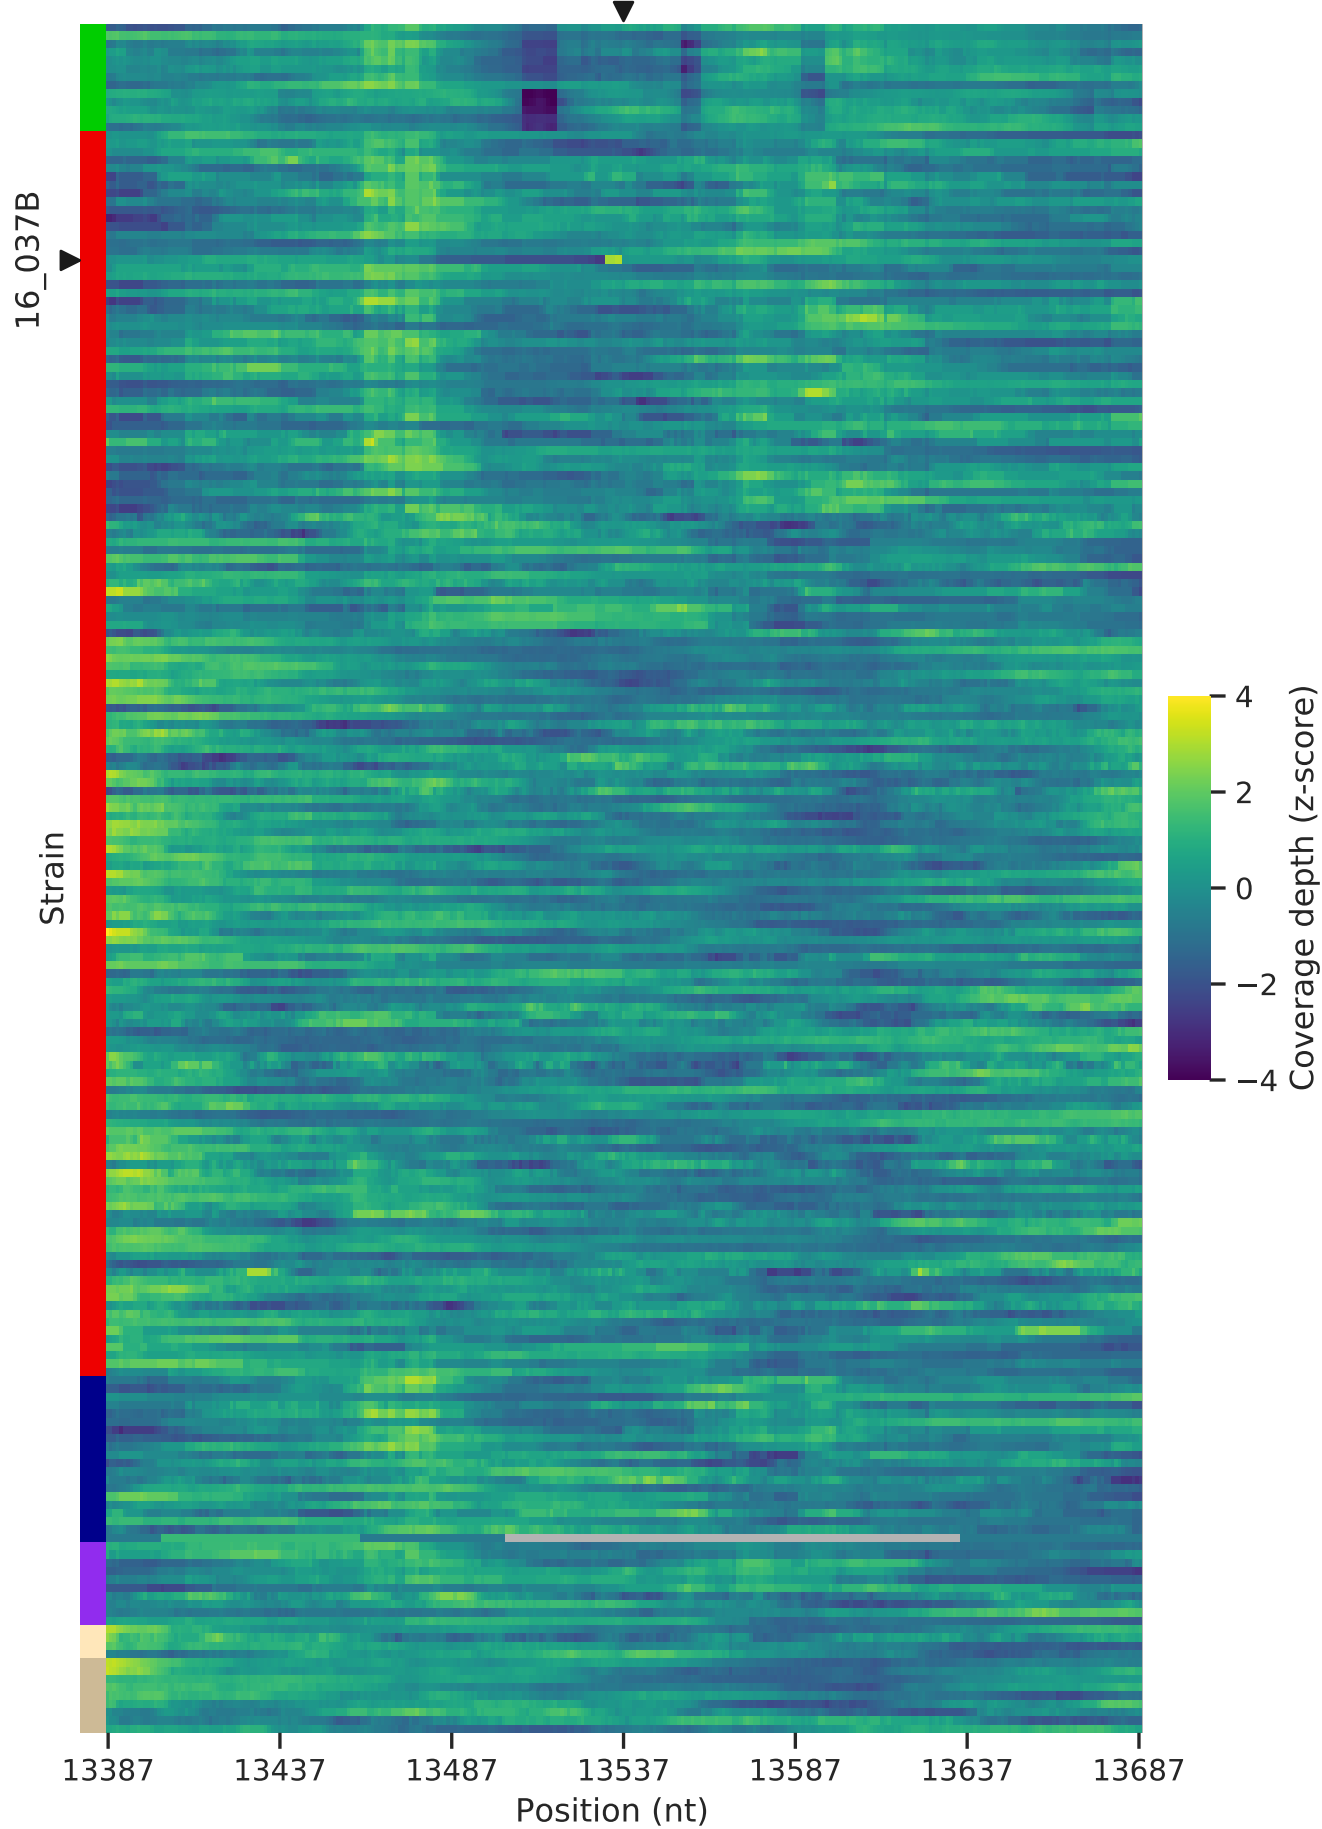

Supplement: supp [file elife-60474-supp-v1.zip]

# YDL024C utg988\_pilon 416698

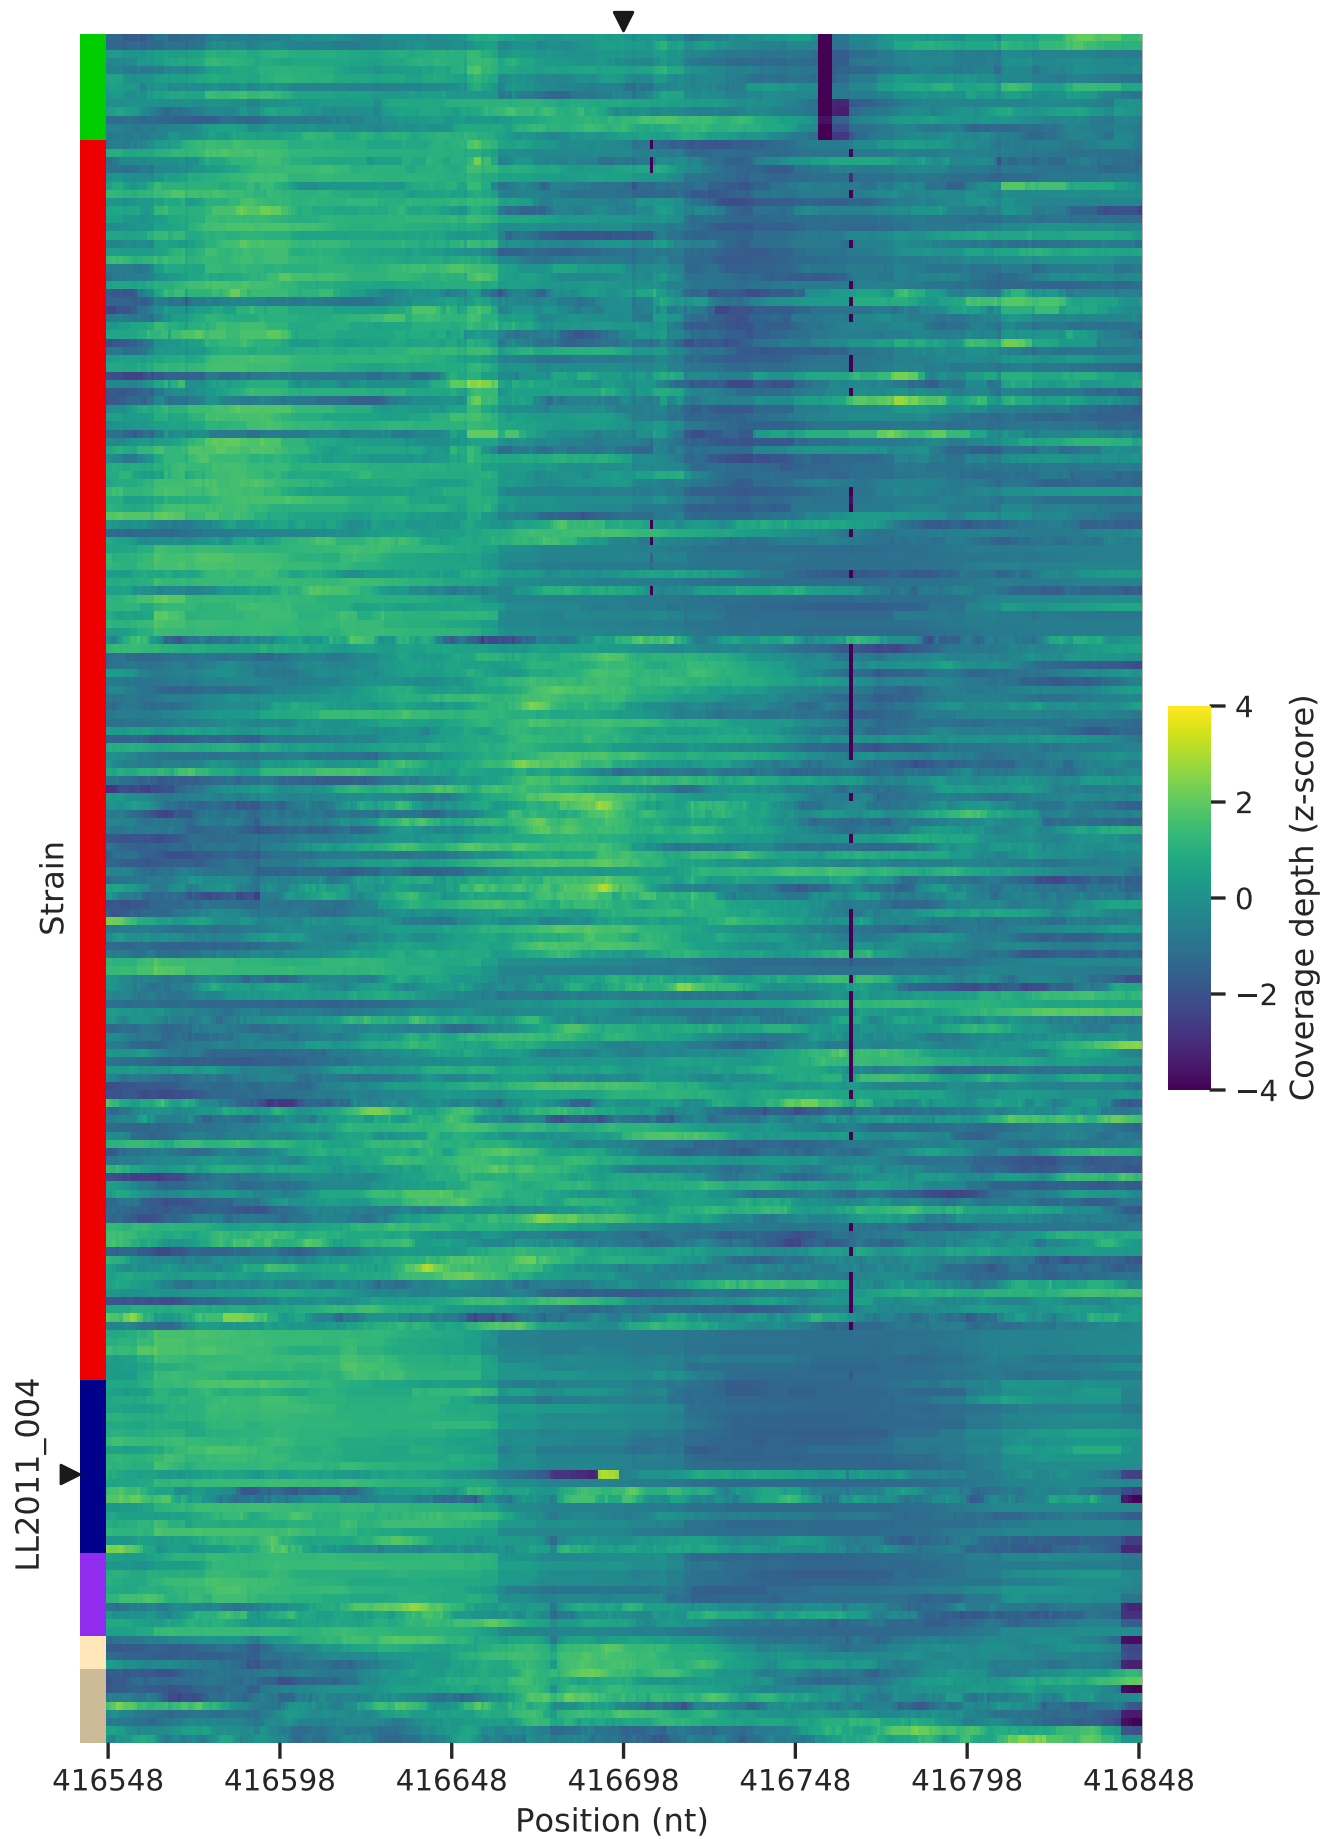

Supplement: supp [file elife-60474-supp-v1.zip]

Ty1

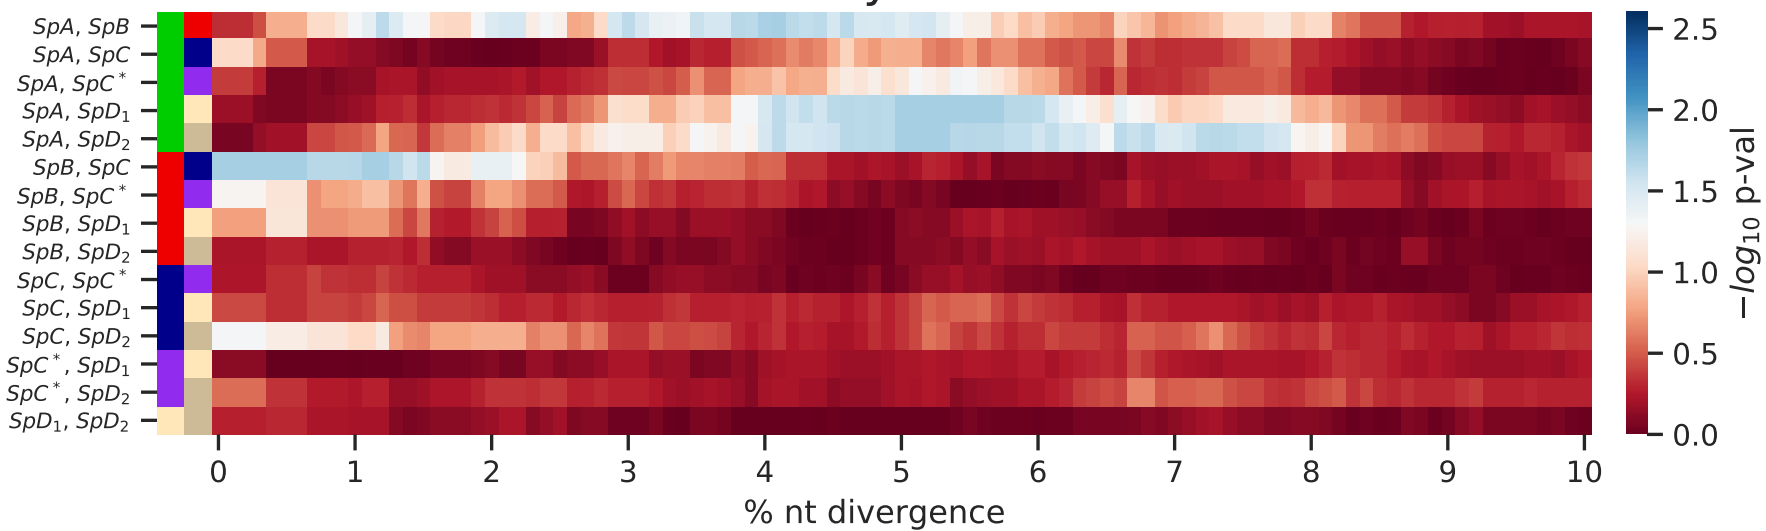

Ty3p

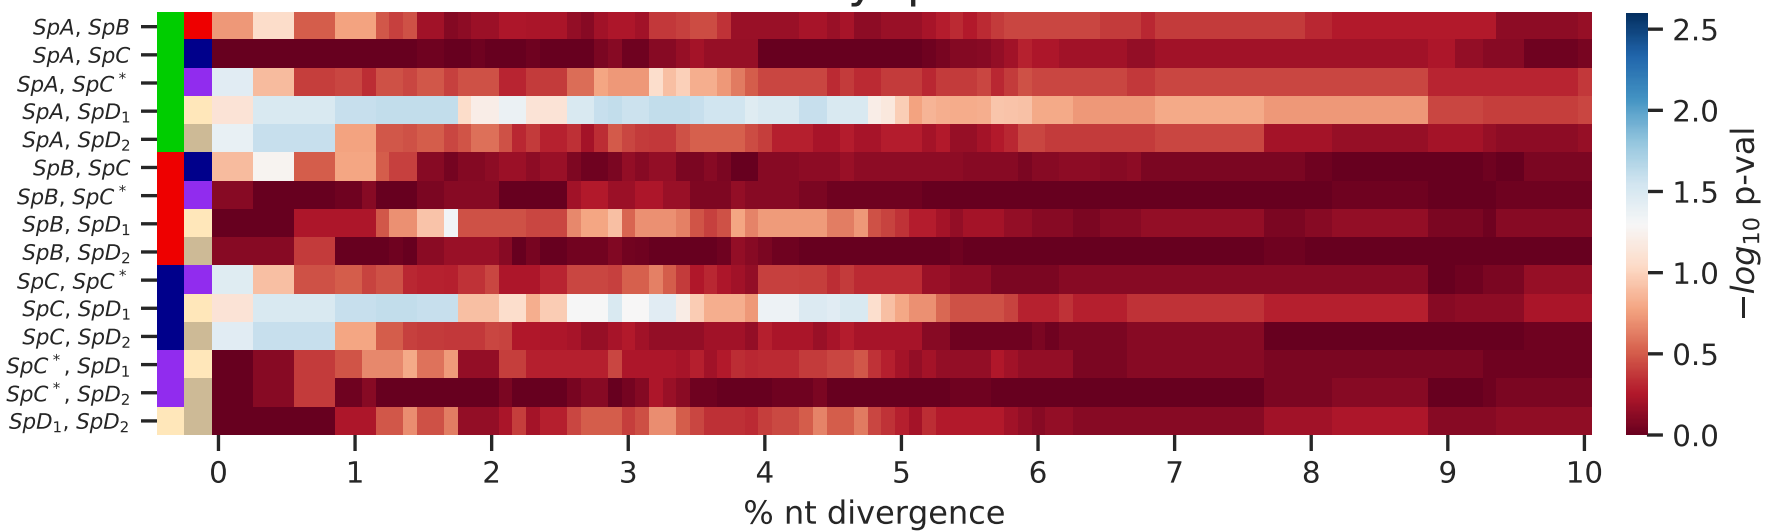

Tsu4/Ty4

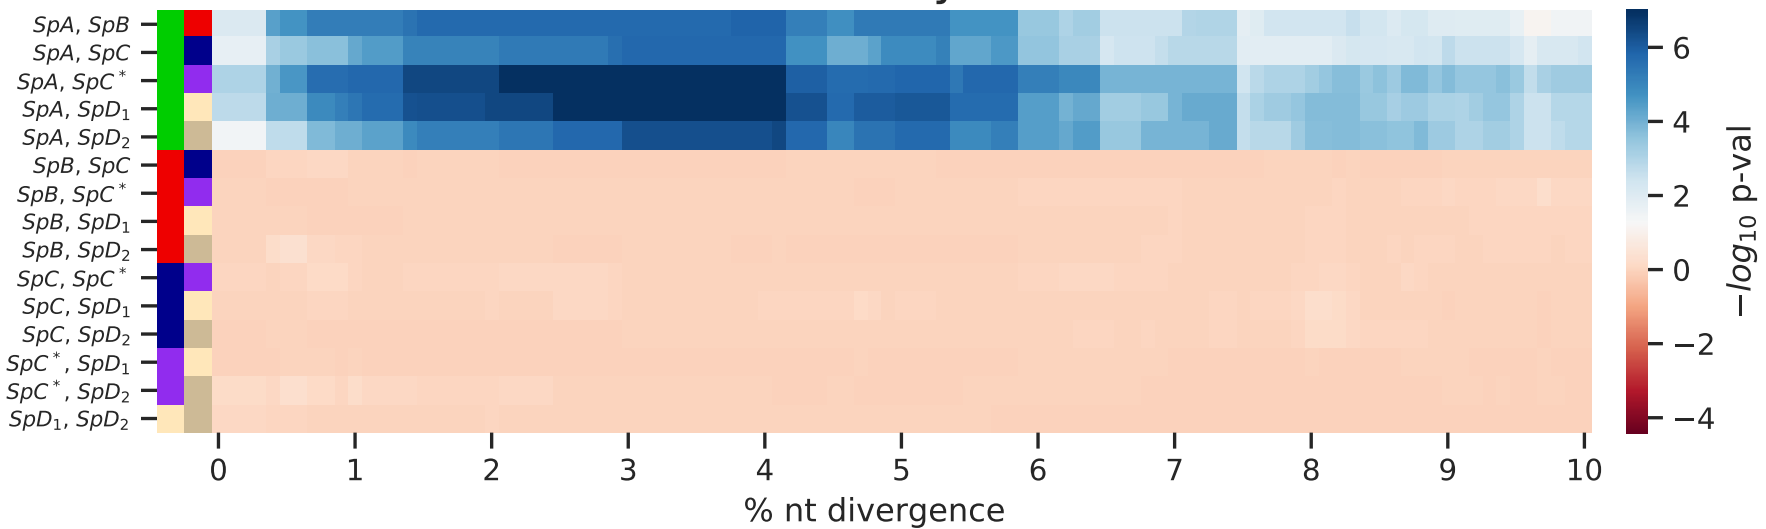

Supplement: supp [file elife-60474-supp-v1.zip]

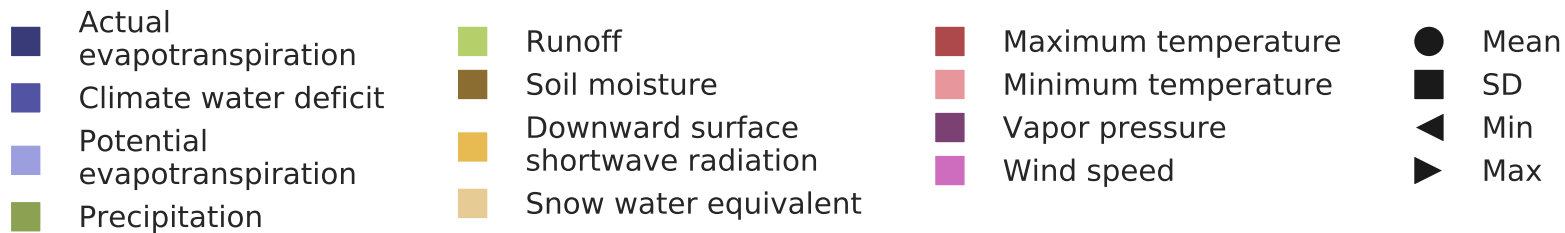

All lineages

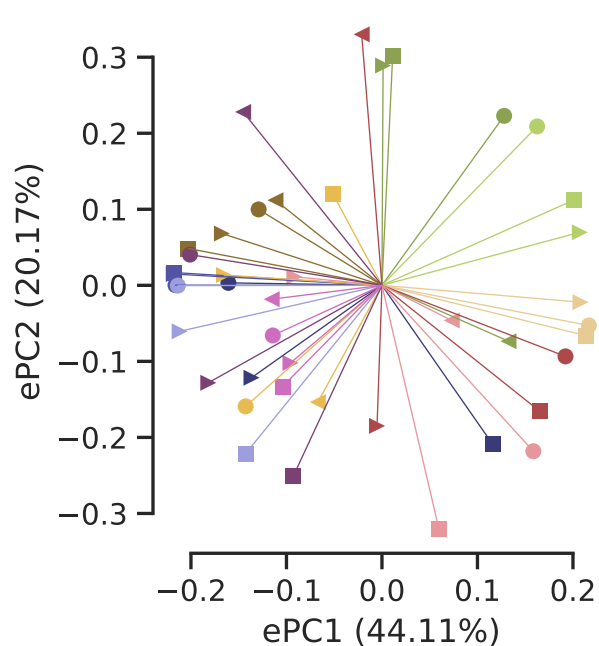

*SpB*

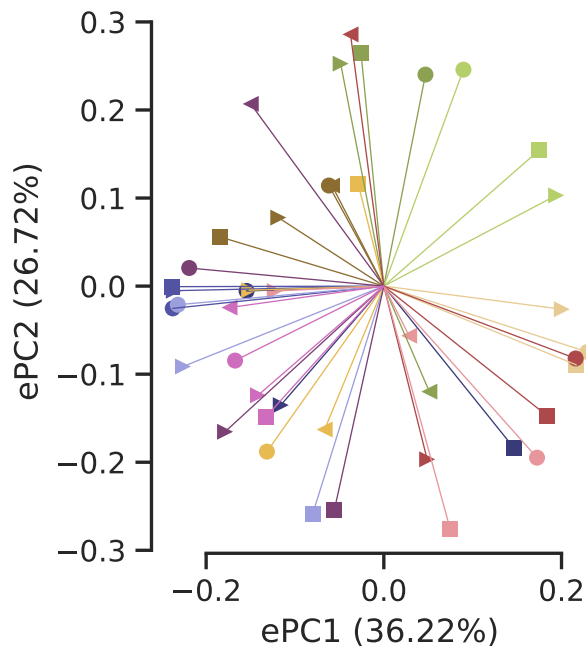

*SpC*

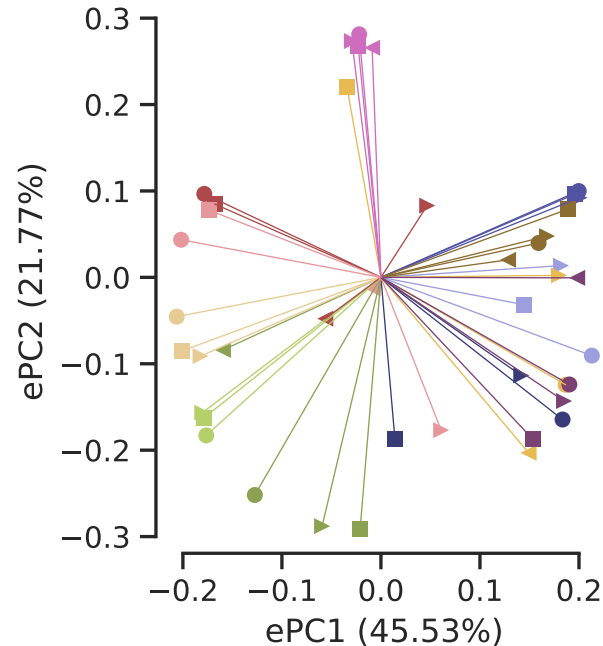

Supplement: supp [file elife-60474-supp-v1.zip]

Ty1

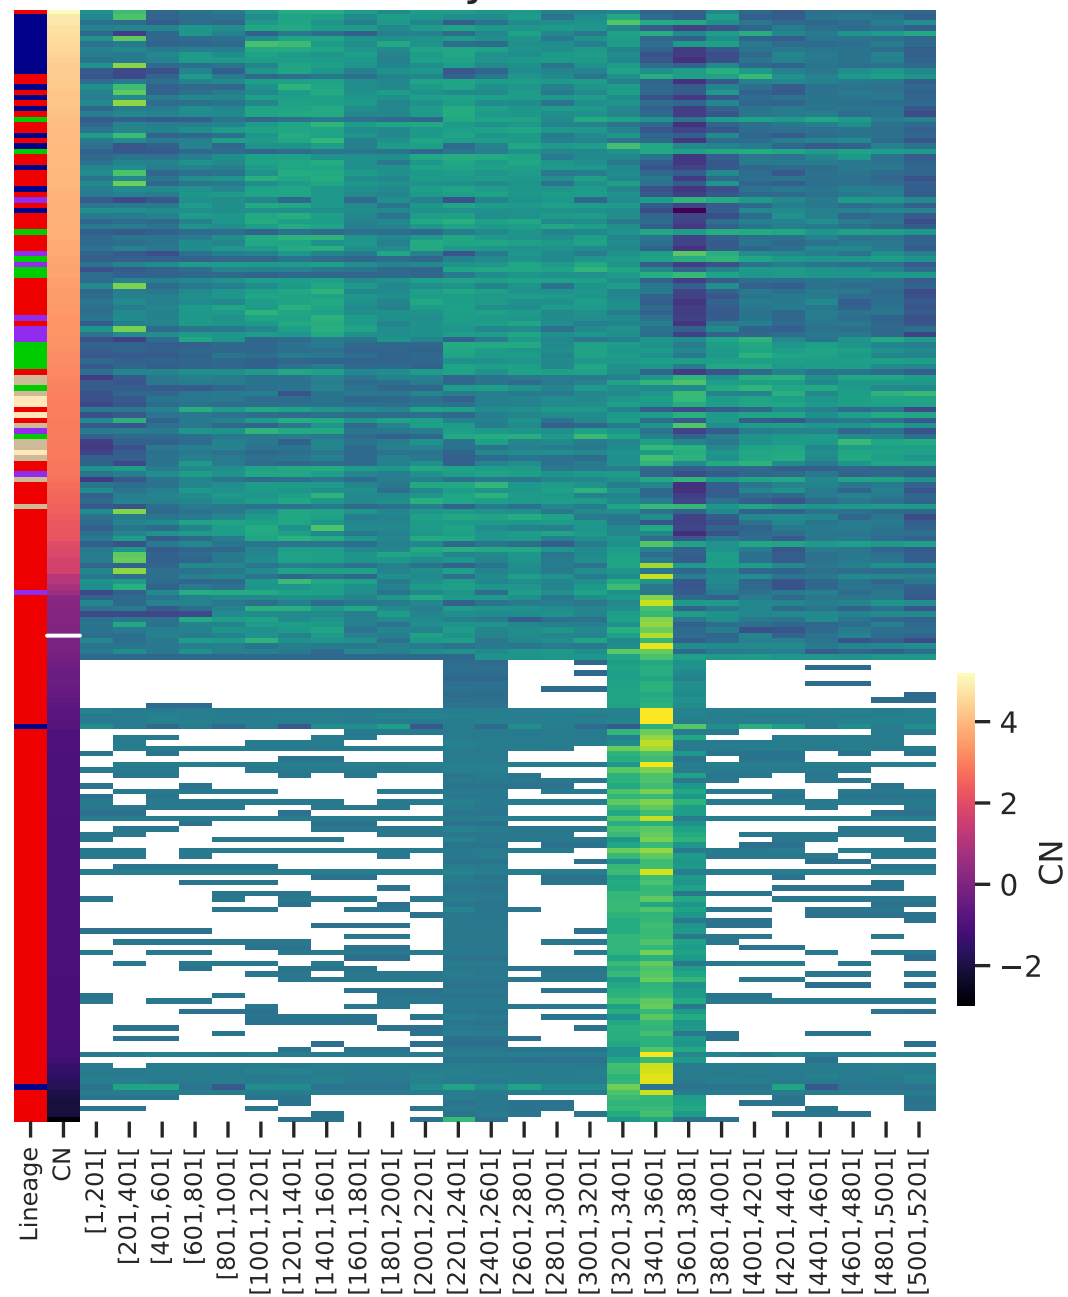

Ty3p

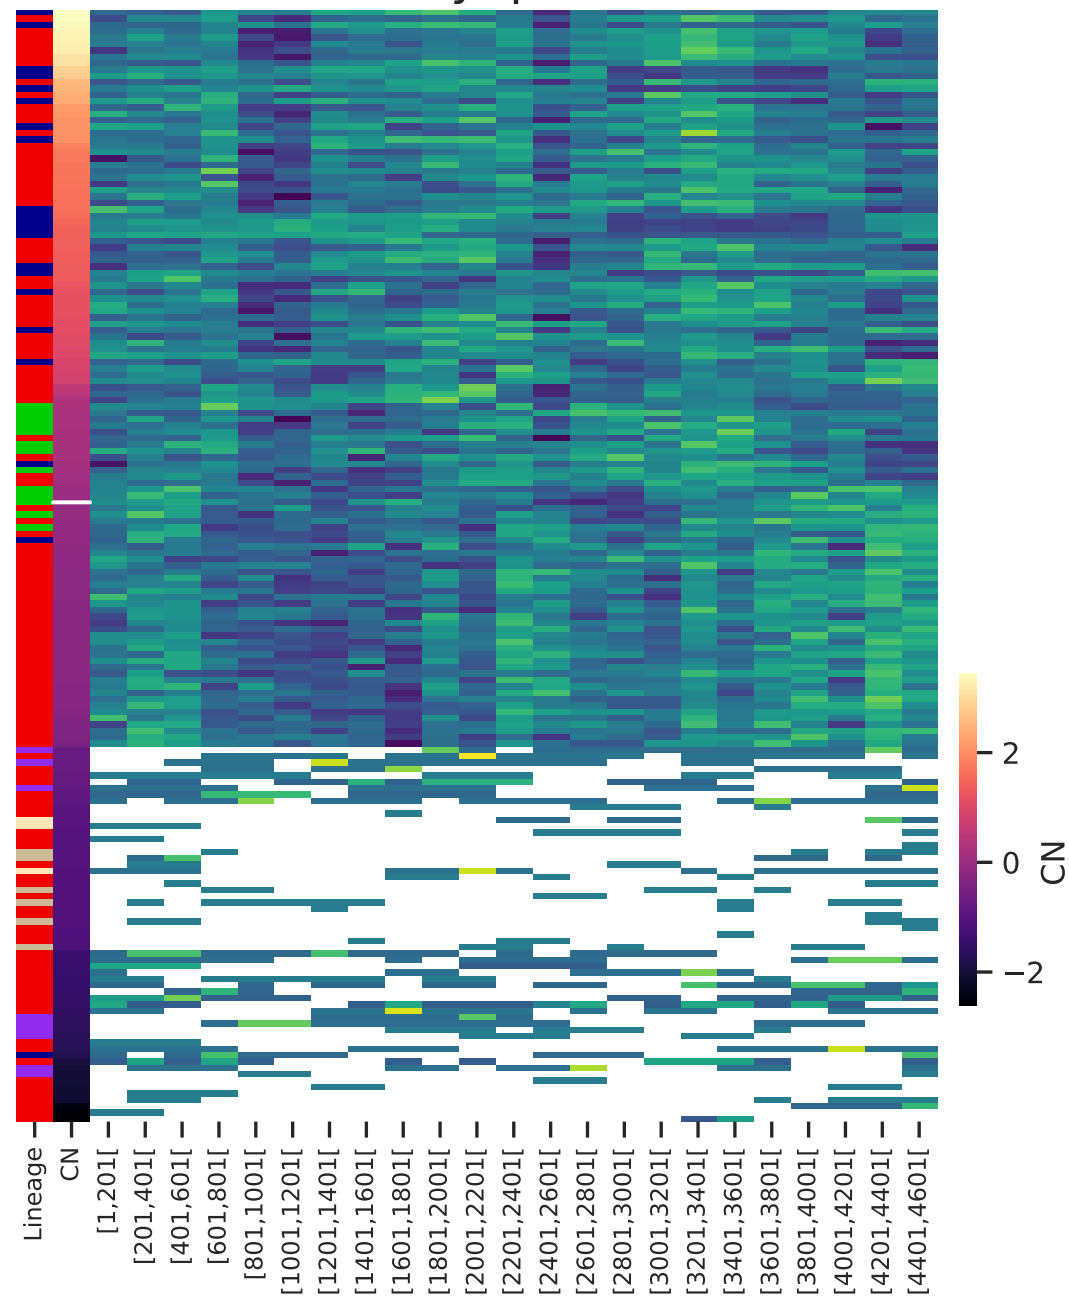

Tsu4

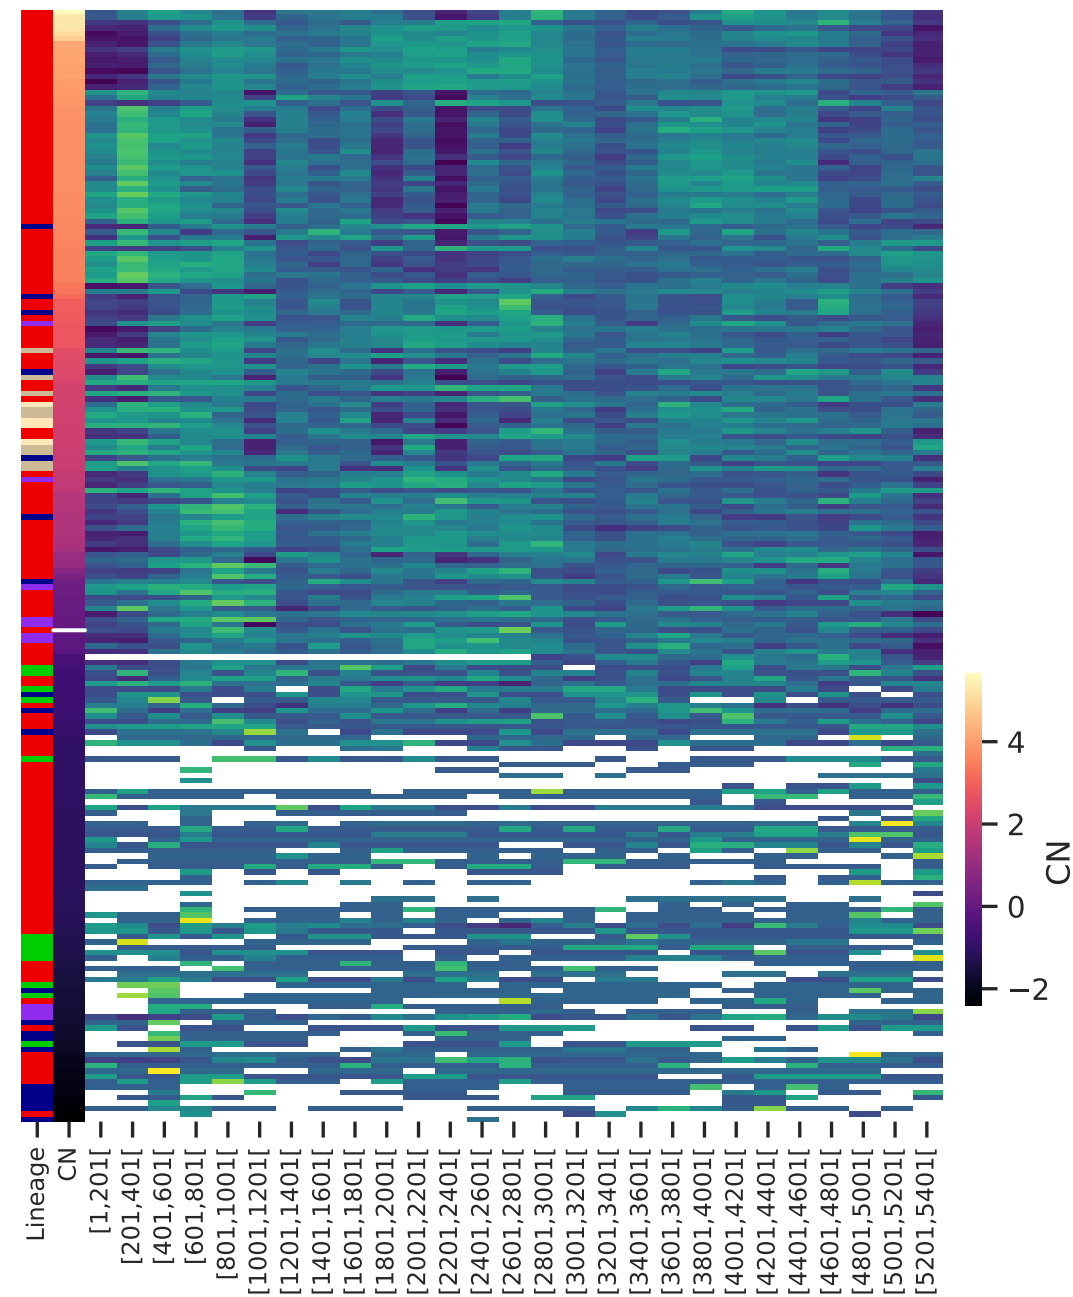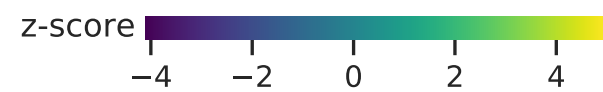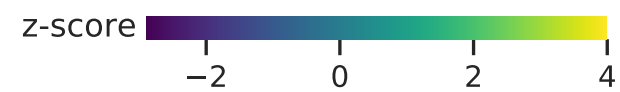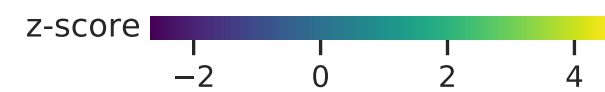

Supplement: supp [file elife-60474-supp-v1.zip]

# YPR201W utg210\_pilon 14670

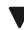

Strain

LL2011\_004

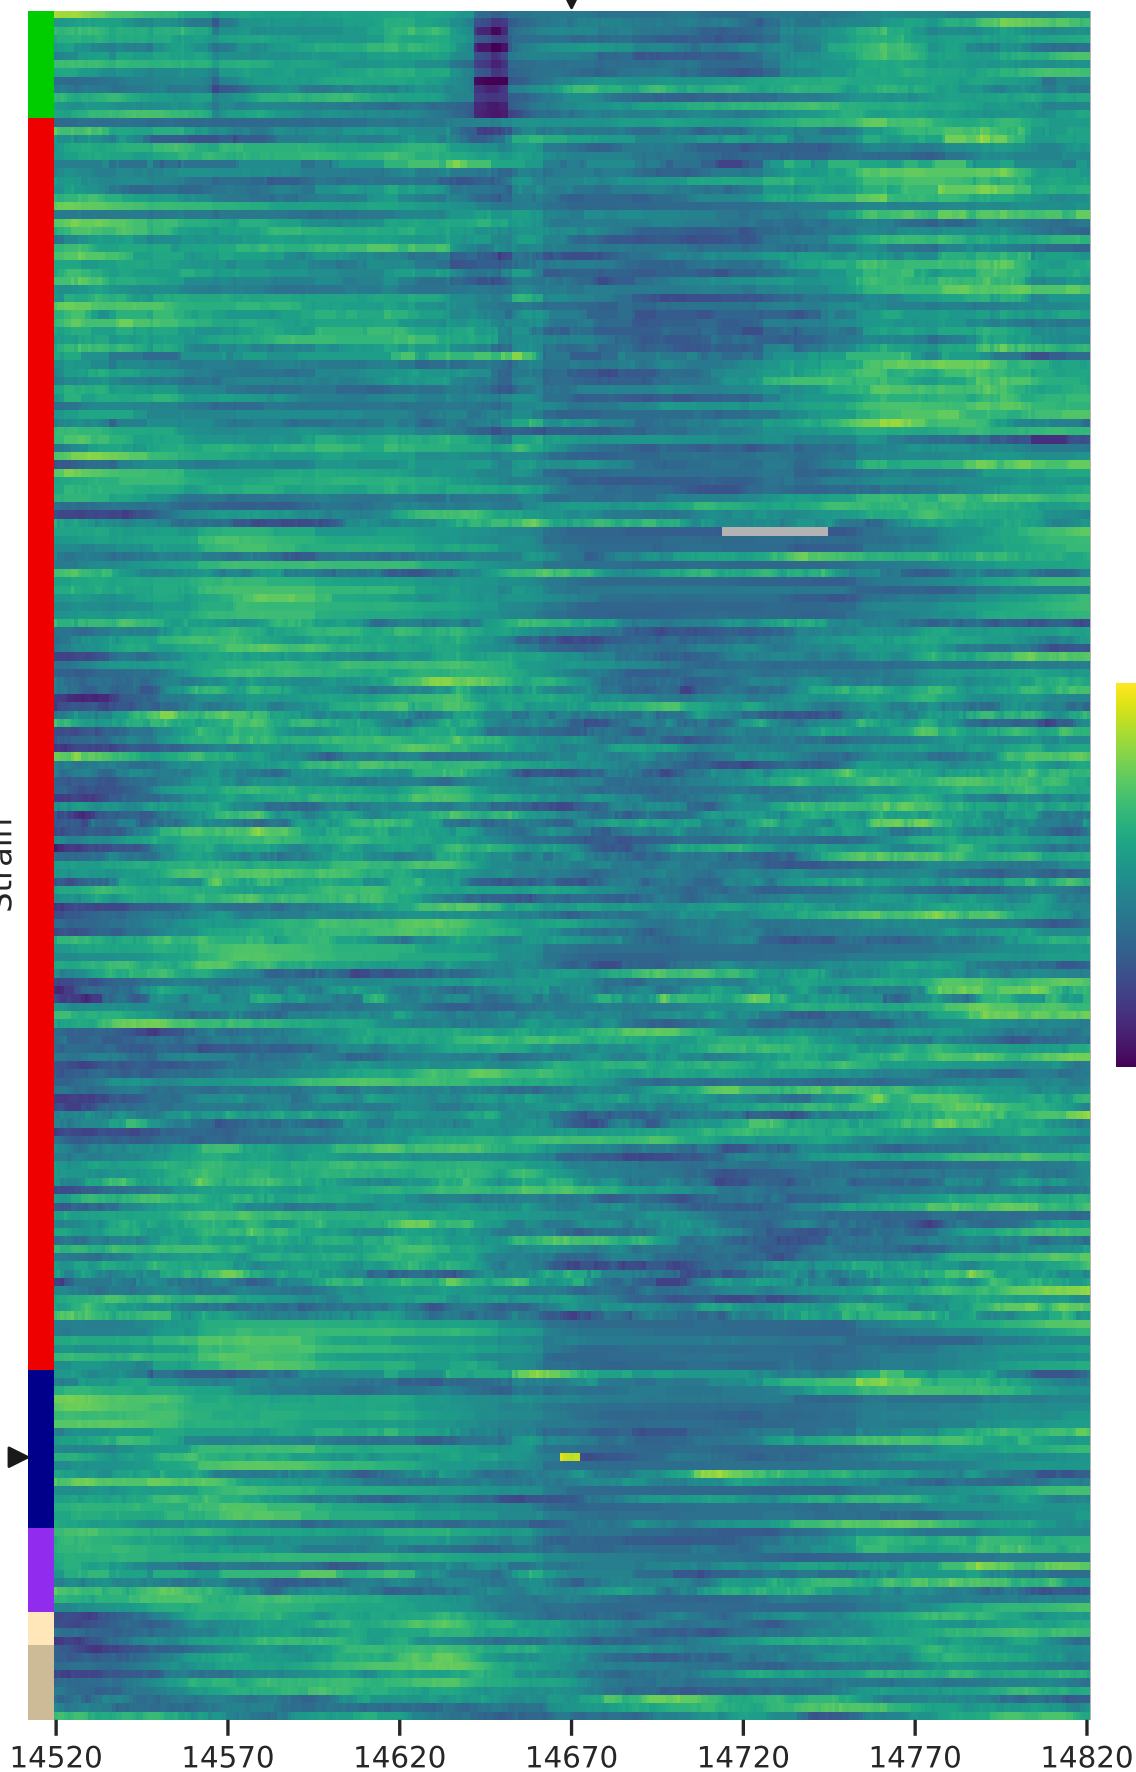

Coverage depth (z-score)

Supplement: supp [file elife-60474-supp-v1.zip]

# YDL024C

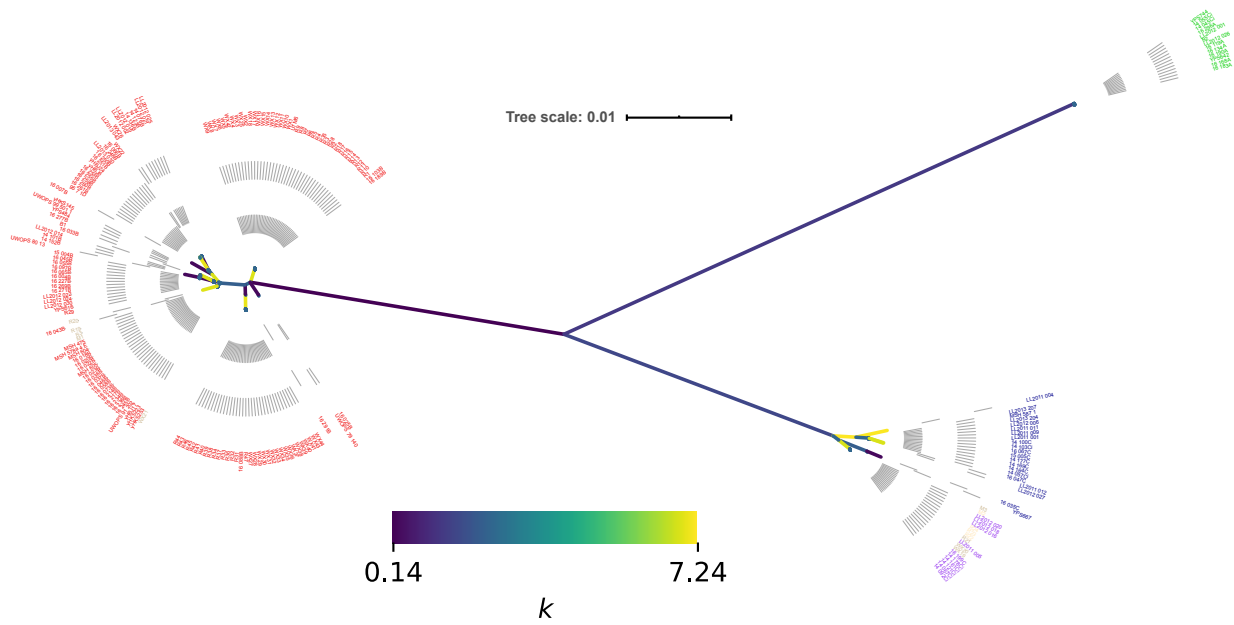

# YPR200C

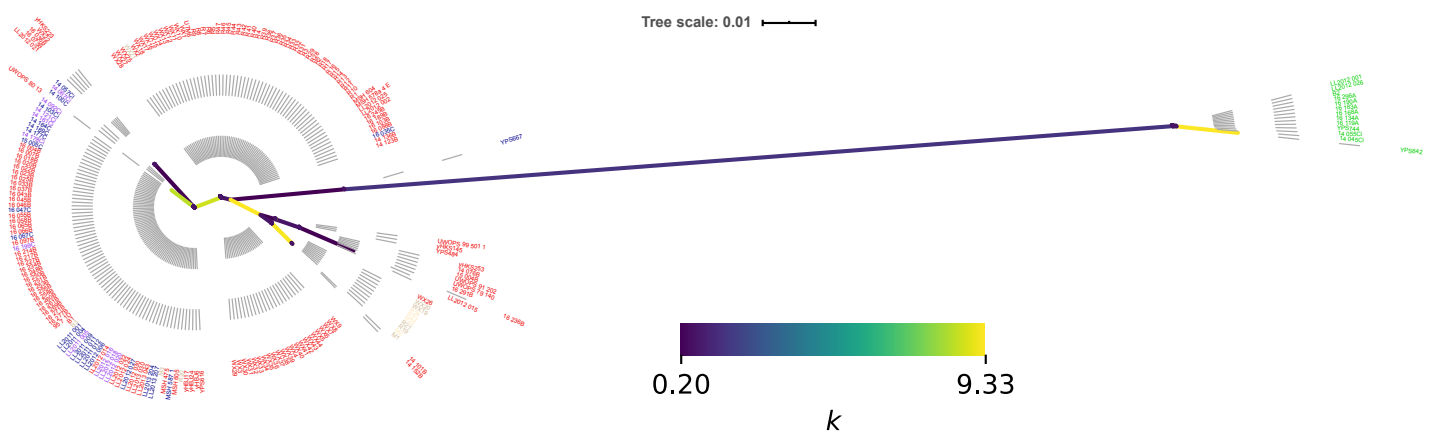

# YPR201W

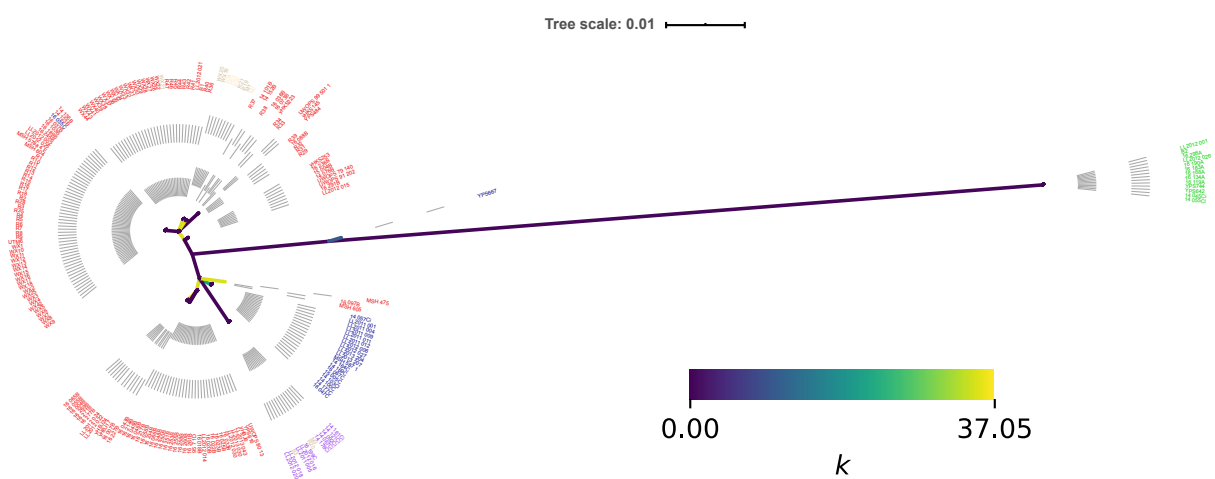

Supplement: supp [file elife-60474-supp-v1.zip]

**a**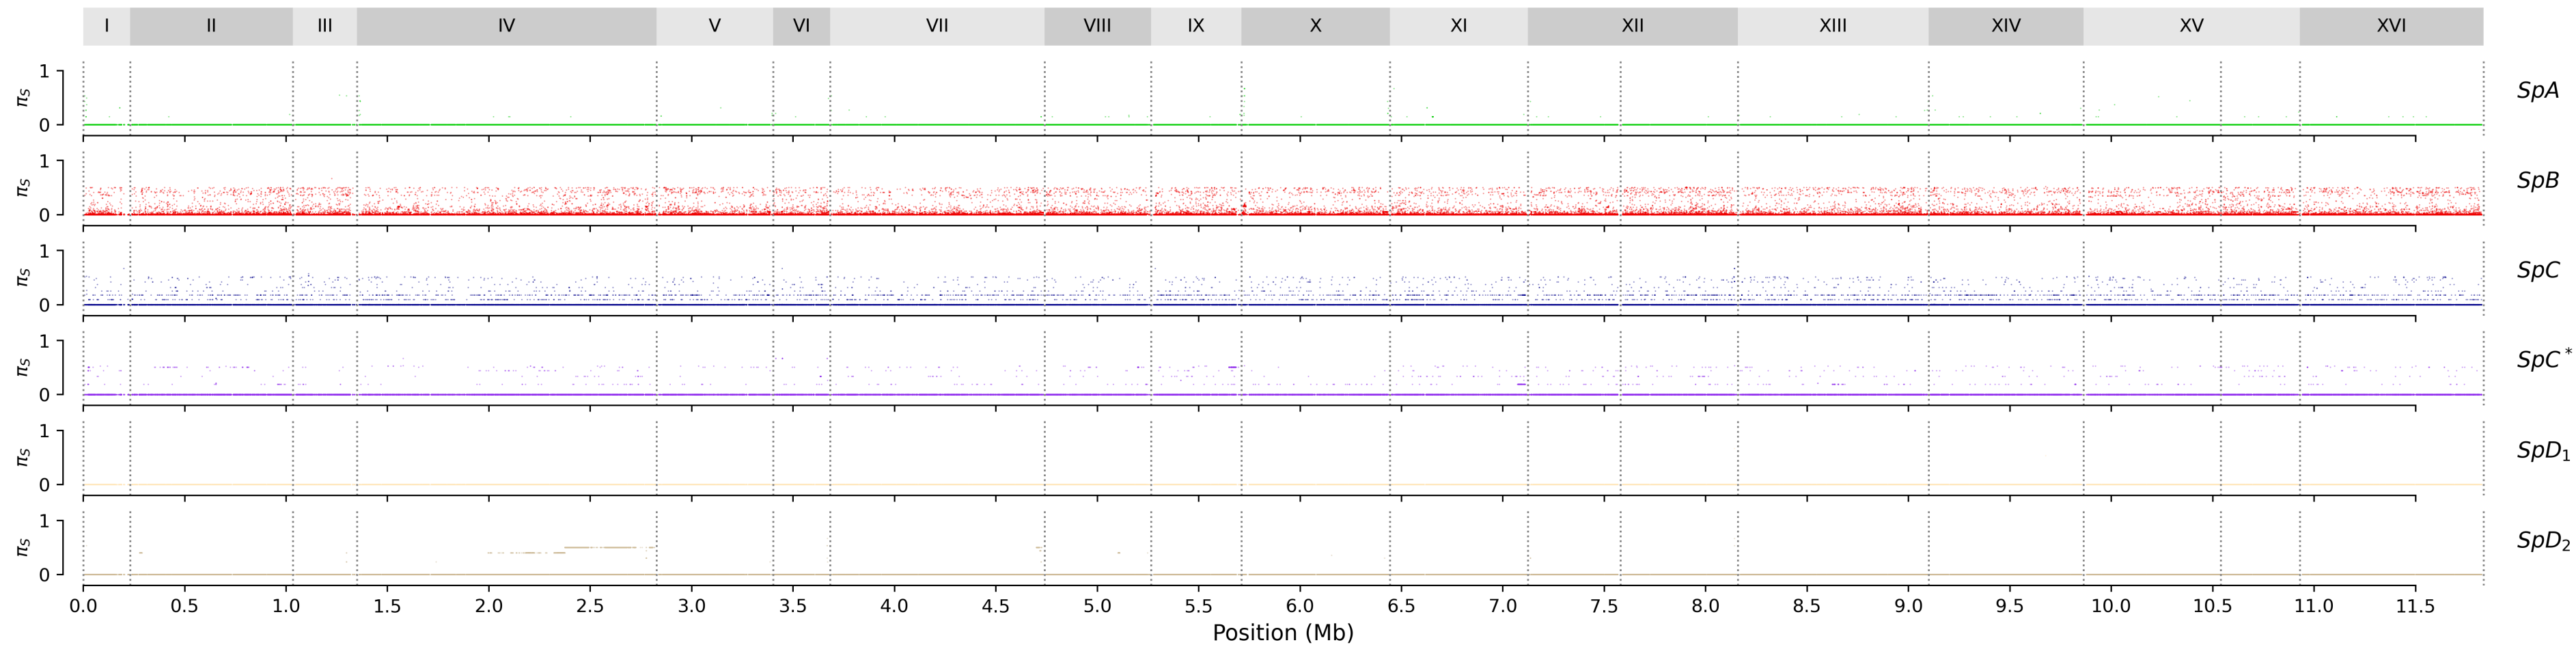**b**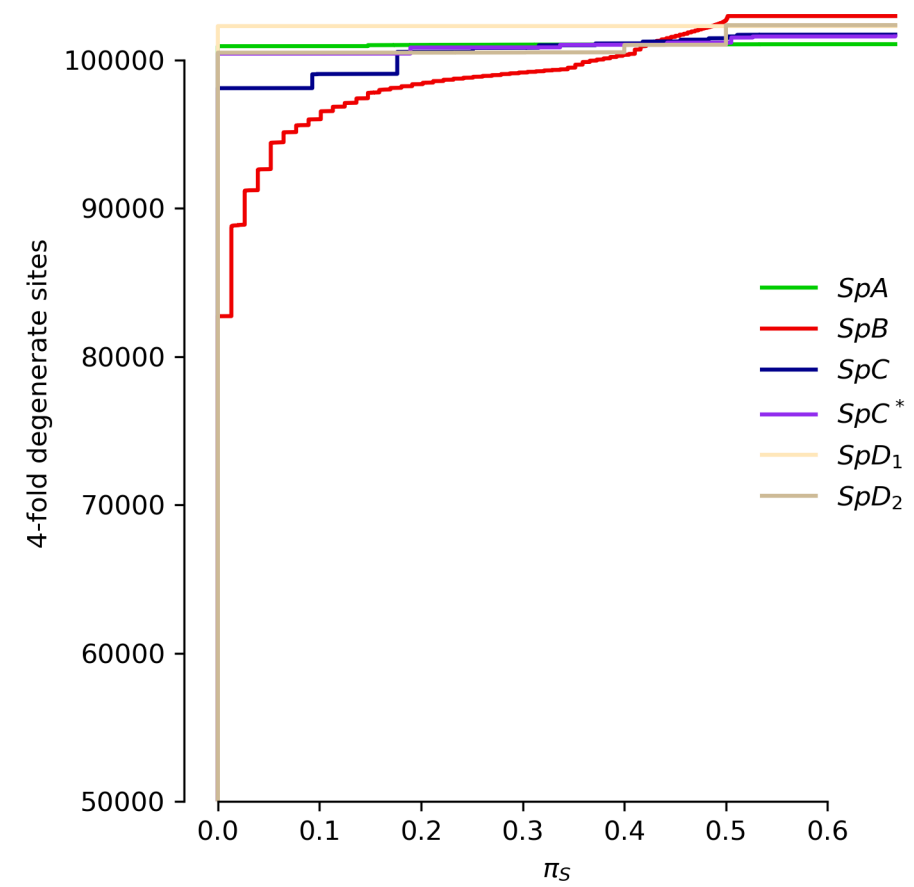**c**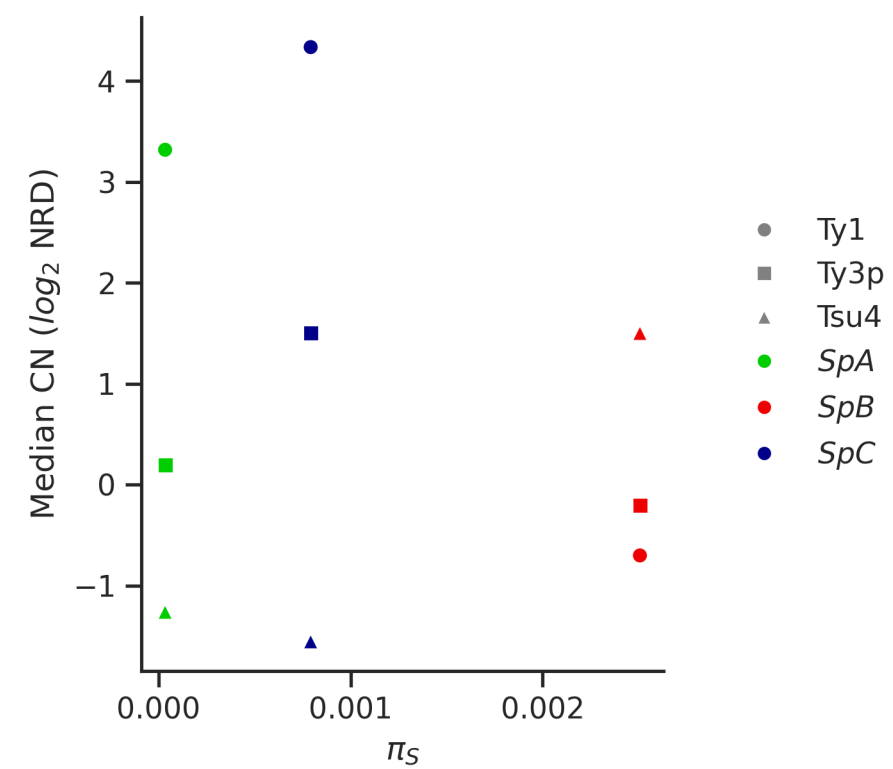

Supplement: supp [file elife-60474-supp-v1.zip]

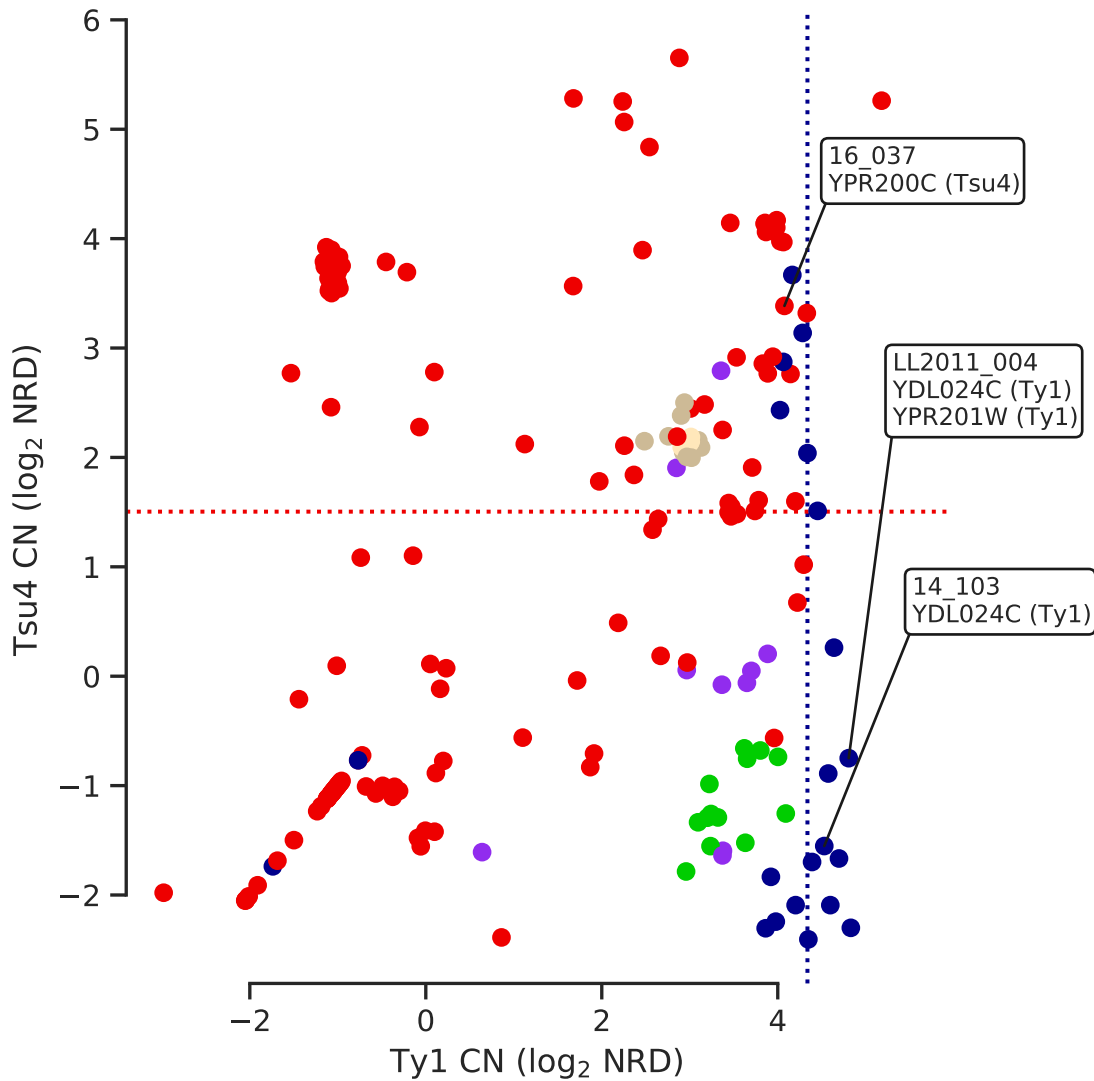

Supplement: supp [file elife-60474-supp-v1.zip]

■ *SpA*
■ *SpB*
■ *SpC*
■ *SpC*<sup>\*</sup>
■ *SpD*<sub>1</sub>
■ *SpD*<sub>2</sub>

Full-length

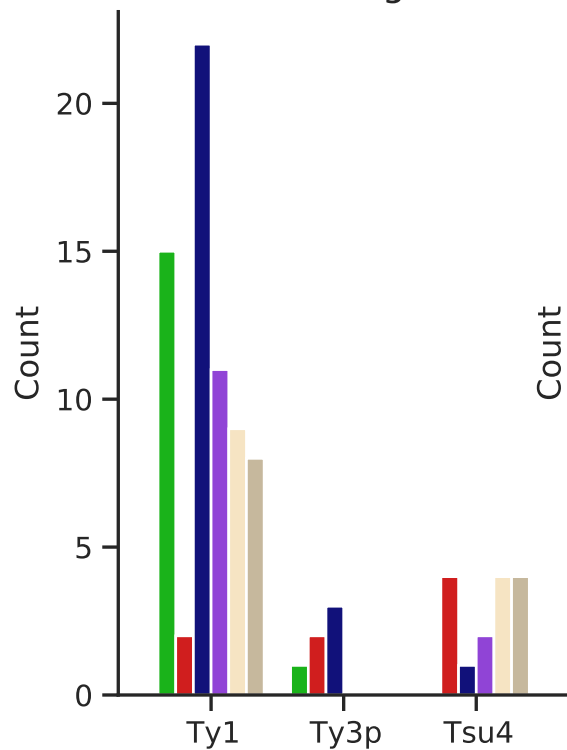

Solo LTR

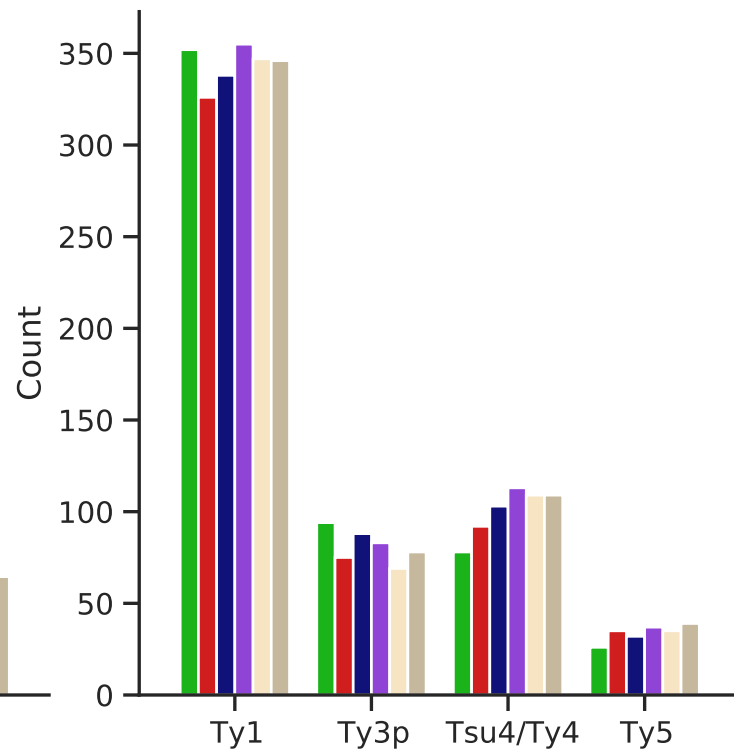

Truncated

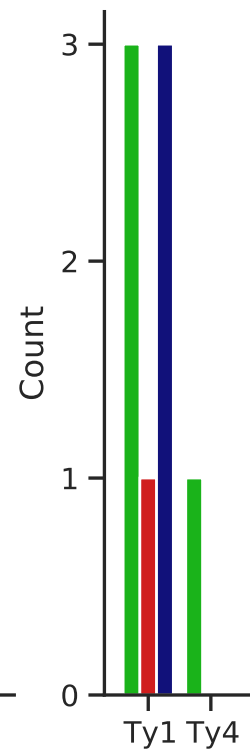

Solo internal

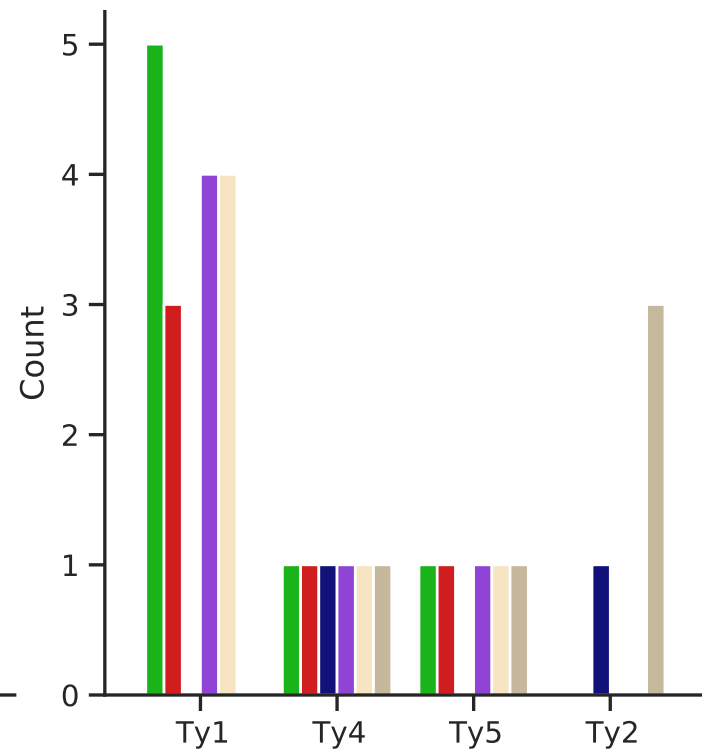

Supplement: supp [file elife-60474-supp-v1.zip]

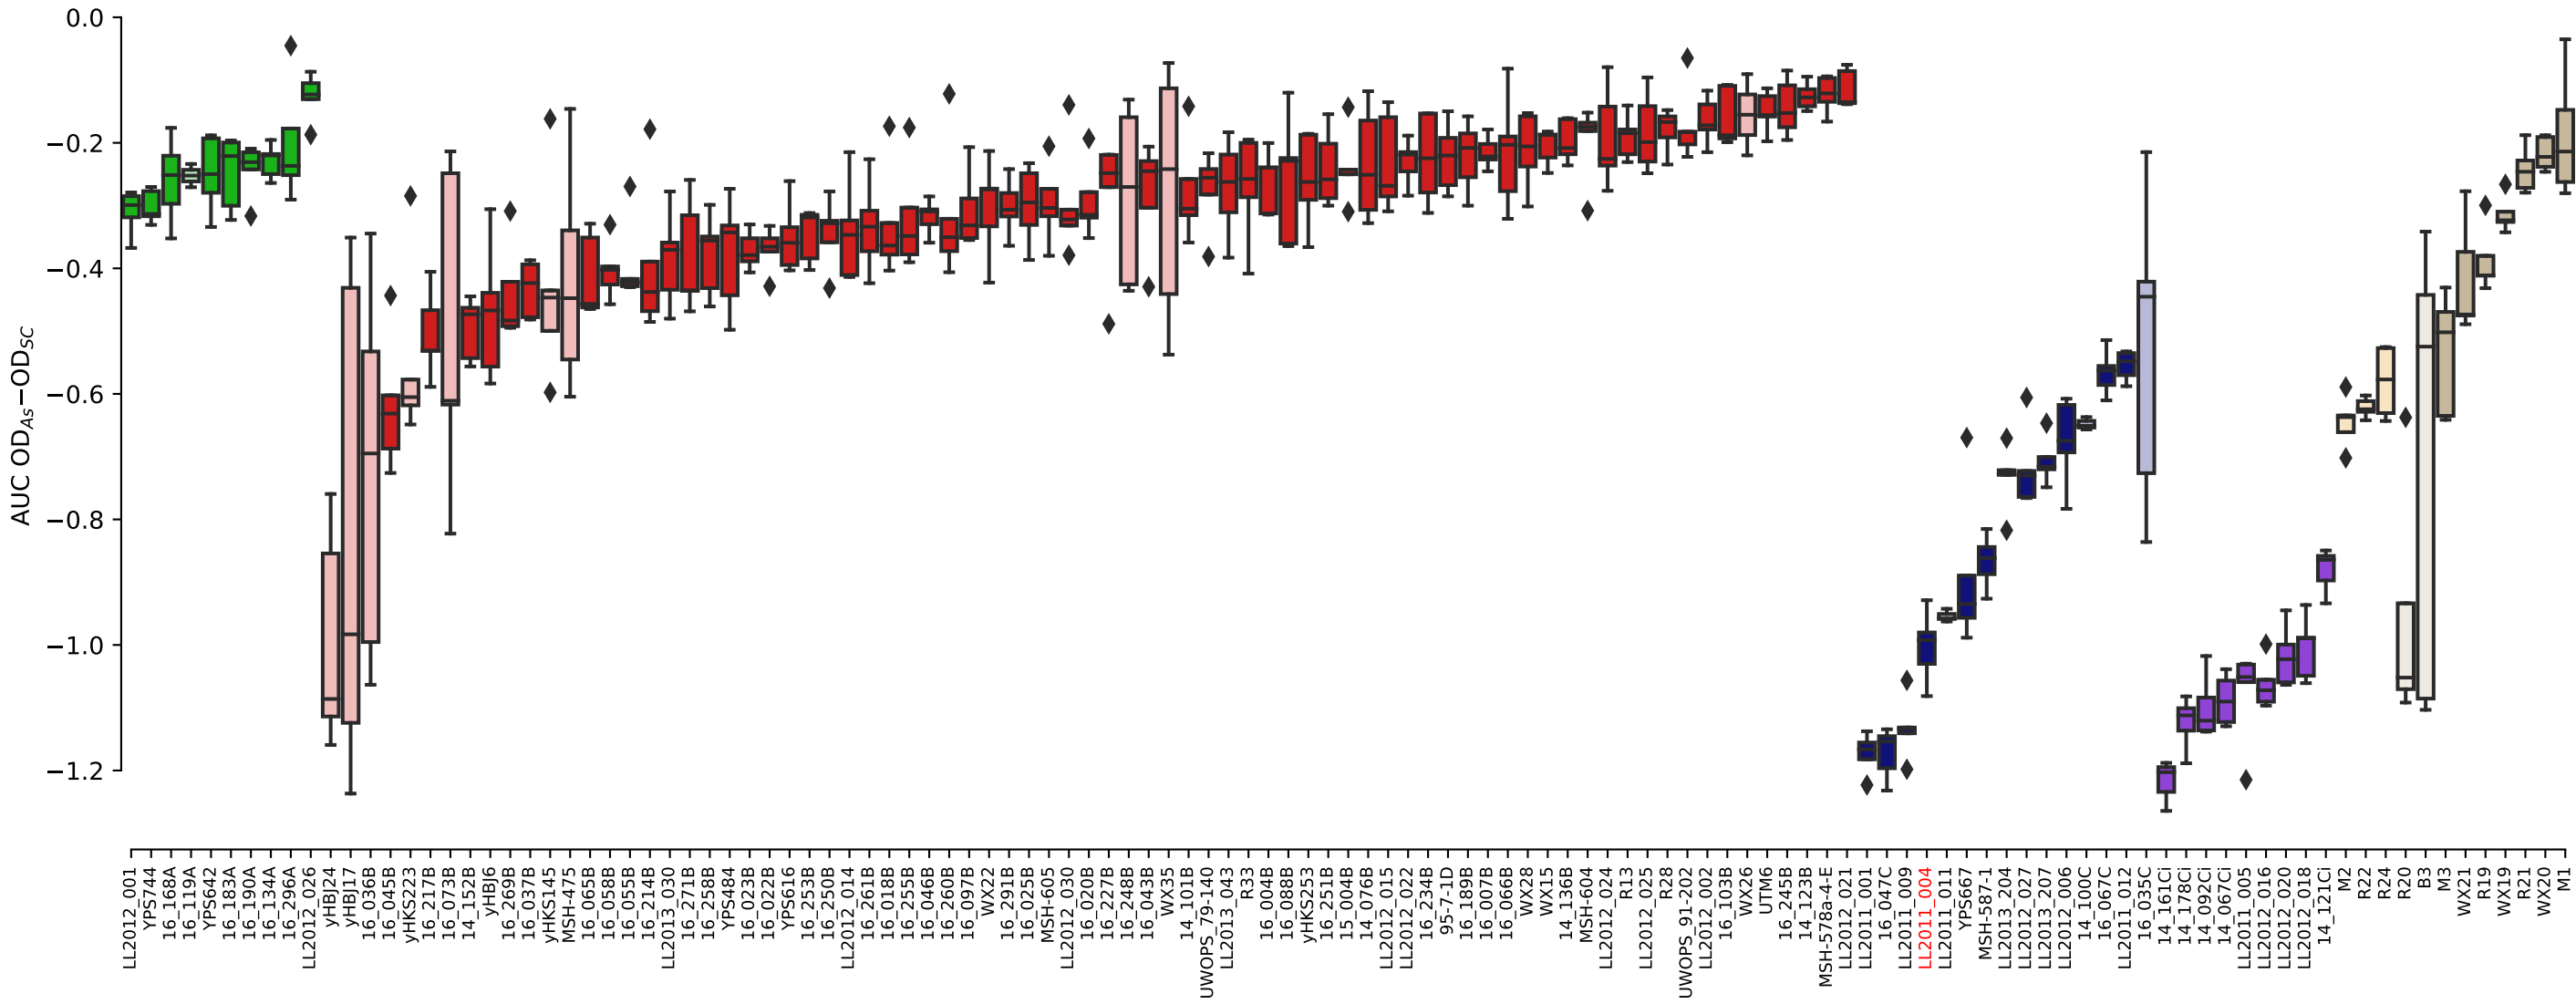

Supplement: supp [file elife-60474-supp-v1.zip]

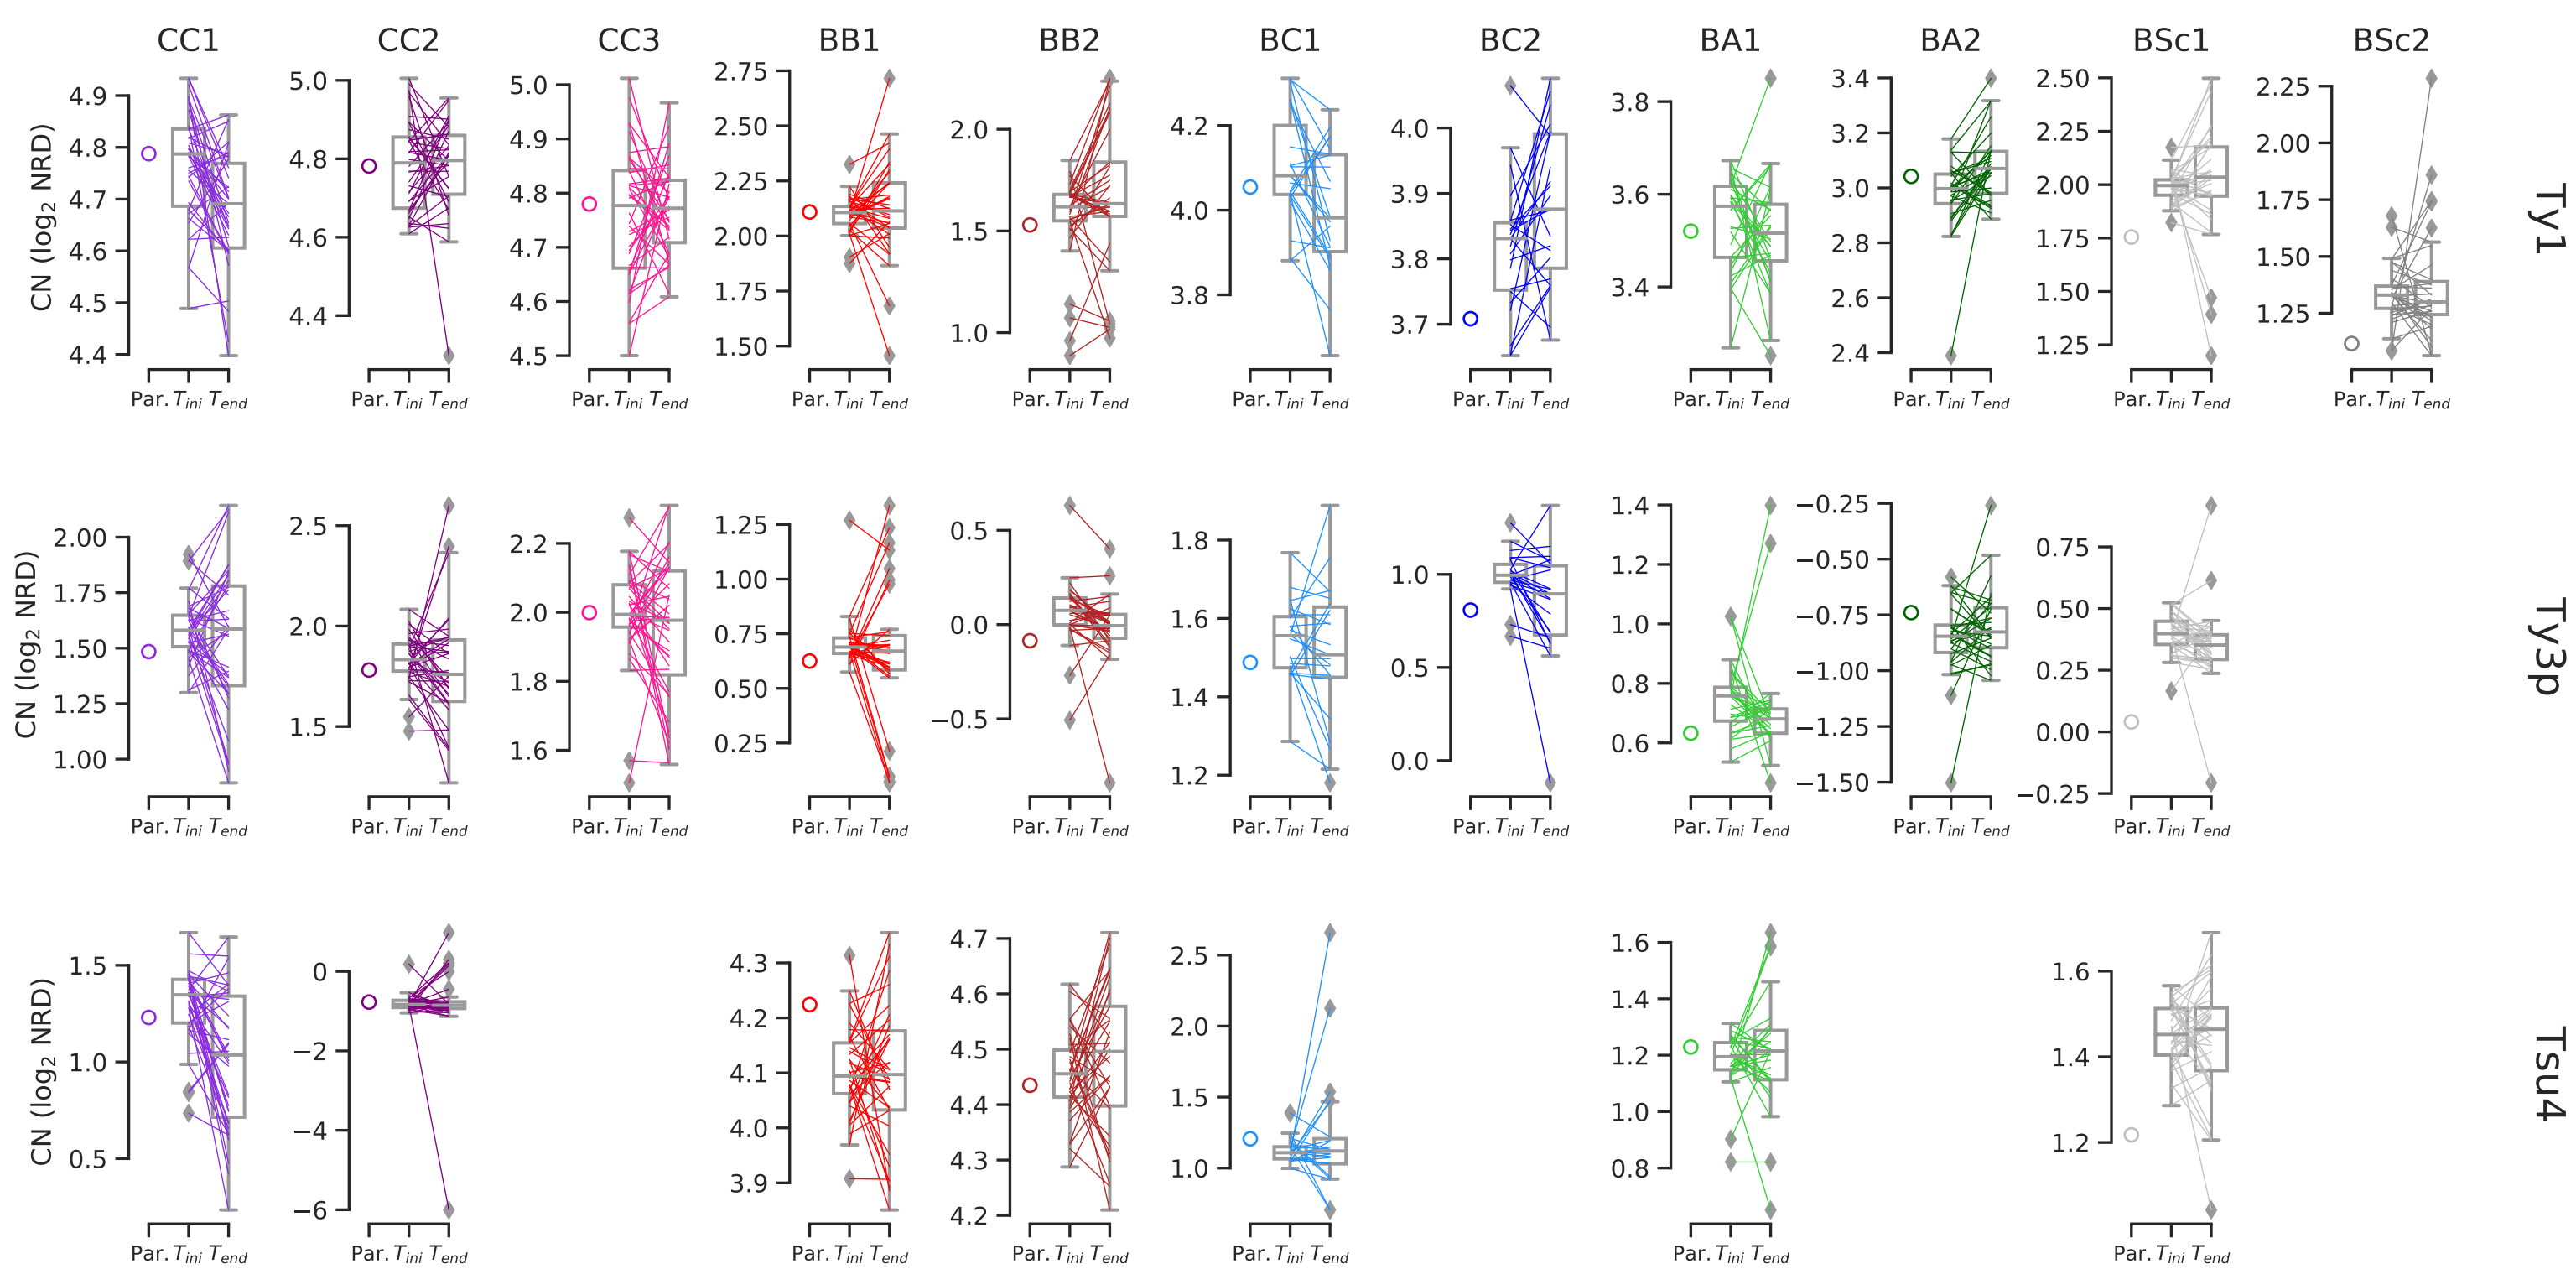

Supplement: supp [file elife-60474-supp-v1.zip]

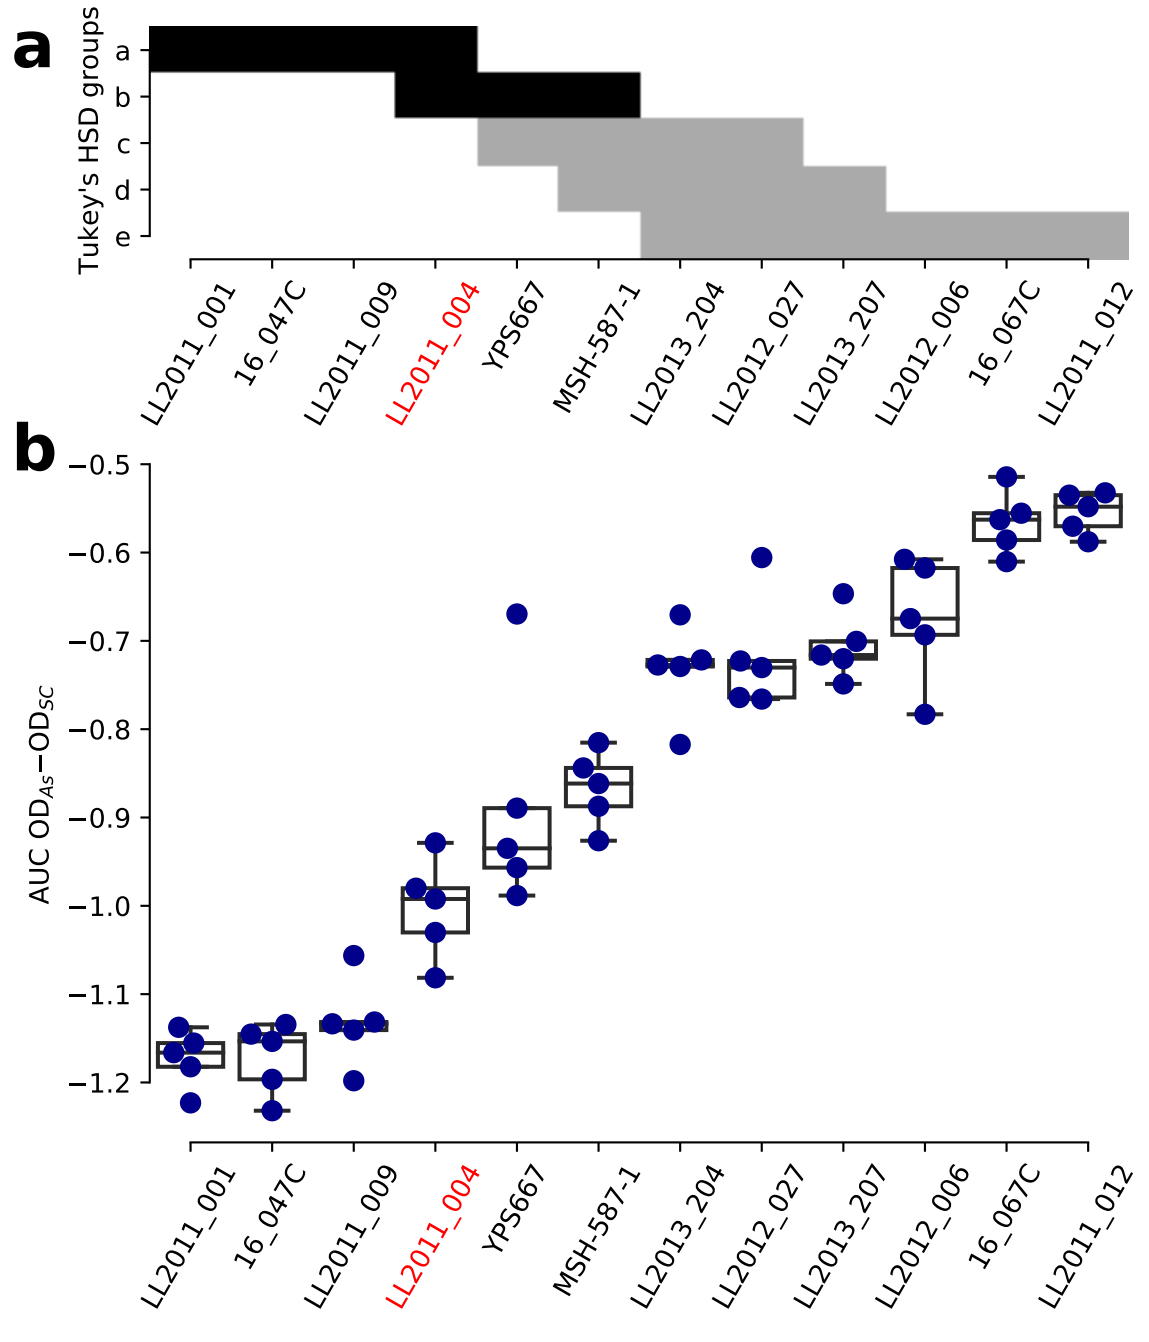

Supplement: supp [file elife-60474-supp-v1.zip]

■ Ty1 ■ Ty3p ■ Tsu4/Ty4 ■ Ty5

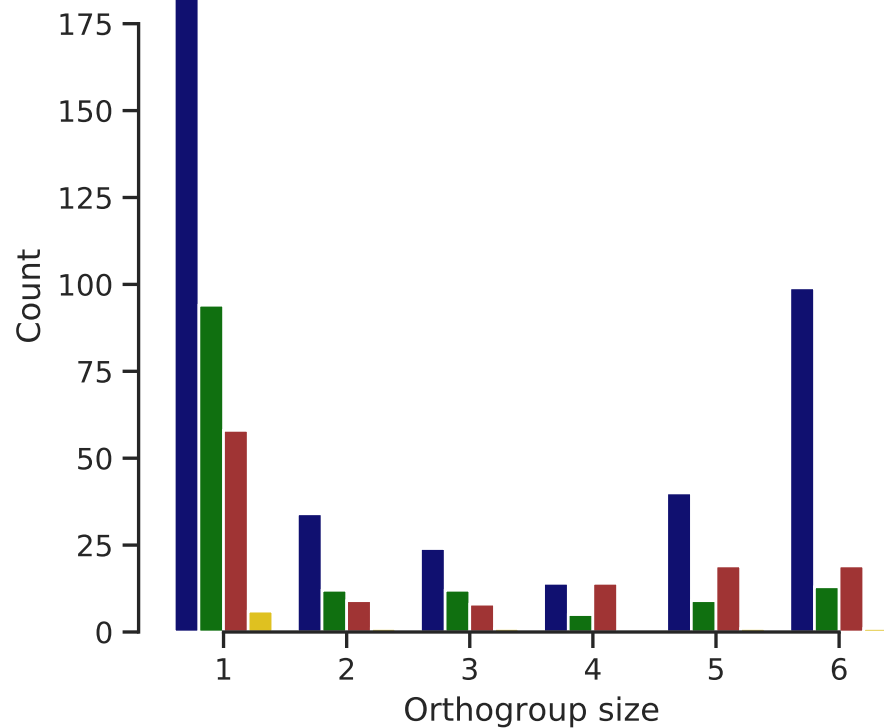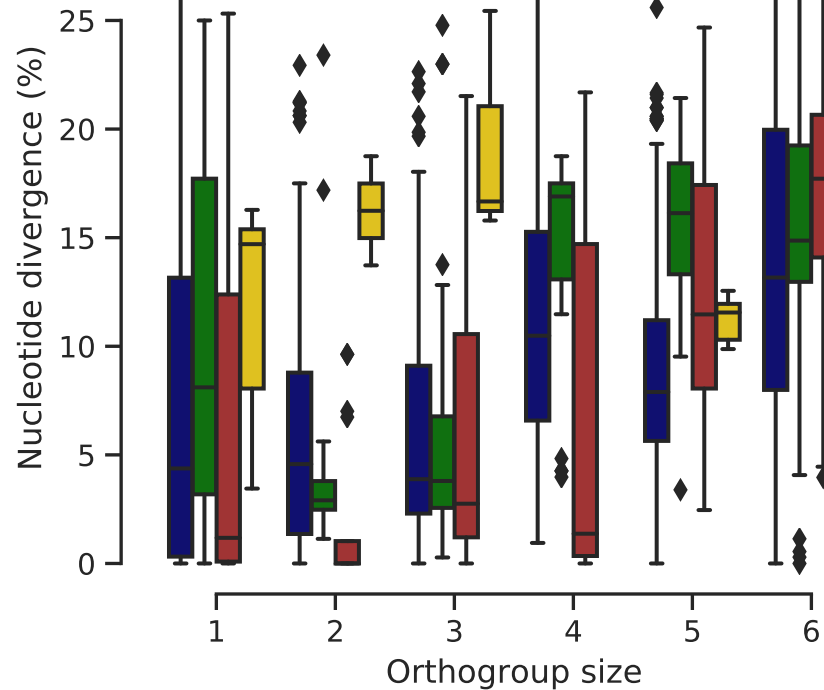

Supplement: supp [file elife-60474-supp-v1.zip]

# YDL024C utg988\_pilon 416193

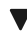

Strain

14\_103Ci

Coverage depth (z-score)

416043 416093 416143 416193 416243 416293 416343

Position (nt)

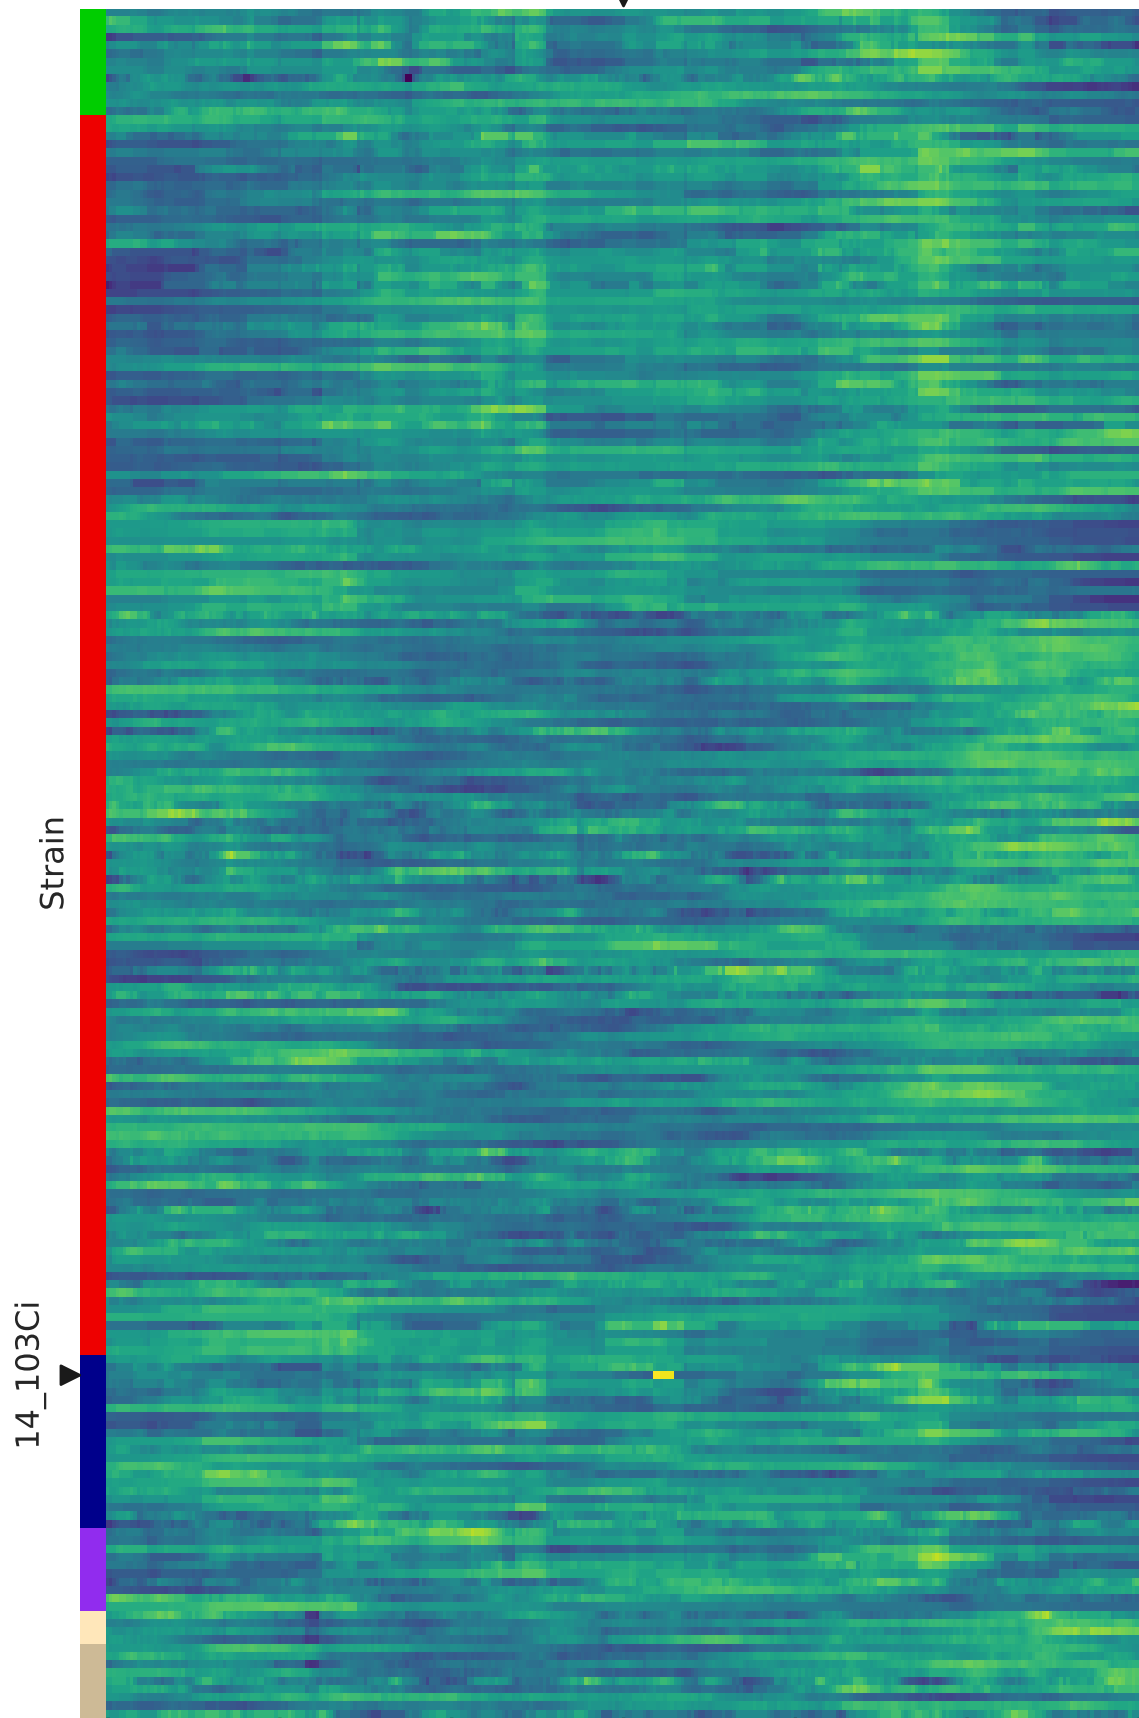

Supplement: supp [file elife-60474-supp-v1.zip]

All lineages

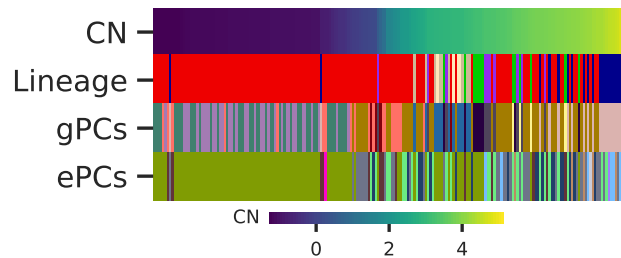*SpB*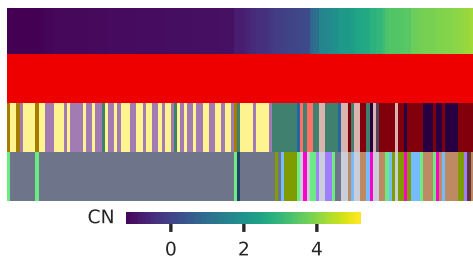*SpC*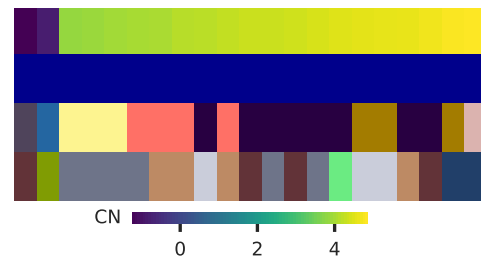

Ty1

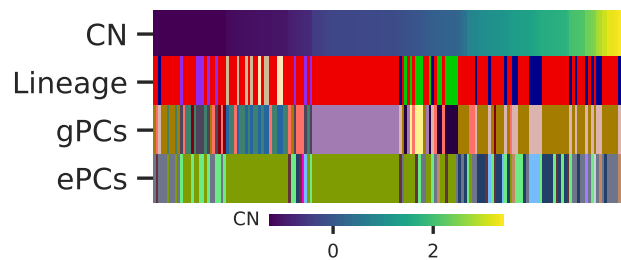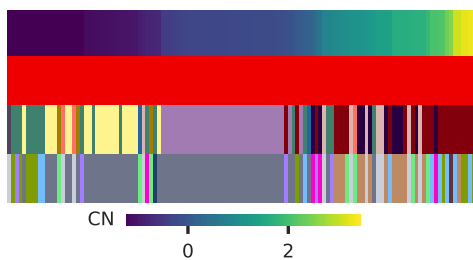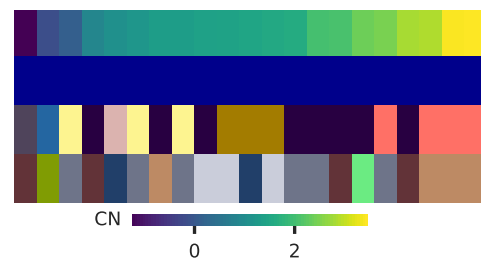

Ty3p

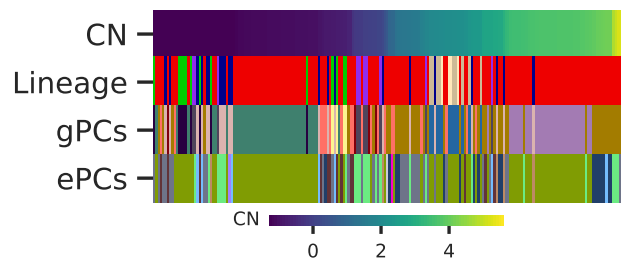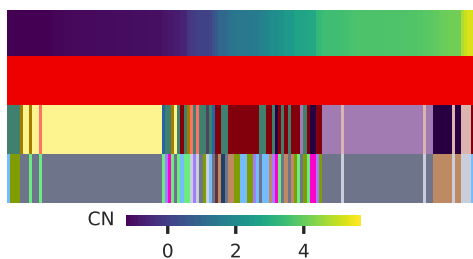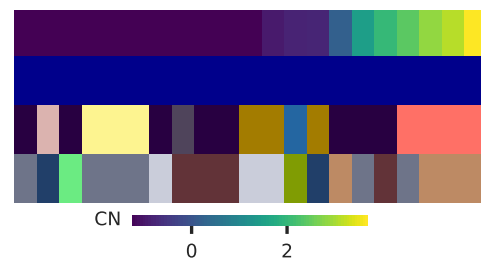

Tsu4

Supplement: supp [file elife-60474-supp-v1.zip]

■ *SpA*
■ *SpB*
■ *SpC*
■ *SpC\**
■ *SpD<sub>1</sub>*
■ *SpD<sub>2</sub>*

**a**

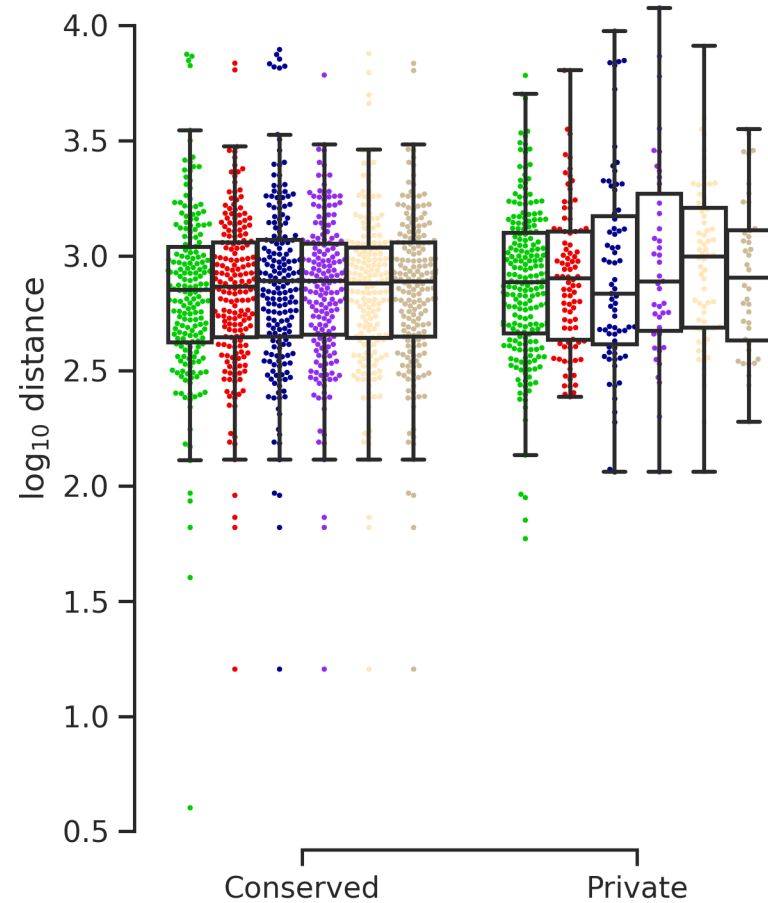

**b**

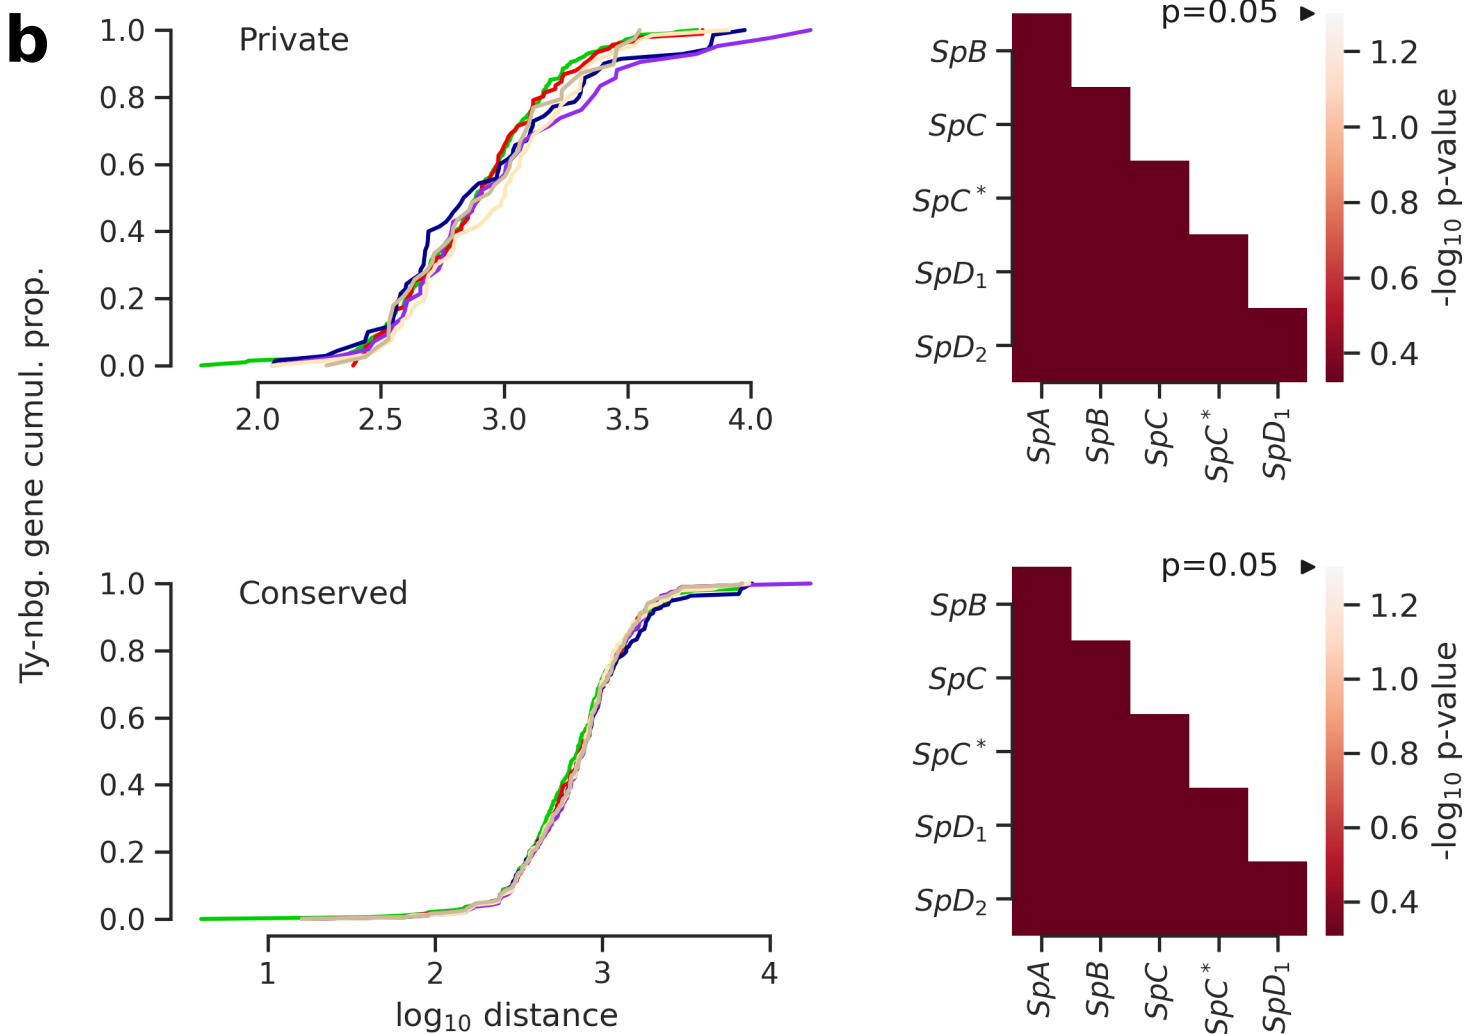

**c**

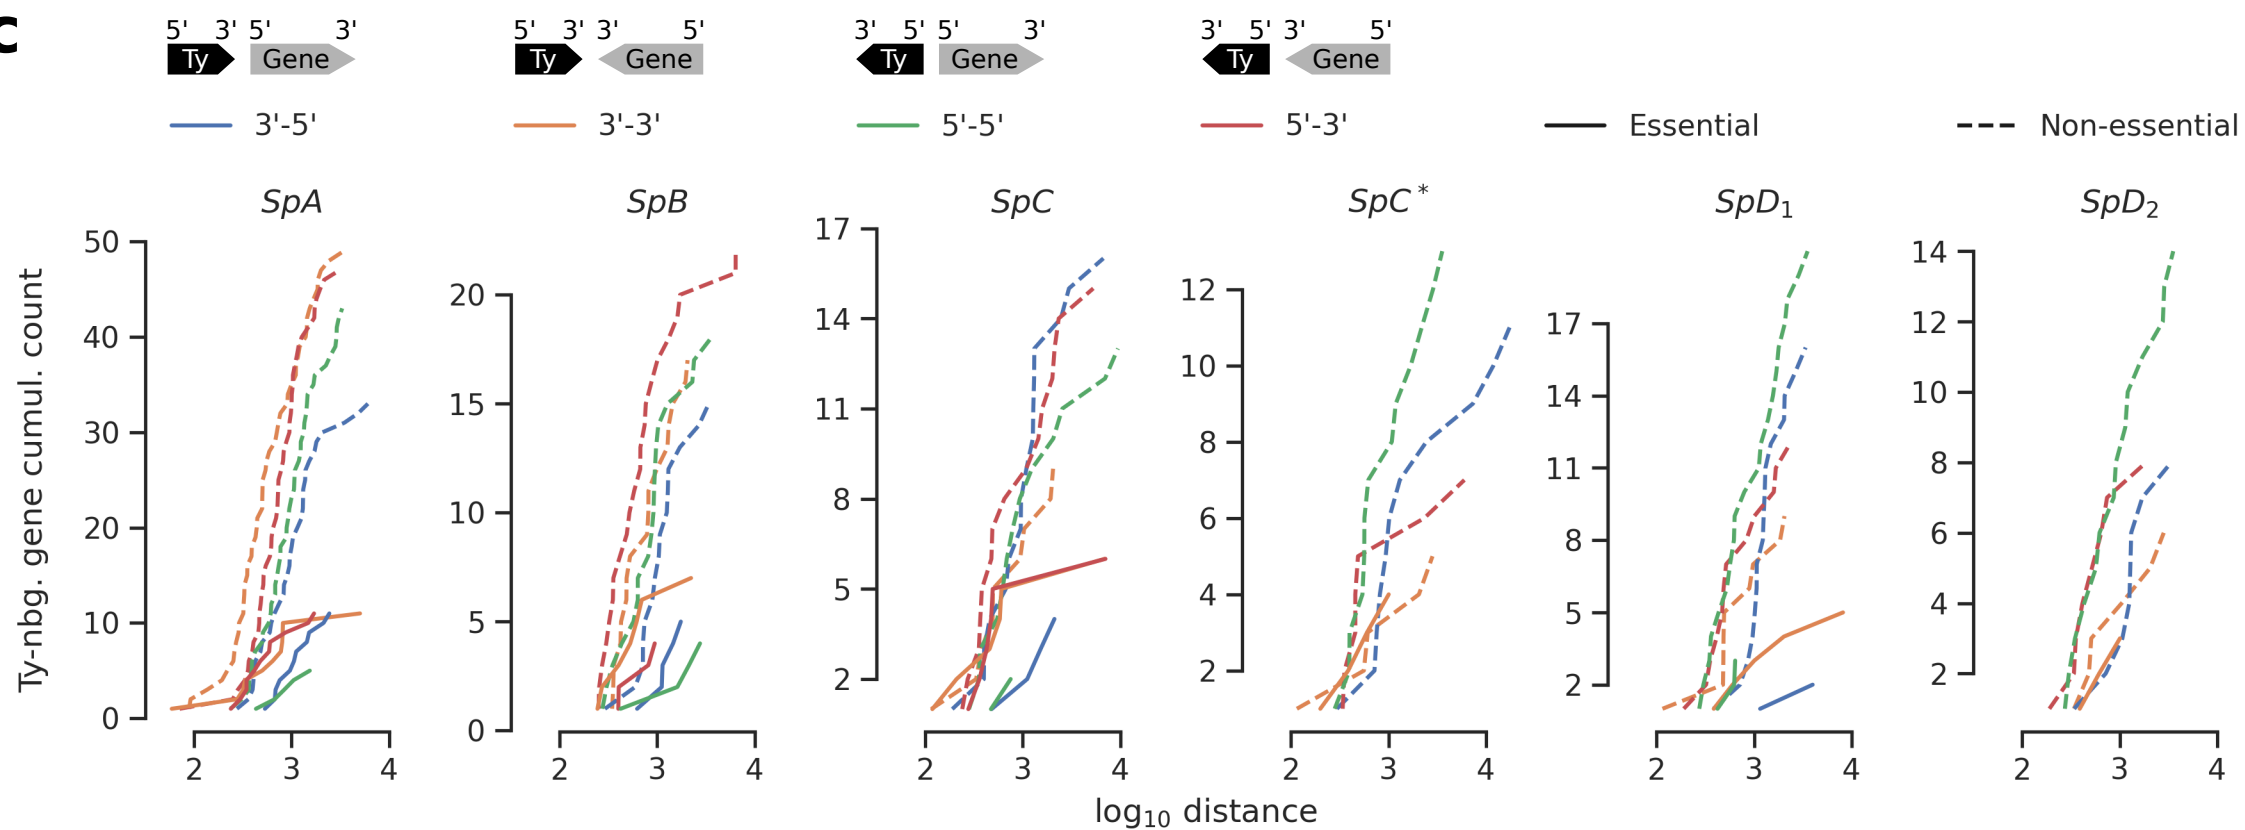

Supplement: supp [file elife-60474-supp-v1.zip]

● Ty1    ● Ty2    ● Ty3p    ● Ty3    ● Tsu4    ● Ty4    ● Ty5

*SpA*

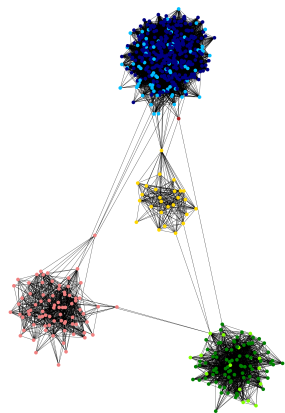

*SpB*

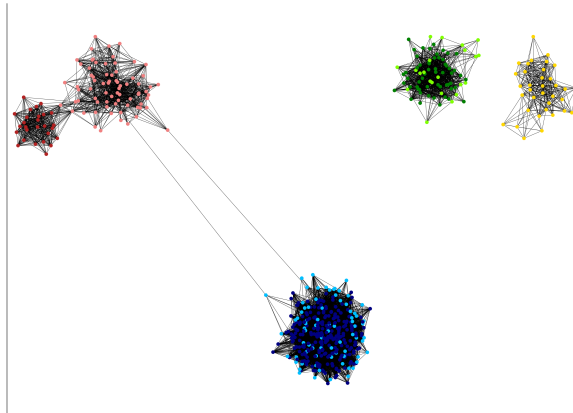

*SpC*

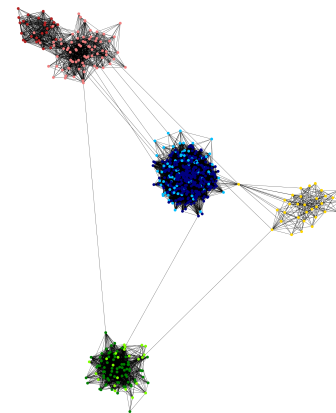

*SpC\**

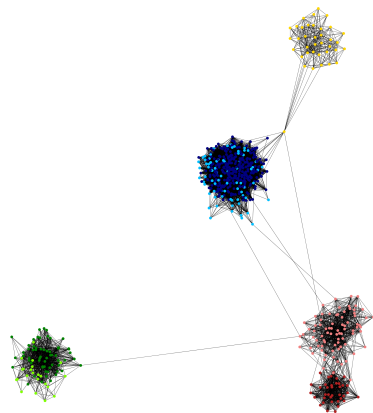

*SpD<sub>1</sub>*

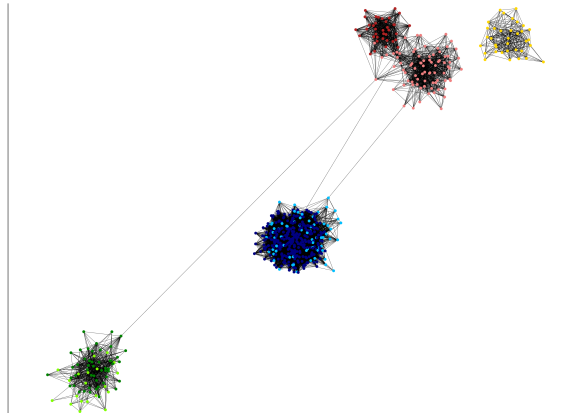

*SpD<sub>2</sub>*

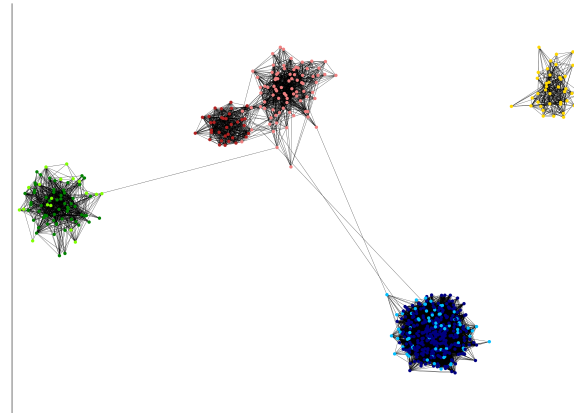

Supplement: supp [file elife-60474-supp-v1.zip]

**a**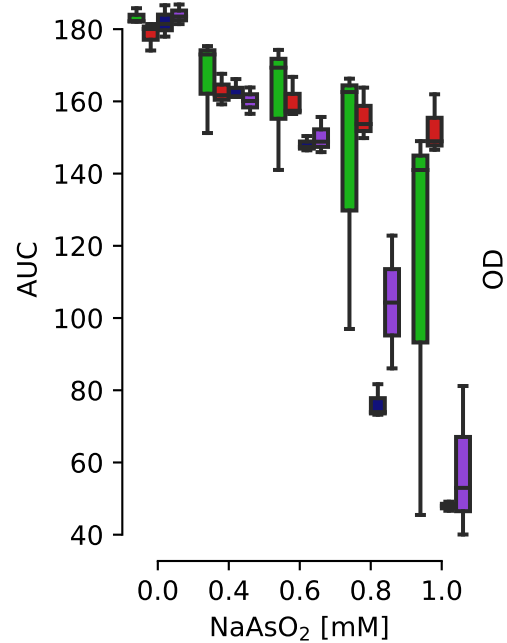**b**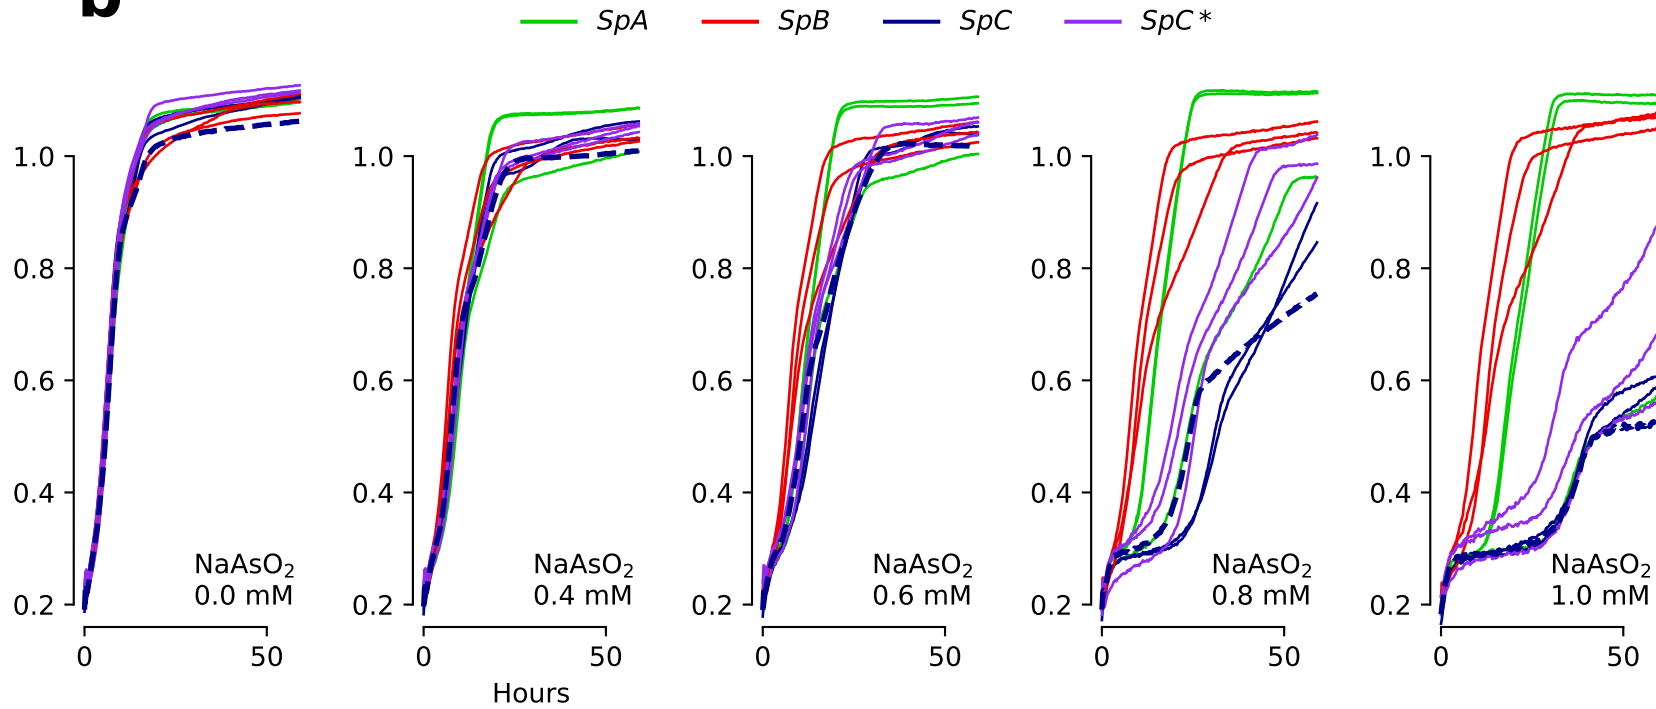

Supplement: supp [file elife-60474-supp-v1.zip]

All lineages

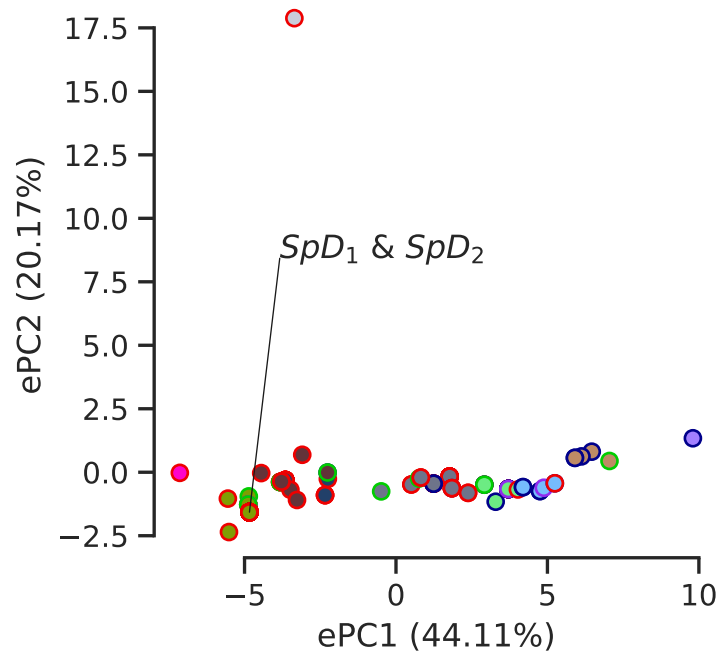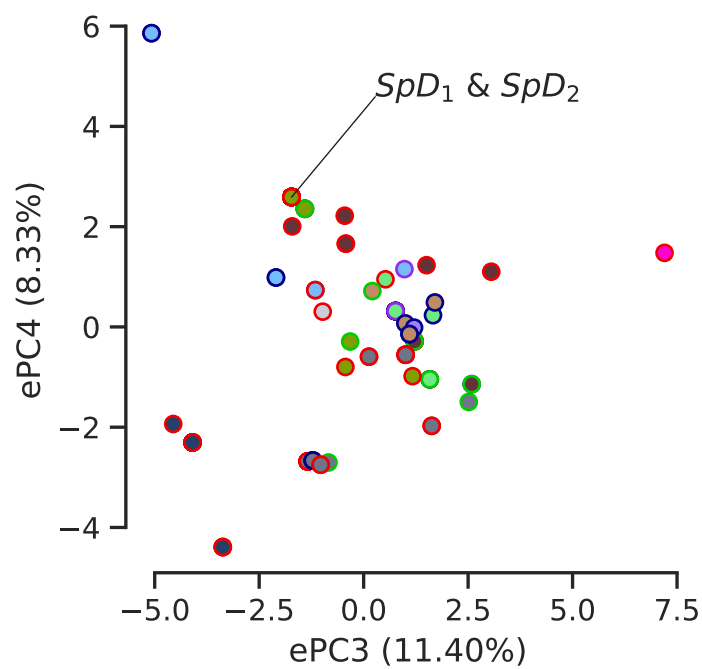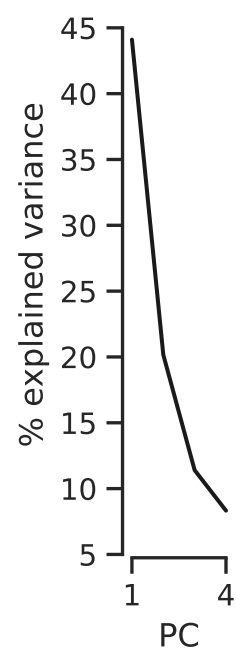

*SpB*

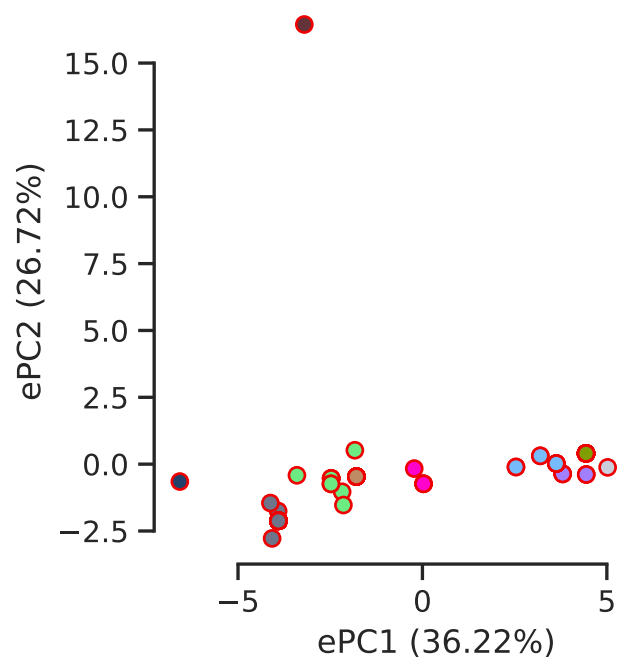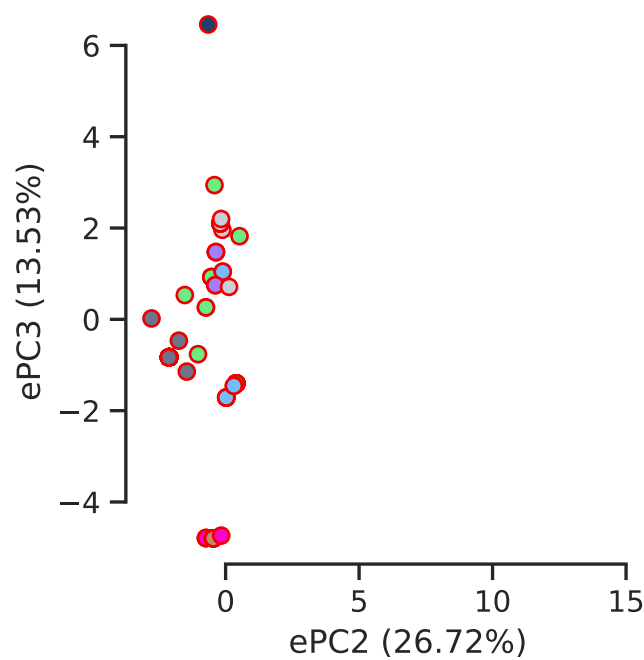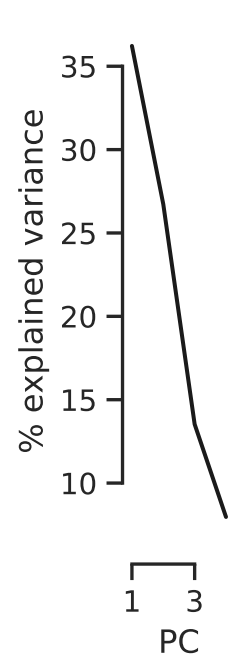

*SpC*

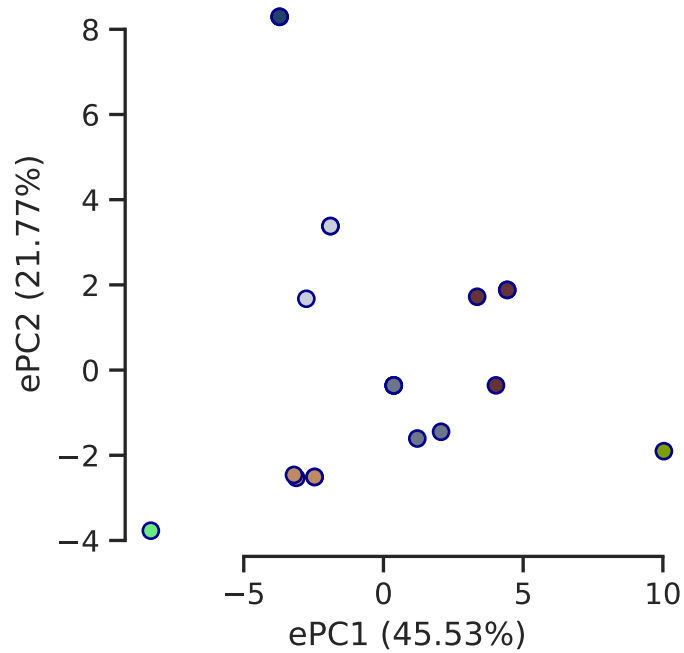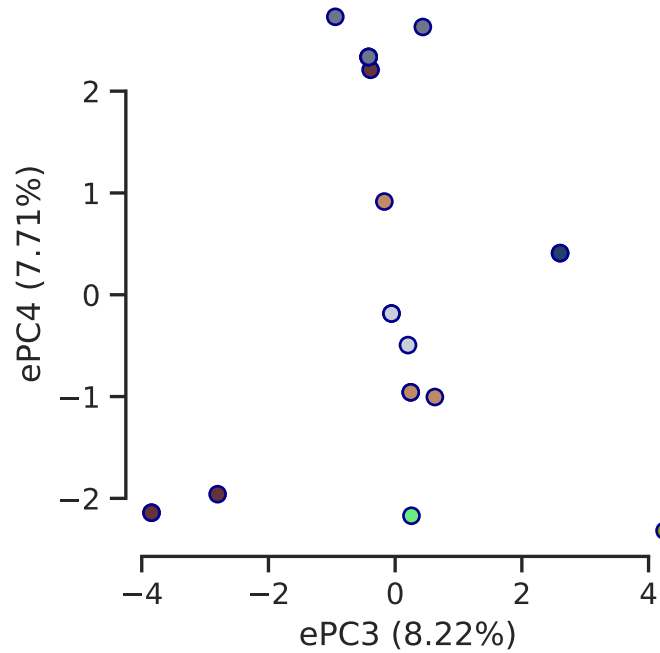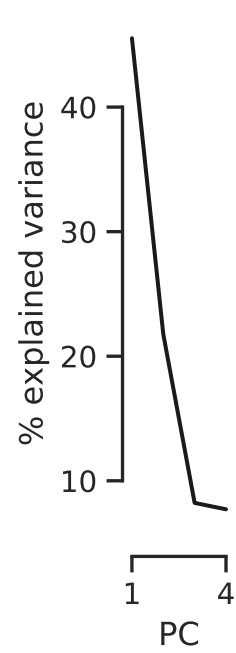

Supplement: supp [file elife-60474-supp-v1.zip]

All lineages

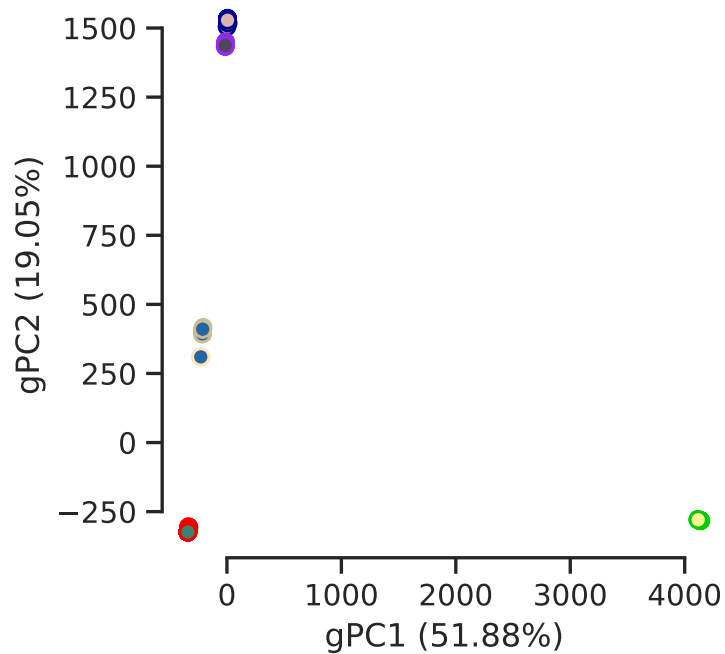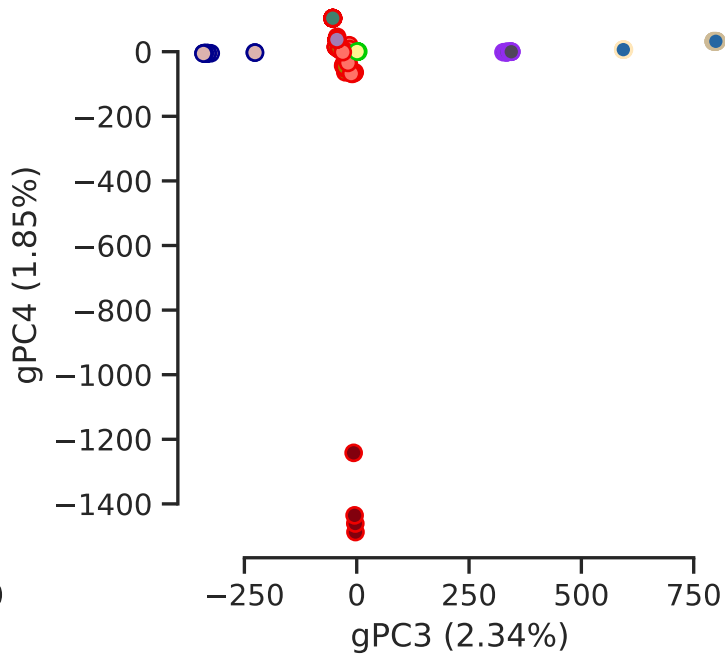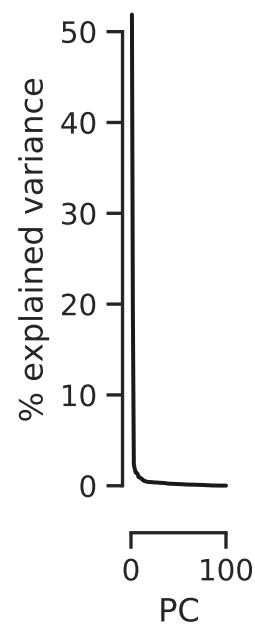

*SpB*

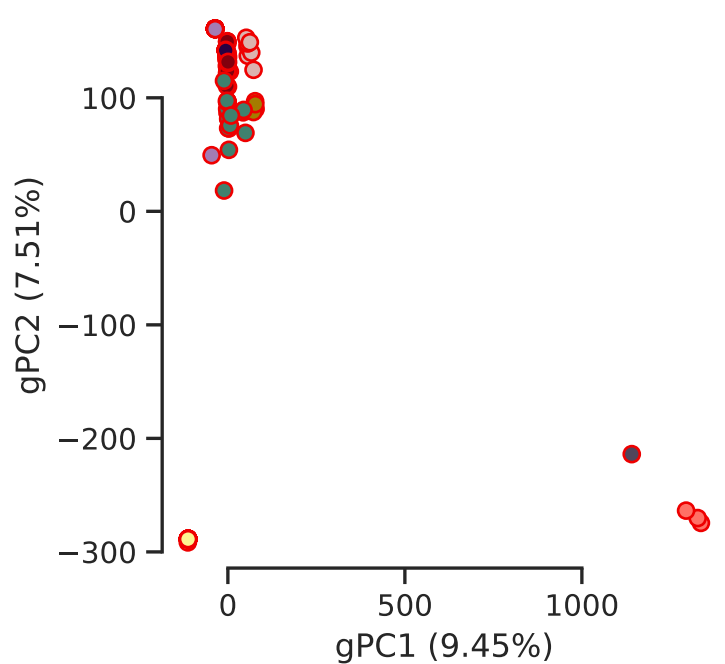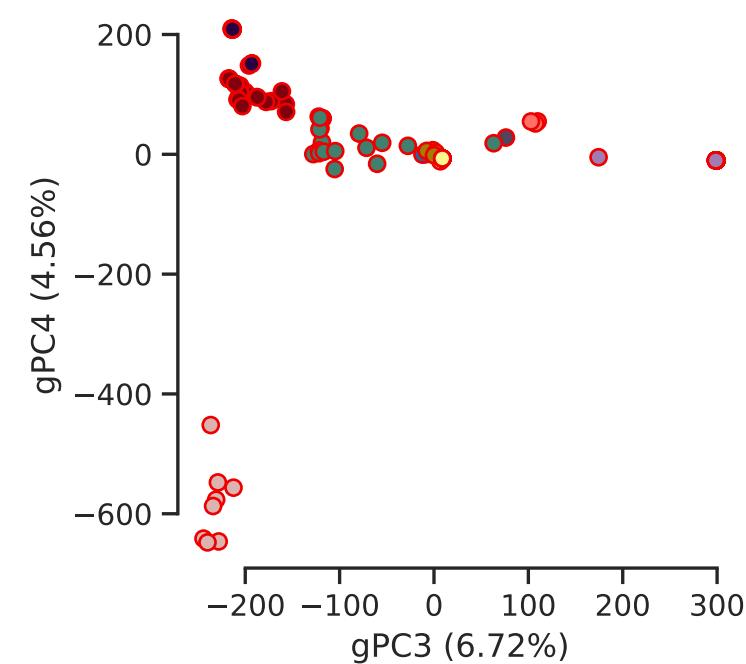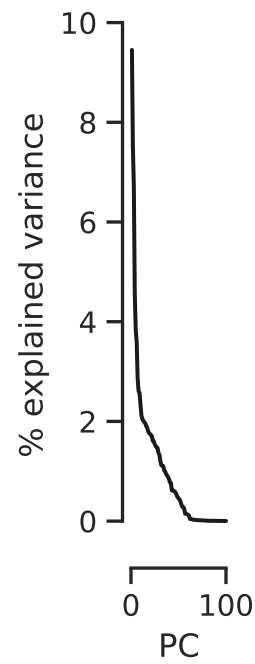

*SpC*

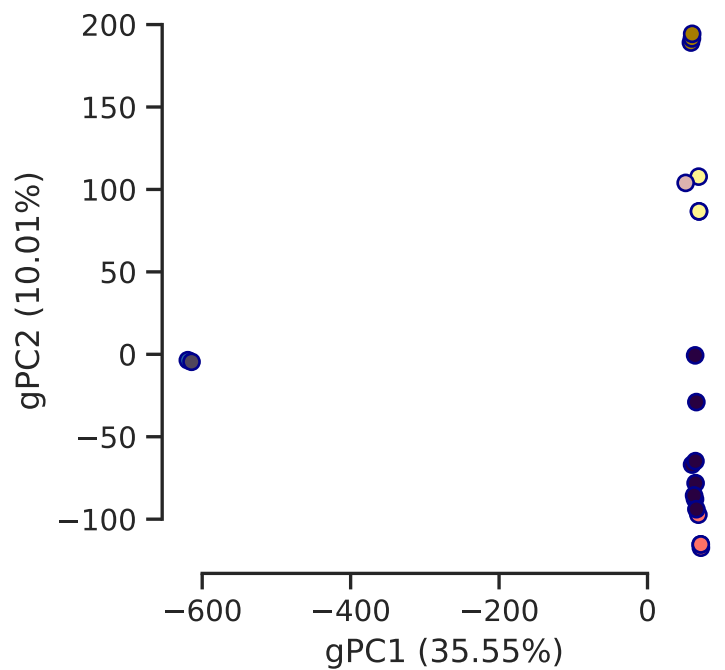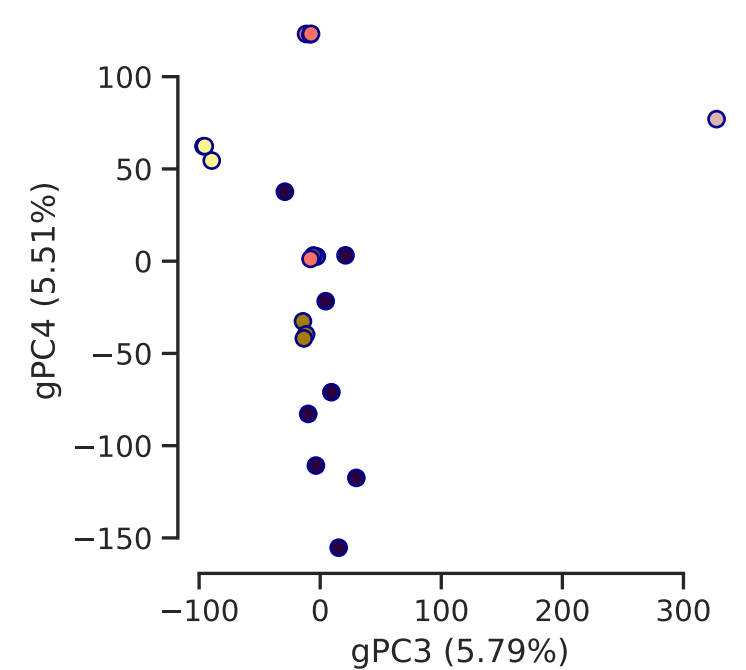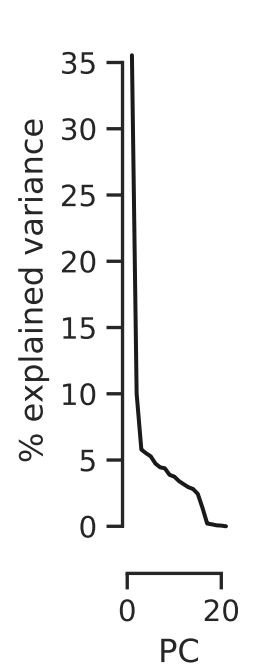

Supplement: supp [file elife-60474-supp-v1.zip]
